# Supplementary material for: Visualizing the GPCR Network: Classification and Evolution
Source: PubMed Central journal article supplement (PMC5686146; doi:10.1038/s41598-017-15707-9), 2017-11-14
Supplement: 41598_2017_15707_MOESM1_ESM.pdf [file 41598_2017_15707_MOESM1_ESM.pdf]

# Supporting Information

## For “Visualizing the GPCR Network: Classification and Evolution”

by Geng-Ming Hu, Te-Lun Mai, and Chi-Ming Chen

### Table of Contents

1. Supplementary Figures S1-S4 discussed in the paper (pages 1-4).
2. Supplementary Tables of the target dataset (S1) and the test dataset (S2) (pages 5-68).

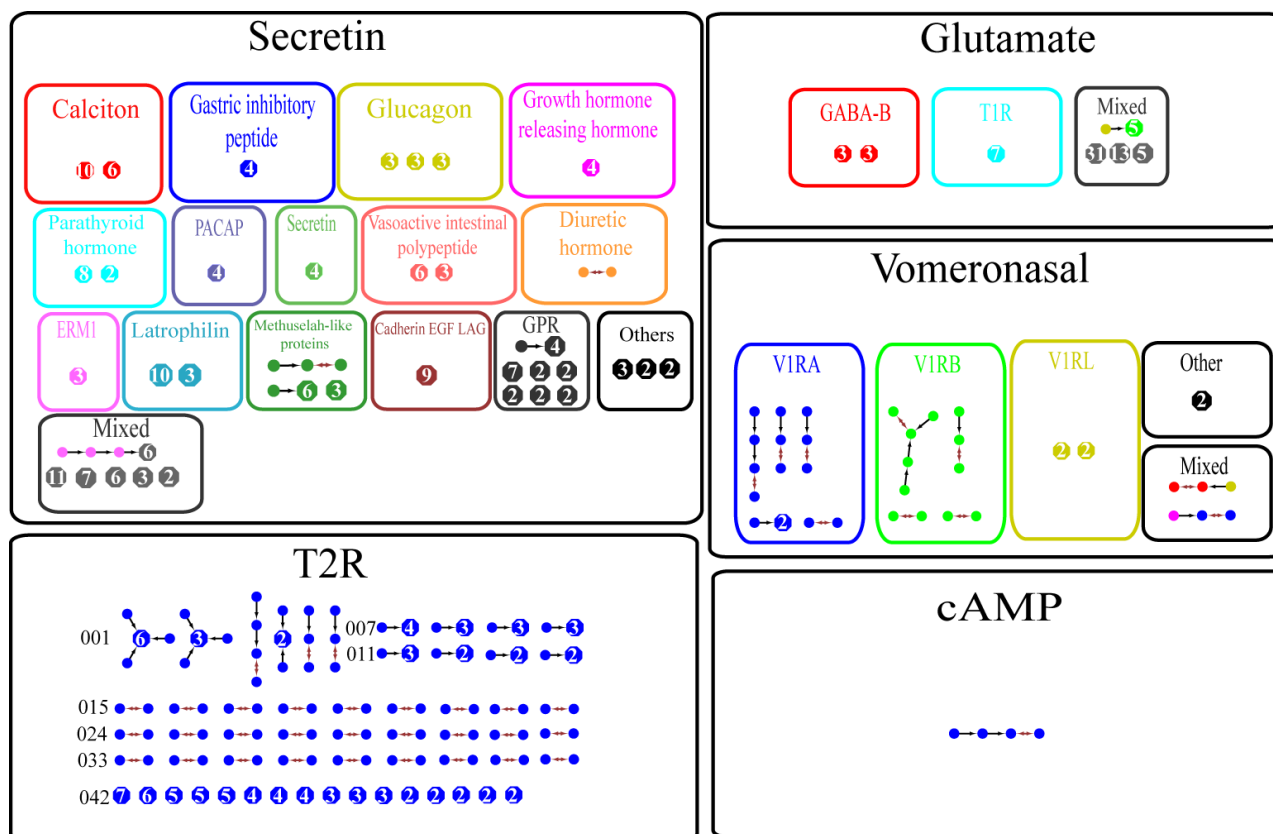

Figure S1. The minimum spanning tree diagrams of 117 level 1 MSC clusters in the target dataset (except for the rhodopsin-like class). Here each circle represents a GPCR sequence, and each hexagon represents a number of sequences whose mutual  $E$  value is zero (the number is shown in the hexagon). The color of circles or hexagons is chosen based on their functional classification in the GPCRdb.

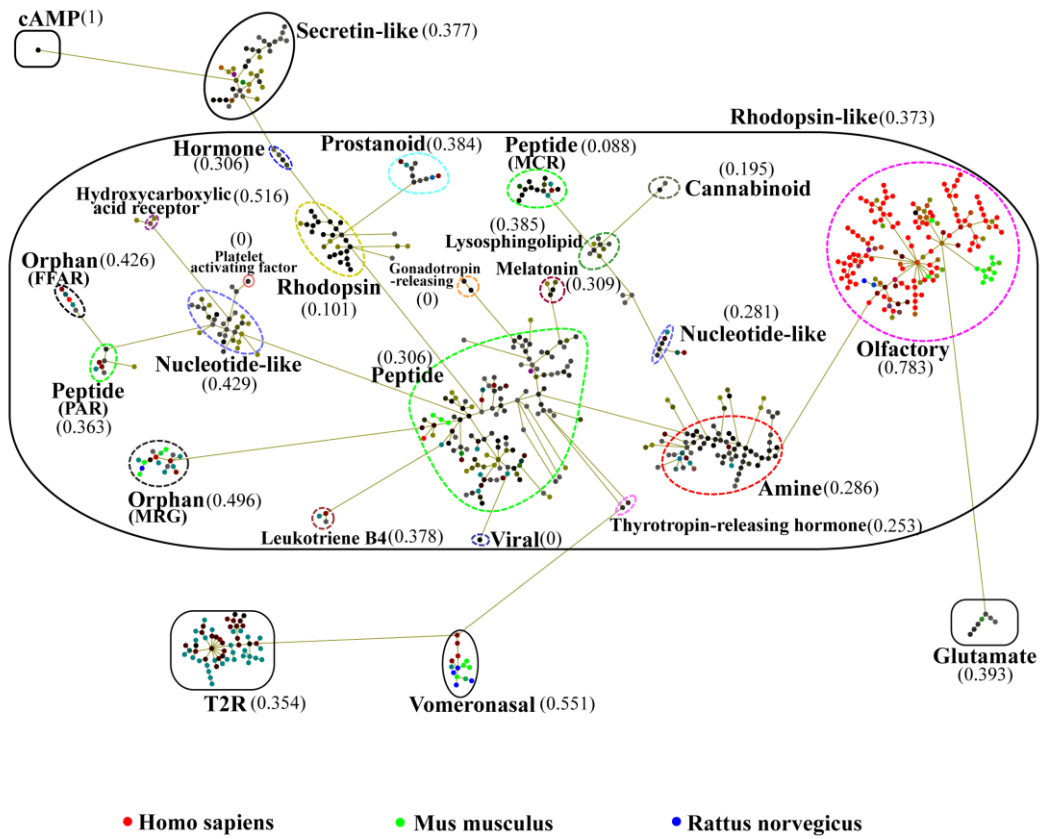

Figure S2. The minimum spanning tree diagram of the 620 level 1 MSC clusters for the GPCR network in the target dataset. Here each circle represents an MSC cluster the color of which is according to the types of organisms from which its member sequences are derived. Explicitly, to specify the species origin of sequences in each MSC cluster, we calculate the percentage of Homo sapiens ( $h$ ), Mus musculus ( $m$ ), Rattus norvegicus ( $r$ ), and others ( $1-h-m-r$ ). The (R, G, B) color of each node is calculated as  $(255 \times h, 255 \times m, 255 \times r)$ . Numbers in the parentheses are the average percentage of paralog pairs for various functional clusters (averaged over all nodes in each functional cluster).

(a) Homo sapiens

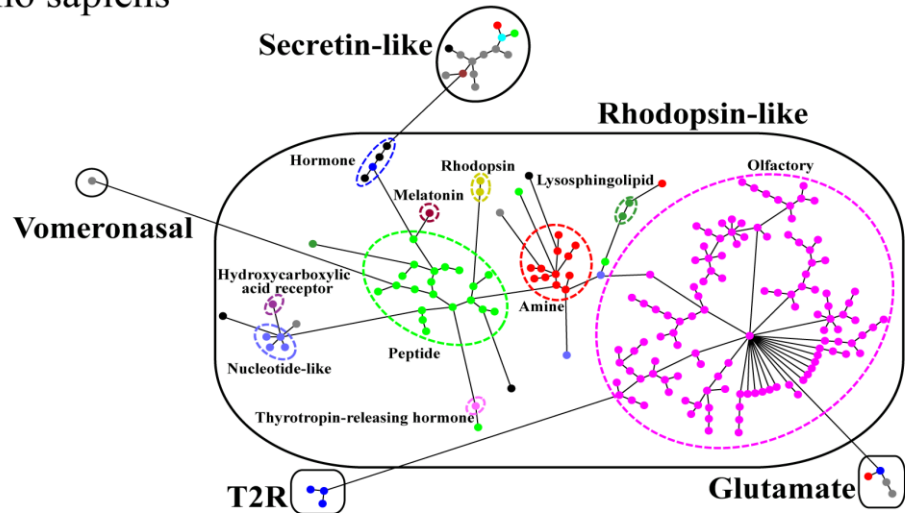

(b) Mus musculus

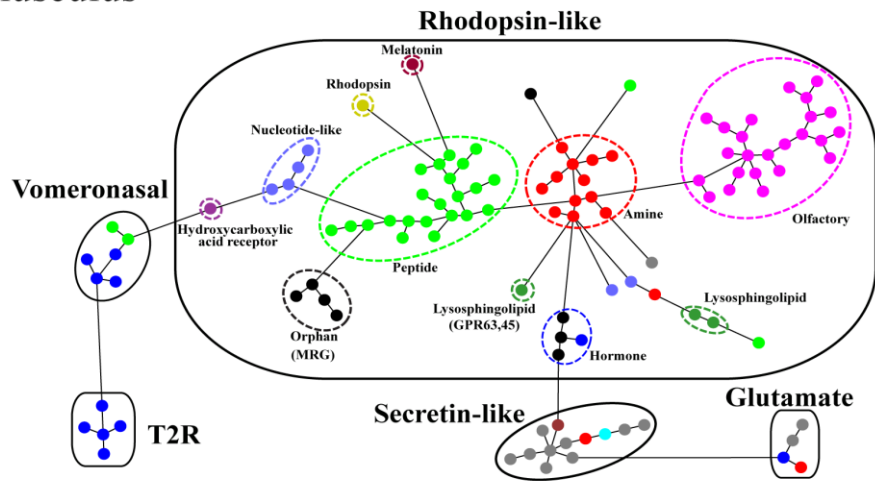

(c) Rattus norvegicus

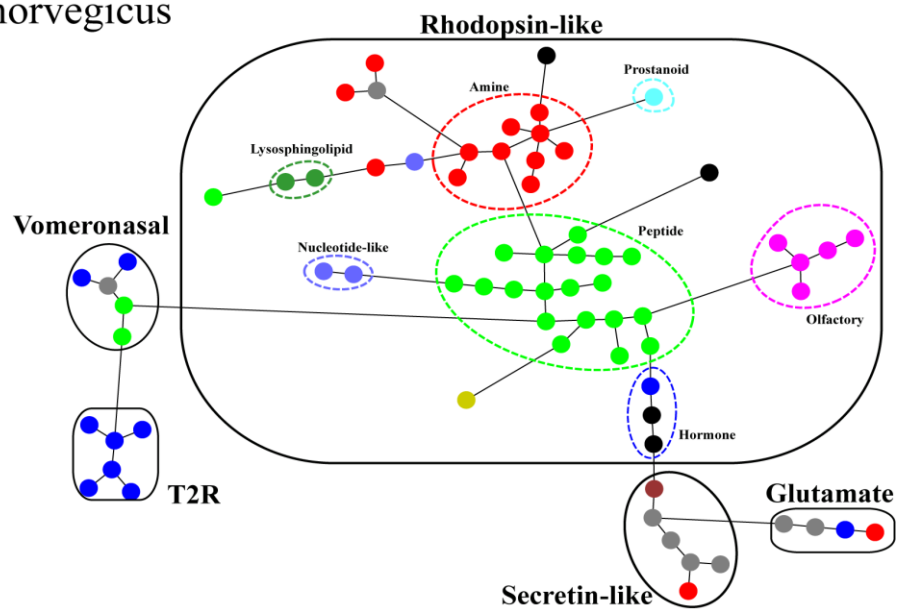

Figure S3. The minimum spanning tree diagrams of the GPCR network of Homo sapiens (a), Mus musculus (b), and Rattus norvegicus (c). Here each circle represents an MSC cluster the color of which is according to the color scheme in Fig. 5.

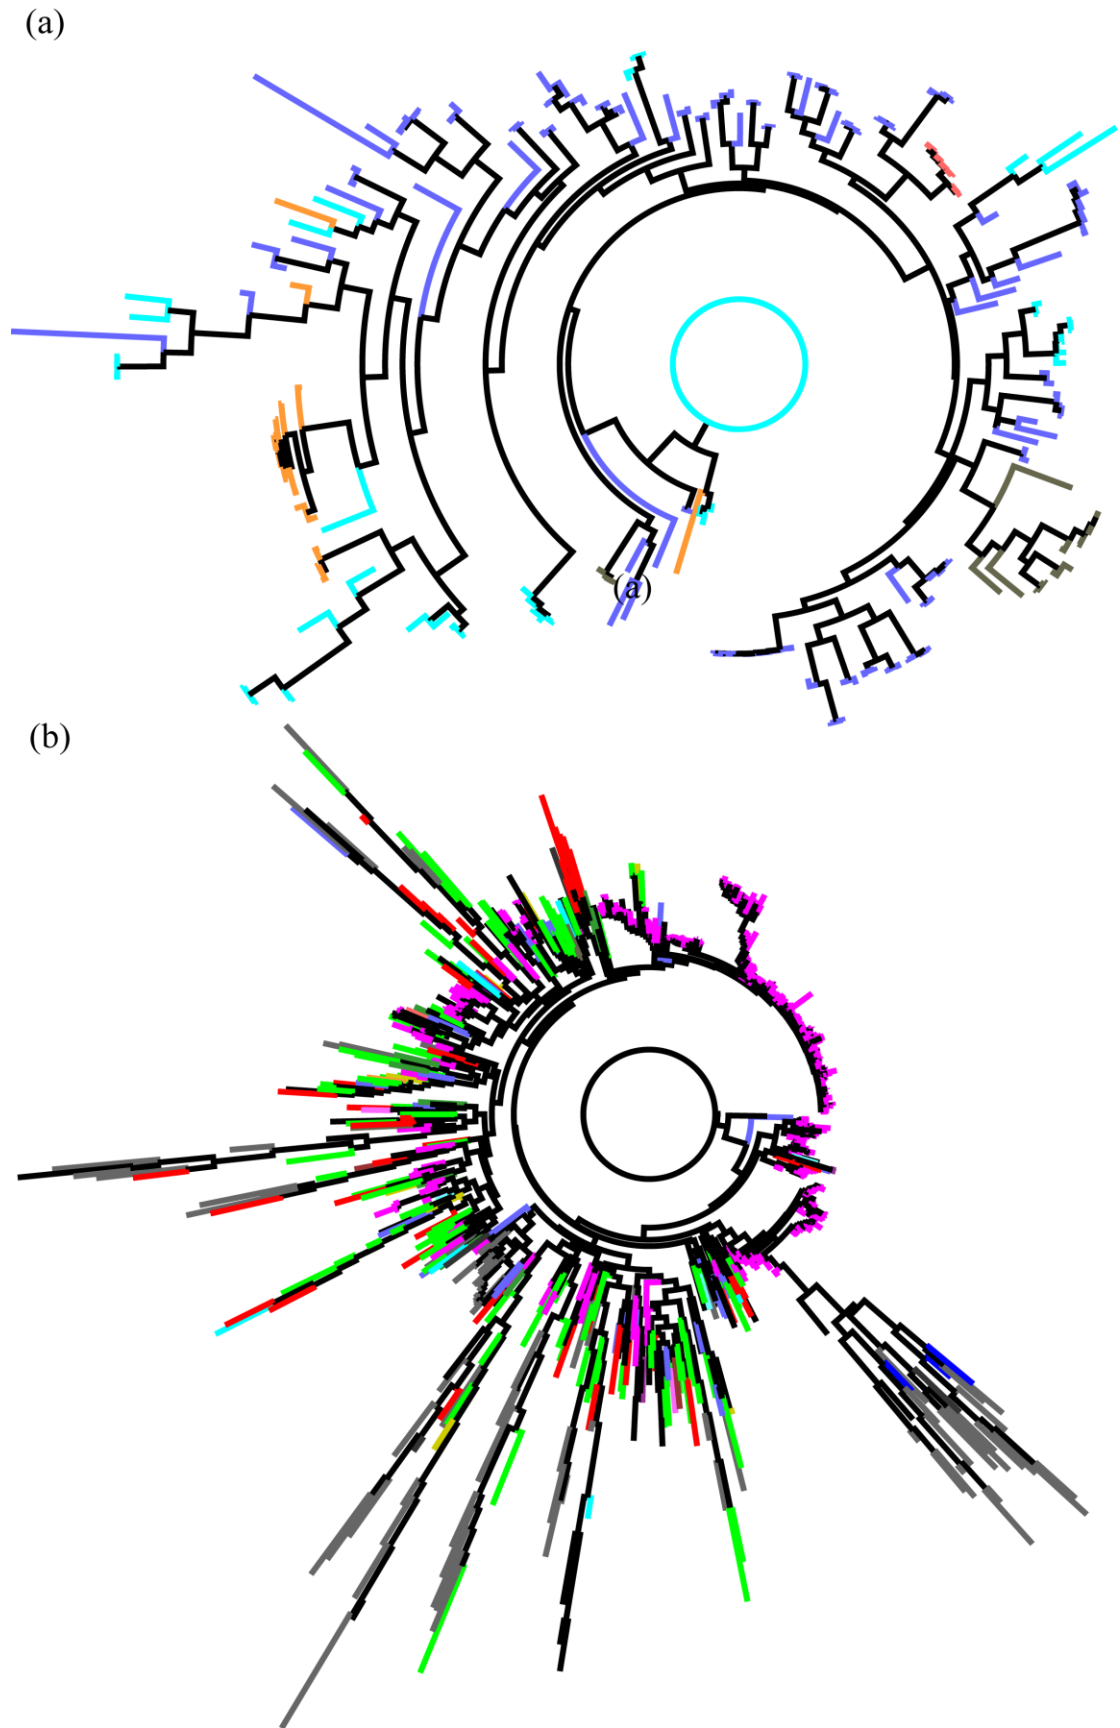

Figure S4. Phylogenetic tree of 185 GPCR sequences in the target dataset (a) and that of 804 GPCR sequences in the Homo sapiens dataset (b) constructed by the NJ method. The color scheme is the same as that in Fig. 5.

Table S1. MSC clustering of 2770 GPCR sequences in the target dataset.

| <b>MSC cluster label</b> | <b>Uniprot ID</b> | <b>GPCRDB label (level 2)</b> | <b>GPCRDB function label</b> |
|--------------------------|-------------------|-------------------------------|------------------------------|
| Am-001                   | Q90WY4            | Amine                         | Alpha Adrenoceptors type 2a  |
| Am-001                   | Q60474            | Amine                         | Alpha Adrenoceptors type 2a  |
| Am-001                   | P18871            | Amine                         | Alpha Adrenoceptors type 2a  |
| Am-001                   | Q01338            | Amine                         | Alpha Adrenoceptors type 2a  |
| Am-001                   | P22909            | Amine                         | Alpha Adrenoceptors type 2a  |
| Am-001                   | Q28838            | Amine                         | Alpha Adrenoceptors type 2a  |
| Am-001                   | P08913            | Amine                         | Alpha Adrenoceptors type 2a  |
| Am-001                   | Q90WY5            | Amine                         | Alpha Adrenoceptors type 2b  |
| Am-002                   | P79748            | Amine                         | Serotonin type 1d            |
| Am-002                   | P49145            | Amine                         | Serotonin type 1d            |
| Am-002                   | P28565            | Amine                         | Serotonin type 1d            |
| Am-002                   | P28221            | Amine                         | Serotonin type 1d            |
| Am-002                   | P79400            | Amine                         | Serotonin type 1d            |
| Am-002                   | Q61224            | Amine                         | Serotonin type 1d            |
| Am-002                   | P11614            | Amine                         | Serotonin type 1d            |
| Am-002                   | Q60484            | Amine                         | Serotonin type 1d            |
| Am-003                   | P21917            | Amine                         | Dopamine Vertebrate type 4   |
| Am-003                   | P30729            | Amine                         | Dopamine Vertebrate type 4   |
| Am-003                   | Q6TLJ0            | Amine                         | Dopamine Vertebrate type 4   |
| Am-003                   | P51436            | Amine                         | Dopamine Vertebrate type 4   |
| Am-004                   | P22270            | Amine                         | Octopamine type 4            |
| Am-004                   | Q17232            | Amine                         | Octopamine type 6            |
| Am-004                   | Q25188            | Amine                         | Octopamine type 6            |
| Am-004                   | O02213            | Amine                         | Octopamine type 6            |
| Am-005                   | Q4LBB6            | Amine                         | Dopamine Non Vertebrate      |
| Am-005                   | Q9VCZ3            | Amine                         | Octopamine type 1            |
| Am-005                   | Q4LBB9            | Amine                         | Octopamine type 2            |
| Am-006                   | Q25414            | Amine                         | Serotonin Insect             |
| Am-006                   | Q25190            | Amine                         | Serotonin Insect             |
| Am-006                   | Q17239            | Amine                         | Serotonin Insect             |
| Am-007                   | P30545            | Amine                         | Alpha Adrenoceptors type 2b  |
| Am-007                   | Q60475            | Amine                         | Alpha Adrenoceptors type 2b  |
| Am-007                   | P18089            | Amine                         | Alpha Adrenoceptors type 2b  |
| Am-007                   | O19012            | Amine                         | Alpha Adrenoceptors type 2b  |
| Am-007                   | O77830            | Amine                         | Alpha Adrenoceptors type 2b  |
| Am-007                   | O77715            | Amine                         | Alpha Adrenoceptors type 2b  |
| Am-007                   | O18935            | Amine                         | Alpha Adrenoceptors type 2b  |
| Am-007                   | P19328            | Amine                         | Alpha Adrenoceptors type 2b  |
| Am-007                   | O77721            | Amine                         | Alpha Adrenoceptors type 2b  |
| Am-007                   | O19014            | Amine                         | Alpha Adrenoceptors type 2b  |
| Am-007                   | O19054            | Amine                         | Alpha Adrenoceptors type 2b  |

|        |        |       |                                       |
|--------|--------|-------|---------------------------------------|
| Am-007 | O19091 | Amine | Alpha Adrenoceptors type 2b           |
| Am-007 | O77700 | Amine | Alpha Adrenoceptors type 2b           |
| Am-007 | O77713 | Amine | Alpha Adrenoceptors type 2b           |
| Am-008 | Q6XXY0 | Amine | Serotonin type 1a                     |
| Am-008 | Q9N298 | Amine | Serotonin type 1a                     |
| Am-008 | Q98998 | Amine | Serotonin type 1a                     |
| Am-008 | P19327 | Amine | Serotonin type 1a                     |
| Am-008 | Q9N297 | Amine | Serotonin type 1a                     |
| Am-008 | Q64264 | Amine | Serotonin type 1a                     |
| Am-008 | O42384 | Amine | Serotonin type 1a                     |
| Am-008 | O42385 | Amine | Serotonin type 1a                     |
| Am-008 | Q9N296 | Amine | Serotonin type 1a                     |
| Am-008 | Q0EAB6 | Amine | Serotonin type 1a                     |
| Am-008 | Q6XXX9 | Amine | Serotonin type 1a                     |
| Am-008 | P08908 | Amine | Serotonin type 1a                     |
| Am-009 | Q4KWL2 | Amine | Beta Adrenoceptors type 2             |
| Am-009 | P54833 | Amine | Beta Adrenoceptors type 2             |
| Am-009 | Q28509 | Amine | Beta Adrenoceptors type 2             |
| Am-009 | P07550 | Amine | Beta Adrenoceptors type 2             |
| Am-009 | Q8K4Z4 | Amine | Beta Adrenoceptors type 2             |
| Am-009 | Q28997 | Amine | Beta Adrenoceptors type 2             |
| Am-009 | P10608 | Amine | Beta Adrenoceptors type 2             |
| Am-009 | Q8UUY8 | Amine | Beta Adrenoceptors type 2             |
| Am-009 | Q9TST5 | Amine | Beta Adrenoceptors type 2             |
| Am-009 | P18762 | Amine | Beta Adrenoceptors type 2             |
| Am-009 | Q28044 | Amine | Beta Adrenoceptors type 2             |
| Am-009 | P04274 | Amine | Beta Adrenoceptors type 2             |
| Am-010 | Q9TST4 | Amine | Beta Adrenoceptors type 3             |
| Am-010 | Q28524 | Amine | Beta Adrenoceptors type 3             |
| Am-010 | P46626 | Amine | Beta Adrenoceptors type 3             |
| Am-010 | Q60483 | Amine | Beta Adrenoceptors type 3             |
| Am-010 | P13945 | Amine | Beta Adrenoceptors type 3             |
| Am-010 | Q95252 | Amine | Beta Adrenoceptors type 3             |
| Am-010 | O02662 | Amine | Beta Adrenoceptors type 3             |
| Am-010 | Q9XT58 | Amine | Beta Adrenoceptors type 3             |
| Am-010 | Q9XT57 | Amine | Beta Adrenoceptors type 3             |
| Am-010 | P25962 | Amine | Beta Adrenoceptors type 3             |
| Am-010 | P26255 | Amine | Beta Adrenoceptors type 3             |
| Am-011 | Q9U7D5 | Amine | Musc. acetylcholine Non Vertebrate    |
| Am-011 | Q9N2A3 | Amine | Musc. acetylcholine Vertebrate type 3 |
| Am-011 | P20309 | Amine | Musc. acetylcholine Vertebrate type 3 |
| Am-011 | P49578 | Amine | Musc. acetylcholine Vertebrate type 3 |
| Am-011 | P08483 | Amine | Musc. acetylcholine Vertebrate type 3 |
| Am-011 | P11483 | Amine | Musc. acetylcholine Vertebrate type 3 |
| Am-011 | Q9N2A2 | Amine | Musc. acetylcholine Vertebrate type 3 |

|        |        |       |                                       |
|--------|--------|-------|---------------------------------------|
| Am-011 | P41984 | Amine | Musc. acetylcholine Vertebrate type 3 |
| Am-011 | Q9ERZ3 | Amine | Musc. acetylcholine Vertebrate type 3 |
| Am-012 | Q28998 | Amine | Beta Adrenoceptors type 1             |
| Am-012 | Q9TST6 | Amine | Beta Adrenoceptors type 1             |
| Am-012 | P08588 | Amine | Beta Adrenoceptors type 1             |
| Am-012 | P79148 | Amine | Beta Adrenoceptors type 1             |
| Am-012 | P47899 | Amine | Beta Adrenoceptors type 1             |
| Am-012 | P18090 | Amine | Beta Adrenoceptors type 1             |
| Am-012 | P34971 | Amine | Beta Adrenoceptors type 1             |
| Am-012 | Q9TT96 | Amine | Beta Adrenoceptors type 1             |
| Am-012 | P43141 | Amine | Beta Adrenoceptors type 4             |
| Am-013 | P43140 | Amine | Alpha Adrenoceptors type 1a           |
| Am-013 | Q9WU25 | Amine | Alpha Adrenoceptors type 1a           |
| Am-013 | Q91175 | Amine | Alpha Adrenoceptors type 1a           |
| Am-013 | P97718 | Amine | Alpha Adrenoceptors type 1a           |
| Am-013 | O02824 | Amine | Alpha Adrenoceptors type 1a           |
| Am-013 | P18130 | Amine | Alpha Adrenoceptors type 1a           |
| Am-013 | P35348 | Amine | Alpha Adrenoceptors type 1a           |
| Am-014 | P32305 | Amine | Serotonin type 7                      |
| Am-014 | P50407 | Amine | Serotonin type 7                      |
| Am-014 | P34969 | Amine | Serotonin type 7                      |
| Am-014 | P32304 | Amine | Serotonin type 7                      |
| Am-014 | Q91559 | Amine | Serotonin type 7                      |
| Am-015 | P35405 | Amine | Alpha Adrenoceptors type 2c           |
| Am-015 | Q01337 | Amine | Alpha Adrenoceptors type 2c           |
| Am-015 | P18825 | Amine | Alpha Adrenoceptors type 2c           |
| Am-015 | Q60476 | Amine | Alpha Adrenoceptors type 2c           |
| Am-015 | P22086 | Amine | Alpha Adrenoceptors type 2c           |
| Am-016 | Q9QXI3 | Amine | Trace amine type 9                    |
| Am-016 | Q8BZA7 | Amine | Trace amine type 9                    |
| Am-016 | Q96P69 | Amine | Trace amine type 9                    |
| Am-016 | Q8NDV2 | Amine | Trace amine type 9                    |
| Am-017 | Q02152 | Amine | Serotonin type 2b                     |
| Am-017 | Q8UUG8 | Amine | Serotonin type 2b                     |
| Am-017 | P30994 | Amine | Serotonin type 2b                     |
| Am-017 | P41595 | Amine | Serotonin type 2b                     |
| Am-018 | Q8TDV5 | Amine | Trace amine type 9                    |
| Am-018 | Q7TQP3 | Amine | Trace amine type 9                    |
| Am-018 | Q7TQN8 | Amine | Trace amine type 9                    |
| Am-019 | Q91ZY2 | Amine | Histamine type 4                      |
| Am-019 | Q91ZY1 | Amine | Histamine type 4                      |
| Am-019 | Q9H3N8 | Amine | Histamine type 4                      |
| Am-020 | Q91081 | Amine | Alpha Adrenoceptors type 2c           |
| Am-020 | Q90WY6 | Amine | Alpha Adrenoceptors type 2c           |
| Am-021 | P28285 | Amine | Serotonin Insect                      |

|        |        |       |                            |
|--------|--------|-------|----------------------------|
| Am-021 | P28286 | Amine | Serotonin Insect           |
| Am-022 | O42574 | Amine | Beta Adrenoceptors type 1  |
| Am-022 | P07700 | Amine | Beta Adrenoceptors type 1  |
| Am-023 | P35404 | Amine | Serotonin type 1b          |
| Am-023 | P28222 | Amine | Serotonin type 1b          |
| Am-023 | O08892 | Amine | Serotonin type 1b          |
| Am-023 | P60020 | Amine | Serotonin type 1b          |
| Am-023 | Q0EAB5 | Amine | Serotonin type 1b          |
| Am-023 | P46636 | Amine | Serotonin type 1b          |
| Am-023 | Q588Y6 | Amine | Serotonin type 1b          |
| Am-023 | P49144 | Amine | Serotonin type 1b          |
| Am-023 | P56496 | Amine | Serotonin type 1b          |
| Am-023 | P28334 | Amine | Serotonin type 1b          |
| Am-023 | P79250 | Amine | Serotonin type 1b          |
| Am-023 | P28564 | Amine | Serotonin type 1b          |
| Am-023 | Q6XXX8 | Amine | Serotonin type 1b          |
| Am-024 | Q923Y2 | Amine | Trace amine type 15        |
| Am-024 | Q5QD12 | Amine | Trace amine type 15        |
| Am-024 | Q5QD11 | Amine | Trace amine type 7         |
| Am-024 | Q5QD09 | Amine | Trace amine type 7         |
| Am-024 | Q923X5 | Amine | Trace amine type 7         |
| Am-024 | Q923X6 | Amine | Trace amine type 7         |
| Am-024 | Q923Y4 | Amine | Trace amine type 7         |
| Am-024 | Q923Y1 | Amine | Trace amine type 7         |
| Am-024 | Q5QD21 | Amine | Trace amine type 7         |
| Am-024 | Q5QD10 | Amine | Trace amine type 7         |
| Am-024 | Q5QD08 | Amine | Trace amine type 7         |
| Am-024 | Q923X8 | Amine | Trace amine type 7         |
| Am-025 | Q6TLI9 | Amine | Dopamine Vertebrate type 2 |
| Am-025 | Q9GJU1 | Amine | Dopamine Vertebrate type 2 |
| Am-025 | P61168 | Amine | Dopamine Vertebrate type 2 |
| Am-025 | P34973 | Amine | Dopamine Vertebrate type 2 |
| Am-025 | O73810 | Amine | Dopamine Vertebrate type 2 |
| Am-025 | P60026 | Amine | Dopamine Vertebrate type 2 |
| Am-025 | P52702 | Amine | Dopamine Vertebrate type 2 |
| Am-025 | P24628 | Amine | Dopamine Vertebrate type 2 |
| Am-025 | P61169 | Amine | Dopamine Vertebrate type 2 |
| Am-025 | P20288 | Amine | Dopamine Vertebrate type 2 |
| Am-025 | P53453 | Amine | Dopamine Vertebrate type 2 |
| Am-025 | P14416 | Amine | Dopamine Vertebrate type 2 |
| Am-026 | Q969N4 | Amine | Trace amine type 17        |
| Am-026 | Q923Y5 | Amine | Trace amine type 6         |
| Am-026 | Q5QD13 | Amine | Trace amine type 6         |
| Am-026 | Q5W8W0 | Amine | Trace amine type 6         |
| Am-026 | Q96RI8 | Amine | Trace amine type 6         |



|        |        |       |                                       |
|--------|--------|-------|---------------------------------------|
| Am-026 | Q923X9 | Amine | Trace amine type 8                    |
| Am-026 | Q923Y3 | Amine | Trace amine type 8                    |
| Am-026 | Q5QD06 | Amine | Trace amine type 8                    |
| Am-026 | Q923Y0 | Amine | Trace amine type 8                    |
| Am-026 | Q5QD05 | Amine | Trace amine type 8                    |
| Am-026 | Q5QD07 | Amine | Trace amine type 8                    |
| Am-027 | Q9ERZ4 | Amine | Musc. acetylcholine Vertebrate type 2 |
| Am-027 | P10980 | Amine | Musc. acetylcholine Vertebrate type 2 |
| Am-027 | P08172 | Amine | Musc. acetylcholine Vertebrate type 2 |
| Am-027 | Q9N2A7 | Amine | Musc. acetylcholine Vertebrate type 2 |
| Am-027 | P41985 | Amine | Musc. acetylcholine Vertebrate type 2 |
| Am-027 | P06199 | Amine | Musc. acetylcholine Vertebrate type 2 |
| Am-027 | P30372 | Amine | Musc. acetylcholine Vertebrate type 2 |
| Am-027 | P08173 | Amine | Musc. acetylcholine Vertebrate type 4 |
| Am-027 | P32211 | Amine | Musc. acetylcholine Vertebrate type 4 |
| Am-027 | P17200 | Amine | Musc. acetylcholine Vertebrate type 4 |
| Am-028 | P42289 | Amine | Dopamine Vertebrate type 1            |
| Am-028 | Q95136 | Amine | Dopamine Vertebrate type 1            |
| Am-028 | P21728 | Amine | Dopamine Vertebrate type 1            |
| Am-028 | Q61616 | Amine | Dopamine Vertebrate type 1            |
| Am-028 | P50130 | Amine | Dopamine Vertebrate type 1            |
| Am-028 | P35406 | Amine | Dopamine Vertebrate type 1            |
| Am-028 | P42288 | Amine | Dopamine Vertebrate type 1            |
| Am-028 | O77680 | Amine | Dopamine Vertebrate type 1            |
| Am-028 | P53452 | Amine | Dopamine Vertebrate type 1            |
| Am-028 | P18901 | Amine | Dopamine Vertebrate type 1            |
| Am-029 | P14842 | Amine | Serotonin type 2a                     |
| Am-029 | Q75Z89 | Amine | Serotonin type 2a                     |
| Am-029 | P18599 | Amine | Serotonin type 2a                     |
| Am-029 | Q5R4Q6 | Amine | Serotonin type 2a                     |
| Am-029 | P28223 | Amine | Serotonin type 2a                     |
| Am-029 | P35363 | Amine | Serotonin type 2a                     |
| Am-029 | P50129 | Amine | Serotonin type 2a                     |
| Am-029 | P50128 | Amine | Serotonin type 2a                     |
| Am-029 | O46635 | Amine | Serotonin type 2a                     |
| Am-030 | Q76MS7 | Amine | Histamine type 2                      |
| Am-030 | P25021 | Amine | Histamine type 2                      |
| Am-030 | P61752 | Amine | Histamine type 2                      |
| Am-030 | P17124 | Amine | Histamine type 2                      |
| Am-030 | P60021 | Amine | Histamine type 2                      |
| Am-030 | P25102 | Amine | Histamine type 2                      |
| Am-030 | P97292 | Amine | Histamine type 2                      |
| Am-030 | P47747 | Amine | Histamine type 2                      |
| Am-031 | P31389 | Amine | Histamine type 1                      |
| Am-031 | Q9N2B0 | Amine | Histamine type 1                      |

|        |        |       |                                       |
|--------|--------|-------|---------------------------------------|
| Am-031 | P31390 | Amine | Histamine type 1                      |
| Am-031 | P70174 | Amine | Histamine type 1                      |
| Am-031 | Q9N2B1 | Amine | Histamine type 1                      |
| Am-031 | P30546 | Amine | Histamine type 1                      |
| Am-031 | P35367 | Amine | Histamine type 1                      |
| Am-032 | Q5IS53 | Amine | Musc. acetylcholine Vertebrate type 5 |
| Am-032 | Q5IS98 | Amine | Musc. acetylcholine Vertebrate type 5 |
| Am-032 | Q920H4 | Amine | Musc. acetylcholine Vertebrate type 5 |
| Am-032 | P56490 | Amine | Musc. acetylcholine Vertebrate type 5 |
| Am-032 | P08911 | Amine | Musc. acetylcholine Vertebrate type 5 |
| Am-032 | P08912 | Amine | Musc. acetylcholine Vertebrate type 5 |
| Am-033 | P12657 | Amine | Musc. acetylcholine Vertebrate type 1 |
| Am-033 | P11229 | Amine | Musc. acetylcholine Vertebrate type 1 |
| Am-033 | Q5R949 | Amine | Musc. acetylcholine Vertebrate type 1 |
| Am-033 | P08482 | Amine | Musc. acetylcholine Vertebrate type 1 |
| Am-033 | P56489 | Amine | Musc. acetylcholine Vertebrate type 1 |
| Am-033 | P04761 | Amine | Musc. acetylcholine Vertebrate type 1 |
| Am-034 | P28335 | Amine | Serotonin type 1c                     |
| Am-034 | P34968 | Amine | Serotonin type 1c                     |
| Am-034 | Q60F97 | Amine | Serotonin type 1c                     |
| Am-034 | P08909 | Amine | Serotonin type 1c                     |
| Am-034 | Q5IS66 | Amine | Serotonin type 1c                     |
| Am-035 | P97717 | Amine | Alpha Adrenoceptors type 1b           |
| Am-035 | P18841 | Amine | Alpha Adrenoceptors type 1b           |
| Am-035 | P15823 | Amine | Alpha Adrenoceptors type 1b           |
| Am-035 | P35368 | Amine | Alpha Adrenoceptors type 1b           |
| Am-035 | P11615 | Amine | Alpha Adrenoceptors type 1b           |
| Am-036 | P52703 | Amine | Dopamine Vertebrate type 3            |
| Am-036 | Q5IS72 | Amine | Dopamine Vertebrate type 3            |
| Am-036 | P35462 | Amine | Dopamine Vertebrate type 3            |
| Am-036 | P30728 | Amine | Dopamine Vertebrate type 3            |
| Am-036 | P19020 | Amine | Dopamine Vertebrate type 3            |
| Am-037 | Q9TTM9 | Amine | Alpha Adrenoceptors type 1d           |
| Am-037 | P25100 | Amine | Alpha Adrenoceptors type 1d           |
| Am-037 | P23944 | Amine | Alpha Adrenoceptors type 1d           |
| Am-037 | P97714 | Amine | Alpha Adrenoceptors type 1d           |
| Am-037 | O02666 | Amine | Alpha Adrenoceptors type 1d           |
| Am-038 | Q9QYN8 | Amine | Histamine type 3                      |
| Am-038 | P58406 | Amine | Histamine type 3                      |
| Am-038 | Q9JI35 | Amine | Histamine type 3                      |
| Am-038 | Q9Y5N1 | Amine | Histamine type 3                      |
| Am-039 | Q13639 | Amine | Serotonin type 4                      |
| Am-039 | P97288 | Amine | Serotonin type 4                      |
| Am-039 | Q62758 | Amine | Serotonin type 4                      |
| Am-039 | O70528 | Amine | Serotonin type 4                      |

|        |        |       |                             |
|--------|--------|-------|-----------------------------|
| Am-040 | P25115 | Amine | Dopamine Vertebrate type 5  |
| Am-040 | Q8BLD9 | Amine | Dopamine Vertebrate type 5  |
| Am-040 | P42290 | Amine | Dopamine Vertebrate type 5  |
| Am-040 | P21918 | Amine | Dopamine Vertebrate type 5  |
| Am-041 | P30940 | Amine | Serotonin type 1f           |
| Am-041 | P30939 | Amine | Serotonin type 1f           |
| Am-041 | Q02284 | Amine | Serotonin type 1f           |
| Am-041 | O08890 | Amine | Serotonin type 1f           |
| Am-042 | O14804 | Amine | Trace amine type 5          |
| Am-042 | Q5QD23 | Amine | Trace amine type 5          |
| Am-042 | Q5QD28 | Amine | Trace amine type 5          |
| Am-042 | Q5QD14 | Amine | Trace amine type 5          |
| Am-043 | P50406 | Amine | Serotonin type 6            |
| Am-043 | P31388 | Amine | Serotonin type 6            |
| Am-043 | Q5IS65 | Amine | Serotonin type 6            |
| Am-043 | Q9R1C8 | Amine | Serotonin type 6            |
| Am-044 | P47800 | Amine | Dopamine Vertebrate type 1  |
| Am-044 | P53454 | Amine | Dopamine Vertebrate type 1  |
| Am-044 | P42291 | Amine | Dopamine Vertebrate type 1  |
| Am-045 | P35364 | Amine | Serotonin type 5a           |
| Am-045 | P47898 | Amine | Serotonin type 5a           |
| Am-045 | P30966 | Amine | Serotonin type 5a           |
| Am-046 | P30951 | Amine | Trace amine type 9          |
| Am-046 | P35412 | Amine | Trace amine type 9          |
| Am-046 | P47775 | Amine | Trace amine type 9          |
| Am-047 | P32251 | Amine | Alpha Adrenoceptors type 2d |
| Am-047 | Q8JG70 | Amine | Alpha Adrenoceptors type 2d |
| Am-047 | Q8JG69 | Amine | Alpha Adrenoceptors type 2d |
| Am-048 | Q6VB83 | Amine | Serotonin type 1e           |
| Am-048 | P28566 | Amine | Serotonin type 1e           |
| Am-048 | Q9N2B6 | Amine | Serotonin type 1e           |
| Am-049 | Q8K1Q3 | Amine | Trace amine type 9          |
| Am-049 | P46089 | Amine | Trace amine type 9          |
| Am-049 | P35413 | Amine | Trace amine type 9          |
| Am-050 | Q5QD16 | Amine | Trace amine type 3          |
| Am-050 | Q5QD24 | Amine | Trace amine type 3          |
| Am-050 | Q9P1P4 | Amine | Trace amine type 3          |
| Am-051 | Q9P1P5 | Amine | Trace amine type 2          |
| Am-051 | Q5QD17 | Amine | Trace amine type 2          |
| Am-051 | Q5QD25 | Amine | Trace amine type 2          |
| Am-052 | Q8HZ64 | Amine | Trace amine type 1          |
| Am-052 | Q5QD29 | Amine | Trace amine type 1          |
| Am-052 | Q96RJ0 | Amine | Trace amine type 1          |
| Am-053 | Q8IZ08 | Amine | Dopamine Vertebrate type 1  |
| Am-053 | Q7TQP2 | Amine | Dopamine Vertebrate type 1  |

|        |        |                                |                                        |
|--------|--------|--------------------------------|----------------------------------------|
| Am-053 | Q7TQN7 | Amine                          | Dopamine Vertebrate type 1             |
| Am-054 | Q6YNI2 | Amine                          | Trace amine type 9                     |
| Am-054 | P51651 | Amine                          | Trace amine type 9                     |
| Am-054 | P46095 | Amine                          | Trace amine type 9                     |
| Am-055 | Q25322 | Amine                          | Octopamine type 6                      |
| Am-055 | Q25321 | Amine                          | Octopamine type 6                      |
| Am-056 | O95800 | Amine                          | Trace amine type 9                     |
| Am-056 | Q6X632 | Amine                          | Trace amine type 9                     |
| Am-057 | Q16950 | Amine                          | Dopamine Insect type 1                 |
| Am-057 | Q16951 | Amine                          | Dopamine Insect type 1                 |
| Am-058 | Q923Y9 | Amine                          | Trace amine type 1                     |
| Am-058 | Q923Y8 | Amine                          | Trace amine type 1                     |
| Am-059 | P31387 | Amine                          | Serotonin type 5b                      |
| Am-059 | P35365 | Amine                          | Serotonin type 5b                      |
| Am-060 | Q61H86 | Amine                          | Dopamine Other                         |
| Am-060 | Q6RYS9 | Amine                          | Dopamine Other                         |
| Ca-001 | Q98895 | Cannabinoid                    | Cannabinoid type 1                     |
| Ca-001 | Q71SP5 | Cannabinoid                    | Cannabinoid type 1                     |
| Ca-001 | P21554 | Cannabinoid                    | Cannabinoid type 1                     |
| Ca-001 | O02777 | Cannabinoid                    | Cannabinoid type 1                     |
| Ca-001 | P56971 | Cannabinoid                    | Cannabinoid type 1                     |
| Ca-001 | Q333S9 | Cannabinoid                    | Cannabinoid type 1                     |
| Ca-001 | Q801M1 | Cannabinoid                    | Cannabinoid type 1                     |
| Ca-001 | P47746 | Cannabinoid                    | Cannabinoid type 1                     |
| Ca-001 | Q5IS73 | Cannabinoid                    | Cannabinoid type 1                     |
| Ca-001 | Q9PUI7 | Cannabinoid                    | Cannabinoid type 1                     |
| Ca-001 | Q98894 | Cannabinoid                    | Cannabinoid type 1                     |
| Ca-001 | P20272 | Cannabinoid                    | Cannabinoid type 1                     |
| Ca-002 | Q9QZN9 | Cannabinoid                    | Cannabinoid type 2                     |
| Ca-002 | P47936 | Cannabinoid                    | Cannabinoid type 2                     |
| Ca-002 | P34972 | Cannabinoid                    | Cannabinoid type 2                     |
| Go-001 | Q01776 | Gonadotropin-releasing hormone | Gonadotropin-releasing hormone type I  |
| Go-001 | Q9MZI6 | Gonadotropin-releasing hormone | Gonadotropin-releasing hormone type I  |
| Go-001 | P30968 | Gonadotropin-releasing hormone | Gonadotropin-releasing hormone type I  |
| Go-001 | P32236 | Gonadotropin-releasing hormone | Gonadotropin-releasing hormone type I  |
| Go-001 | O18821 | Gonadotropin-releasing hormone | Gonadotropin-releasing hormone type I  |
| Go-001 | P32237 | Gonadotropin-releasing hormone | Gonadotropin-releasing hormone type I  |
| Go-001 | P49922 | Gonadotropin-releasing hormone | Gonadotropin-releasing hormone type I  |
| Go-001 | Q9TTI8 | Gonadotropin-releasing hormone | Gonadotropin-releasing hormone type I  |
| Go-001 | Q8CH60 | Gonadotropin-releasing hormone | Gonadotropin-releasing hormone type I  |
| Go-001 | Q19PY9 | Gonadotropin-releasing hormone | Gonadotropin-releasing hormone type I  |
| Go-001 | P30969 | Gonadotropin-releasing hormone | Gonadotropin-releasing hormone type I  |
| Go-002 | Q95MG6 | Gonadotropin-releasing hormone | Gonadotropin-releasing hormone type II |
| Go-002 | Q95MH6 | Gonadotropin-releasing hormone | Gonadotropin-releasing hormone type II |
| Go-002 | Q95JG1 | Gonadotropin-releasing hormone | Gonadotropin-releasing hormone type II |

|        |        |                                 |                                        |
|--------|--------|---------------------------------|----------------------------------------|
| Go-002 | O42329 | Gonadotropin-releasing hormone  | Gonadotropin-releasing hormone type II |
| Ho-001 | Q95179 | Hormone protein                 | Follicle stimulating hormone           |
| Ho-001 | P23945 | Hormone protein                 | Follicle stimulating hormone           |
| Ho-001 | P79763 | Hormone protein                 | Follicle stimulating hormone           |
| Ho-001 | Q6YNB6 | Hormone protein                 | Follicle stimulating hormone           |
| Ho-001 | P35378 | Hormone protein                 | Follicle stimulating hormone           |
| Ho-001 | P47799 | Hormone protein                 | Follicle stimulating hormone           |
| Ho-001 | Q6R6L8 | Hormone protein                 | Follicle stimulating hormone           |
| Ho-001 | P32212 | Hormone protein                 | Follicle stimulating hormone           |
| Ho-001 | P35379 | Hormone protein                 | Follicle stimulating hormone           |
| Ho-001 | Q8R428 | Hormone protein                 | Follicle stimulating hormone           |
| Ho-001 | P35376 | Hormone protein                 | Follicle stimulating hormone           |
| Ho-001 | Q5GJ04 | Hormone protein                 | Follicle stimulating hormone           |
| Ho-001 | Q7ZTV5 | Hormone protein                 | Follicle stimulating hormone           |
| Ho-001 | P49059 | Hormone protein                 | Follicle stimulating hormone           |
| Ho-001 | P20395 | Hormone protein                 | Follicle stimulating hormone           |
| Ho-001 | O02721 | Hormone protein                 | Lutropin-choriogonadotropic hormone    |
| Ho-001 | P16582 | Hormone protein                 | Lutropin-choriogonadotropic hormone    |
| Ho-001 | Q28005 | Hormone protein                 | Lutropin-choriogonadotropic hormone    |
| Ho-001 | P16235 | Hormone protein                 | Lutropin-choriogonadotropic hormone    |
| Ho-001 | Q28585 | Hormone protein                 | Lutropin-choriogonadotropic hormone    |
| Ho-001 | P30730 | Hormone protein                 | Lutropin-choriogonadotropic hormone    |
| Ho-001 | P22888 | Hormone protein                 | Lutropin-choriogonadotropic hormone    |
| Ho-001 | P56495 | Hormone protein                 | Thyrotropin                            |
| Ho-001 | Q8SPP9 | Hormone protein                 | Thyrotropin                            |
| Ho-001 | Q6QMG1 | Hormone protein                 | Thyrotropin                            |
| Ho-001 | P35409 | Hormone protein                 | Thyrotropin                            |
| Ho-001 | P47750 | Hormone protein                 | Thyrotropin                            |
| Ho-001 | P14763 | Hormone protein                 | Thyrotropin                            |
| Ho-001 | Q27987 | Hormone protein                 | Thyrotropin                            |
| Ho-001 | P21463 | Hormone protein                 | Thyrotropin                            |
| Ho-001 | P16473 | Hormone protein                 | Thyrotropin                            |
| Ho-001 | Q9BGN4 | Hormone protein                 | Thyrotropin                            |
| Hy-001 | P49019 | Hydroxycarboxylic acid receptor | GPR109                                 |
| Hy-001 | Q8TDS4 | Hydroxycarboxylic acid receptor | GPR109                                 |
| Hy-001 | Q9EP66 | Hydroxycarboxylic acid receptor | GPR109                                 |
| Hy-001 | Q80Z39 | Hydroxycarboxylic acid receptor | GPR109                                 |
| Hy-002 | Q9BXC0 | Hydroxycarboxylic acid receptor | GPR81                                  |
| Hy-002 | Q8C131 | Hydroxycarboxylic acid receptor | GPR81                                  |
| Le-001 | Q9JL9  | Leukotriene B4 receptor         | Leukotriene B4 receptor type 2         |
| Le-001 | Q924U0 | Leukotriene B4 receptor         | Leukotriene B4 receptor type 2         |
| Le-001 | Q9NPC1 | Leukotriene B4 receptor         | Leukotriene B4 receptor type 2         |
| Le-002 | Q9R0Q2 | Leukotriene B4 receptor         | Leukotriene B4 receptor type 1         |
| Le-002 | O88855 | Leukotriene B4 receptor         | Leukotriene B4 receptor type 1         |
| Le-003 | Q3T181 | Leukotriene B4 receptor         | Leukotriene B4 receptor type 1         |

|        |        |                                |                                |
|--------|--------|--------------------------------|--------------------------------|
| Le-003 | Q15722 | Leukotriene B4 receptor        | Leukotriene B4 receptor type 1 |
| Ly-001 | Q9DDK4 | Lysosphingolipid and LPA (EDG) | Sphingosine 1-phosphate Edg-1  |
| Ly-001 | P21453 | Lysosphingolipid and LPA (EDG) | Sphingosine 1-phosphate Edg-1  |
| Ly-001 | O08530 | Lysosphingolipid and LPA (EDG) | Sphingosine 1-phosphate Edg-1  |
| Ly-001 | Q5E9P3 | Lysosphingolipid and LPA (EDG) | Sphingosine 1-phosphate Edg-1  |
| Ly-001 | P48303 | Lysosphingolipid and LPA (EDG) | Sphingosine 1-phosphate Edg-1  |
| Ly-002 | Q9I8K8 | Lysosphingolipid and LPA (EDG) | Sphingosine 1-phosphate Edg-5  |
| Ly-002 | P47752 | Lysosphingolipid and LPA (EDG) | Sphingosine 1-phosphate Edg-5  |
| Ly-002 | P52592 | Lysosphingolipid and LPA (EDG) | Sphingosine 1-phosphate Edg-5  |
| Ly-002 | O95136 | Lysosphingolipid and LPA (EDG) | Sphingosine 1-phosphate Edg-5  |
| Ly-003 | Q9HBW0 | Lysosphingolipid and LPA (EDG) | Lysophosphatidic acid Edg-4    |
| Ly-003 | Q9JL06 | Lysosphingolipid and LPA (EDG) | Lysophosphatidic acid Edg-4    |
| Ly-003 | Q95KH4 | Lysosphingolipid and LPA (EDG) | Lysophosphatidic acid Edg-4    |
| Ly-004 | Q9EQQ4 | Lysosphingolipid and LPA (EDG) | GPR45                          |
| Ly-004 | Q9Y5Y3 | Lysosphingolipid and LPA (EDG) | GPR45                          |
| Ly-004 | P79945 | Lysosphingolipid and LPA (EDG) | GPR45                          |
| Ly-005 | Q99500 | Lysosphingolipid and LPA (EDG) | Sphingosine 1-phosphate Edg-3  |
| Ly-005 | Q9Z0U9 | Lysosphingolipid and LPA (EDG) | Sphingosine 1-phosphate Edg-3  |
| Ly-005 | Q9PUQ8 | Lysosphingolipid and LPA (EDG) | Sphingosine 1-phosphate Edg-3  |
| Ly-006 | Q9PU17 | Lysosphingolipid and LPA (EDG) | Lysophosphatidic acid Edg-2    |
| Ly-006 | P61793 | Lysosphingolipid and LPA (EDG) | Lysophosphatidic acid Edg-2    |
| Ly-006 | P61794 | Lysosphingolipid and LPA (EDG) | Lysophosphatidic acid Edg-2    |
| Ly-006 | Q92633 | Lysosphingolipid and LPA (EDG) | Lysophosphatidic acid Edg-2    |
| Ly-006 | Q9PU16 | Lysosphingolipid and LPA (EDG) | Lysophosphatidic acid Edg-2    |
| Ly-006 | Q28031 | Lysosphingolipid and LPA (EDG) | Lysophosphatidic acid Edg-2    |
| Ly-006 | P46628 | Lysosphingolipid and LPA (EDG) | Lysophosphatidic acid Edg-2    |
| Ly-007 | Q9H228 | Lysosphingolipid and LPA (EDG) | Sphingosine 1-phosphate Edg-8  |
| Ly-007 | Q9JKM5 | Lysosphingolipid and LPA (EDG) | Sphingosine 1-phosphate Edg-8  |
| Ly-007 | Q684M3 | Lysosphingolipid and LPA (EDG) | Sphingosine 1-phosphate Edg-8  |
| Ly-007 | Q91X56 | Lysosphingolipid and LPA (EDG) | Sphingosine 1-phosphate Edg-8  |
| Ly-008 | Q9EQ31 | Lysosphingolipid and LPA (EDG) | Lysophosphatidic acid Edg-7    |
| Ly-008 | Q9UBY5 | Lysosphingolipid and LPA (EDG) | Lysophosphatidic acid Edg-7    |
| Ly-008 | Q8K5E0 | Lysosphingolipid and LPA (EDG) | Lysophosphatidic acid Edg-7    |
| Ly-009 | Q9BZJ6 | Lysosphingolipid and LPA (EDG) | GPR63                          |
| Ly-009 | Q9EQQ3 | Lysosphingolipid and LPA (EDG) | GPR63                          |
| Ly-010 | O95977 | Lysosphingolipid and LPA (EDG) | Sphingosine 1-phosphate Edg-6  |
| Ly-010 | Q9Z0L1 | Lysosphingolipid and LPA (EDG) | Sphingosine 1-phosphate Edg-6  |
| Me-001 | P48039 | Melatonin                      | Melatonin type 1               |
| Me-001 | P49217 | Melatonin                      | Melatonin type 1               |
| Me-001 | P51049 | Melatonin                      | Melatonin type 1               |
| Me-001 | Q61184 | Melatonin                      | Melatonin type 1               |
| Me-001 | Q90456 | Melatonin                      | Melatonin type 1               |
| Me-001 | P51050 | Melatonin                      | Melatonin type 1               |
| Me-001 | O02769 | Melatonin                      | Melatonin type 1               |
| Me-001 | P49285 | Melatonin                      | Melatonin type 1               |

|         |        |                                |                                              |
|---------|--------|--------------------------------|----------------------------------------------|
| Me-001  | P48040 | Melatonin                      | Melatonin type 1                             |
| Me-001  | P51046 | Melatonin                      | Melatonin type 1                             |
| Me-002  | P49219 | Melatonin                      | Melatonin type 1                             |
| Me-002  | P49288 | Melatonin                      | Melatonin type 1                             |
| Me-003  | O88495 | Melatonin                      | Melatonin-like (GPR50)                       |
| Me-003  | Q28558 | Melatonin                      | Melatonin-like (GPR50)                       |
| Me-003  | Q13585 | Melatonin                      | Melatonin-like (GPR50)                       |
| Me-004  | P49286 | Melatonin                      | Melatonin type 1                             |
| Me-004  | Q8CIQ6 | Melatonin                      | Melatonin type 1                             |
| Mix-001 | Q6R6I7 | Class A Orphan/other           | LGR like (hormone receptors) type 7 and 8    |
| Mix-001 | Q5XM32 | Class A Orphan/other           | LGR like (hormone receptors) type 7 and 8    |
| Mix-001 | Q6R6I6 | Class A Orphan/other           | LGR like (hormone receptors) type 7 and 8    |
| Mix-001 | Q91ZZ5 | Class A Orphan/other           | LGR like (hormone receptors) type 7 and 8    |
| Mix-001 | Q9HBX9 | Class A Orphan/other           | LGR like (hormone receptors) type 7 and 8    |
| Mix-001 | Q5R5V8 | Class A Orphan/other           | LGR like (hormone receptors) type 7 and 8    |
| Mix-001 | Q8WXD0 | Class A Orphan/other           | LGR like (hormone receptors) type 7 and 8    |
| Mix-001 | P46023 | Hormone protein                | Gonadotropin type I                          |
| Mix-002 | Q923Y7 | Amine                          | Trace amine type 4                           |
| Mix-002 | Q5QD15 | Amine                          | Trace amine type 4                           |
| Mix-002 | Q5QNP2 | Class A Orphan/other           | Other 509                                    |
| Mix-003 | Q14439 | Class A Orphan/other           | ORPH_MSC429                                  |
| Mix-003 | Q80WT4 | Class A Orphan/other           | ORPH_MSC429                                  |
| Mix-003 | Q64017 | Class A Orphan/other           | ORPH_MSC429                                  |
| Mix-004 | Q80T62 | Gonadotropin-releasing hormone | Gonadotropin-releasing hormone type II       |
| Mix-004 | Q96P66 | Peptide                        | C-C Chemokine type 5                         |
| Nu-001  | Q0VC81 | Nucleotide-like                | Adenosine type 3                             |
| Nu-001  | O02667 | Nucleotide-like                | Adenosine type 3                             |
| Nu-001  | P33765 | Nucleotide-like                | Adenosine type 3                             |
| Nu-001  | P35342 | Nucleotide-like                | Adenosine type 3                             |
| Nu-001  | Q28309 | Nucleotide-like                | Adenosine type 3                             |
| Nu-002  | Q9ESG6 | Nucleotide-like                | Purinoreceptor P2RY12-14 GPR87 (UDP-Glucose) |
| Nu-002  | O35881 | Nucleotide-like                | Purinoreceptor P2RY12-14 GPR87 (UDP-Glucose) |
| Nu-002  | Q3SX17 | Nucleotide-like                | Purinoreceptor P2RY12-14 GPR87 (UDP-Glucose) |
| Nu-002  | Q15391 | Nucleotide-like                | Purinoreceptor P2RY12-14 GPR87 (UDP-Glucose) |
| Nu-003  | Q149R9 | Nucleotide-like                | P2RY5                                        |
| Nu-003  | Q3ZC80 | Nucleotide-like                | P2RY5                                        |
| Nu-003  | Q9H1C0 | Nucleotide-like                | P2RY5                                        |
| Nu-004  | Q99MT6 | Nucleotide-like                | Succinate receptors                          |
| Nu-004  | Q6IYF9 | Nucleotide-like                | Succinate receptors                          |
| Nu-004  | Q9BXA5 | Nucleotide-like                | Succinate receptors                          |
| Nu-005  | P28190 | Nucleotide-like                | Adenosine type 1                             |
| Nu-005  | P11616 | Nucleotide-like                | Adenosine type 1                             |
| Nu-005  | P49892 | Nucleotide-like                | Adenosine type 1                             |
| Nu-005  | P34970 | Nucleotide-like                | Adenosine type 1                             |
| Nu-005  | P47745 | Nucleotide-like                | Adenosine type 1                             |

|        |        |                 |                                              |
|--------|--------|-----------------|----------------------------------------------|
| Nu-005 | Q5RF57 | Nucleotide-like | Adenosine type 1                             |
| Nu-005 | Q60612 | Nucleotide-like | Adenosine type 1                             |
| Nu-005 | P30542 | Nucleotide-like | Adenosine type 1                             |
| Nu-005 | P25099 | Nucleotide-like | Adenosine type 1                             |
| Nu-006 | Q60614 | Nucleotide-like | Adenosine type 2                             |
| Nu-006 | P29276 | Nucleotide-like | Adenosine type 2                             |
| Nu-006 | P29275 | Nucleotide-like | Adenosine type 2                             |
| Nu-006 | Q32ZE2 | Nucleotide-like | Adenosine type 2                             |
| Nu-006 | Q1LZD0 | Nucleotide-like | Adenosine type 2                             |
| Nu-006 | O13076 | Nucleotide-like | Adenosine type 2                             |
| Nu-006 | Q6W3F4 | Nucleotide-like | Adenosine type 2                             |
| Nu-007 | Q9JJS7 | Nucleotide-like | P2RY4                                        |
| Nu-007 | P51582 | Nucleotide-like | P2RY4                                        |
| Nu-007 | O35811 | Nucleotide-like | P2RY4                                        |
| Nu-007 | P79928 | Nucleotide-like | P2RY4                                        |
| Nu-008 | Q8BMC0 | Nucleotide-like | P2RY5                                        |
| Nu-008 | P43657 | Nucleotide-like | P2RY5                                        |
| Nu-008 | Q4G072 | Nucleotide-like | P2RY5                                        |
| Nu-008 | P32250 | Nucleotide-like | P2RY9                                        |
| Nu-009 | Q9D8I2 | Nucleotide-like | Purinoreceptor P2RY12-14 GPR87 (UDP-Glucose) |
| Nu-009 | Q6GUG4 | Nucleotide-like | Purinoreceptor P2RY12-14 GPR87 (UDP-Glucose) |
| Nu-009 | Q9BPV8 | Nucleotide-like | Purinoreceptor P2RY12-14 GPR87 (UDP-Glucose) |
| Nu-010 | Q9ERK9 | Nucleotide-like | P2RY3and6                                    |
| Nu-010 | Q63371 | Nucleotide-like | P2RY3and6                                    |
| Nu-010 | Q15077 | Nucleotide-like | P2RY3and6                                    |
| Nu-011 | Q9UNW8 | Nucleotide-like | P2RY5                                        |
| Nu-011 | Q9Z282 | Nucleotide-like | P2RY5                                        |
| Nu-012 | Q61038 | Nucleotide-like | P2RY5                                        |
| Nu-012 | Q8IYL9 | Nucleotide-like | P2RY5                                        |
| Nu-013 | O00398 | Nucleotide-like | P2RY5 other                                  |
| Nu-013 | Q8BFU7 | Nucleotide-like | P2RY5 other                                  |
| Nu-014 | P49651 | Nucleotide-like | P2RY1                                        |
| Nu-014 | P34996 | Nucleotide-like | P2RY1                                        |
| Nu-014 | P49650 | Nucleotide-like | P2RY1                                        |
| Nu-014 | P49652 | Nucleotide-like | P2RY1                                        |
| Nu-014 | P47900 | Nucleotide-like | P2RY1                                        |
| Nu-014 | P48042 | Nucleotide-like | P2RY1                                        |
| Nu-014 | P59902 | Nucleotide-like | P2RY1                                        |
| Nu-015 | P29274 | Nucleotide-like | Adenosine type 2                             |
| Nu-015 | P11617 | Nucleotide-like | Adenosine type 2                             |
| Nu-015 | P30543 | Nucleotide-like | Adenosine type 2                             |
| Nu-015 | Q60613 | Nucleotide-like | Adenosine type 2                             |
| Nu-015 | Q6TLI7 | Nucleotide-like | Adenosine type 2                             |
| Nu-015 | P46616 | Nucleotide-like | Adenosine type 2                             |
| Nu-016 | Q8BUD0 | Nucleotide-like | P2RY5                                        |



|        |        |                 |                                            |
|--------|--------|-----------------|--------------------------------------------|
| Nu-016 | Q4KLH9 | Nucleotide-like | P2RY5                                      |
| Nu-016 | Q1JQB3 | Nucleotide-like | P2RY5                                      |
| Nu-016 | P46093 | Nucleotide-like | P2RY5                                      |
| Nu-016 | P50132 | Nucleotide-like | P2RY5                                      |
| Nu-017 | B3DM66 | Nucleotide-like | Adenosine type 1                           |
| Nu-017 | B2RPY5 | Nucleotide-like | Adenosine type 1                           |
| Nu-017 | Q90X46 | Nucleotide-like | Adenosine type 1                           |
| Nu-017 | Q8N6U8 | Nucleotide-like | Adenosine type 1                           |
| Nu-017 | Q2YDN1 | Nucleotide-like | Adenosine type 1                           |
| Nu-018 | P41232 | Nucleotide-like | P2RY2                                      |
| Nu-018 | Q5YA25 | Nucleotide-like | P2RY2                                      |
| Nu-018 | P41231 | Nucleotide-like | P2RY2                                      |
| Nu-018 | P35383 | Nucleotide-like | P2RY2                                      |
| Nu-019 | Q9CPV9 | Nucleotide-like | Purinoceptor P2RY12-14 GPR87 (UDP-Glucose) |
| Nu-019 | Q9H244 | Nucleotide-like | Purinoceptor P2RY12-14 GPR87 (UDP-Glucose) |
| Nu-019 | Q9EPX4 | Nucleotide-like | Purinoceptor P2RY12-14 GPR87 (UDP-Glucose) |
| Nu-019 | Q95KC3 | Nucleotide-like | Purinoceptor P2RY12-14 GPR87 (UDP-Glucose) |
| Nu-020 | Q8BFQ3 | Nucleotide-like | P2RY5                                      |
| Nu-020 | O46685 | Nucleotide-like | P2RY5                                      |
| Nu-020 | Q15743 | Nucleotide-like | P2RY5                                      |
| Nu-021 | Q6IYF8 | Nucleotide-like | P2RY1                                      |
| Nu-021 | Q6Y1R5 | Nucleotide-like | P2RY1                                      |
| Nu-021 | Q96P68 | Nucleotide-like | P2RY1                                      |
| Nu-022 | A6QLE7 | Nucleotide-like | P2RY5                                      |
| Nu-022 | Q9Y2T5 | Nucleotide-like | P2RY5                                      |
| Nu-022 | P0C5J4 | Nucleotide-like | P2RY5                                      |
| Nu-023 | Q8BG55 | Nucleotide-like | Purinoceptor P2RY12-14 GPR87 (UDP-Glucose) |
| Nu-023 | Q3ZBK9 | Nucleotide-like | Purinoceptor P2RY12-14 GPR87 (UDP-Glucose) |
| Nu-023 | O14626 | Nucleotide-like | Purinoceptor P2RY12-14 GPR87 (UDP-Glucose) |
| Nu-024 | Q99678 | Nucleotide-like | P2RY5                                      |
| Nu-024 | Q8BYC4 | Nucleotide-like | P2RY5                                      |
| Nu-025 | Q98907 | Nucleotide-like | P2RY3and6                                  |
| Nu-025 | O93361 | Nucleotide-like | P2RY3and6                                  |
| Nu-026 | Q61618 | Nucleotide-like | Adenosine type 3                           |
| Nu-026 | P28647 | Nucleotide-like | Adenosine type 3                           |
| Nu-027 | Q99MT7 | Nucleotide-like | Purinoceptor P2RY12-14 GPR87 (UDP-Glucose) |
| Nu-027 | Q9BY21 | Nucleotide-like | Purinoceptor P2RY12-14 GPR87 (UDP-Glucose) |
| Nu-028 | Q8BLG2 | Nucleotide-like | P2RY9                                      |
| Nu-028 | Q99677 | Nucleotide-like | P2RY9                                      |
| Nu-029 | Q99679 | Nucleotide-like | P2RY5                                      |
| Nu-029 | Q8BX79 | Nucleotide-like | P2RY5                                      |
| Nu-030 | Q8BZL4 | Nucleotide-like | Purinoceptor P2RY12-14 GPR87 (UDP-Glucose) |
| Nu-030 | Q99680 | Nucleotide-like | Purinoceptor P2RY12-14 GPR87 (UDP-Glucose) |
| OI-001 | Q60892 | Olfactory       | Olfactory 107                              |
| OI-001 | P23265 | Olfactory       | Olfactory 108                              |

|        |        |           |                                  |
|--------|--------|-----------|----------------------------------|
| OI-001 | Q8NGA2 | Olfactory | Olfactory 71                     |
| OI-001 | Q95157 | Olfactory | Olfactory 71                     |
| OI-001 | O76100 | Olfactory | Olfactory 71                     |
| OI-001 | Q9JHB2 | Olfactory | Olfactory 71                     |
| OI-001 | P35898 | Olfactory | Olfactory 71                     |
| OI-001 | O14581 | Olfactory | Olfactory 71                     |
| OI-001 | Q15622 | Olfactory | Olfactory 71                     |
| OI-002 | Q8NHC7 | Olfactory | Olfactory 183                    |
| OI-002 | Q9UGF5 | Olfactory | Olfactory 201                    |
| OI-002 | Q8NGZ2 | Olfactory | Olfactory 232                    |
| OI-002 | Q8NHC6 | Olfactory | Olfactory 232                    |
| OI-002 | Q96R54 | Olfactory | Olfactory 293                    |
| OI-002 | A6ND48 | Olfactory | Olfactory 86                     |
| OI-002 | Q8NHC5 | Olfactory | Olfactory 86                     |
| OI-003 | Q6IFG1 | Olfactory | Olfactory 240                    |
| OI-003 | Q96RD3 | Olfactory | Olfactory 240                    |
| OI-003 | Q8NGH9 | Olfactory | Olfactory 240                    |
| OI-003 | Q9H346 | Olfactory | Olfactory 241                    |
| OI-003 | P0C646 | Olfactory | Olfactory 241                    |
| OI-003 | Q8NH55 | Olfactory | Olfactory 246                    |
| OI-003 | Q8NH60 | Olfactory | Olfactory 246                    |
| OI-003 | Q8NH57 | Olfactory | Olfactory II fam 12 / MOR250     |
| OI-004 | Q8VFB9 | Olfactory | Olfactory 143                    |
| OI-004 | A6NDH6 | Olfactory | Olfactory 185                    |
| OI-004 | Q8VEX6 | Olfactory | Olfactory 185                    |
| OI-004 | A6NKK0 | Olfactory | Olfactory 185                    |
| OI-004 | A6NHG9 | Olfactory | Olfactory 279                    |
| OI-004 | Q8NGV7 | Olfactory | Olfactory 279                    |
| OI-004 | Q8NGV6 | Olfactory | Olfactory 279                    |
| OI-004 | Q8VEX5 | Olfactory | Olfactory 279                    |
| OI-005 | Q9H341 | Olfactory | Olfactory 133                    |
| OI-005 | Q8NH63 | Olfactory | Olfactory 242                    |
| OI-005 | Q8NGK1 | Olfactory | Olfactory 247                    |
| OI-005 | Q8NGJ5 | Olfactory | Olfactory 247                    |
| OI-005 | Q8NH59 | Olfactory | Olfactory 247                    |
| OI-005 | Q8NGK0 | Olfactory | Olfactory II fam 10 / MOR263-269 |
| OI-006 | Q8NGP6 | Olfactory | Olfactory 225                    |
| OI-006 | Q8NGP3 | Olfactory | Olfactory 225                    |
| OI-006 | Q8NGP4 | Olfactory | Olfactory 225                    |
| OI-006 | Q8VFL5 | Olfactory | Olfactory 226                    |
| OI-006 | Q8NGE7 | Olfactory | Olfactory 290                    |
| OI-006 | Q96RB7 | Olfactory | Olfactory 60                     |
| OI-007 | Q8NG78 | Olfactory | Olfactory 147                    |
| OI-007 | Q15617 | Olfactory | Olfactory 147                    |
| OI-007 | P34983 | Olfactory | Olfactory 147                    |

|        |        |           |                                 |
|--------|--------|-----------|---------------------------------|
| OI-007 | Q60884 | Olfactory | Olfactory 147                   |
| OI-007 | Q60895 | Olfactory | Olfactory 307                   |
| OI-007 | Q15614 | Olfactory | Olfactory 312                   |
| OI-008 | P35896 | Olfactory | Olfactory 70                    |
| OI-008 | P34987 | Olfactory | Olfactory 70                    |
| OI-008 | Q7TRF3 | Olfactory | Olfactory 70                    |
| OI-008 | Q96RA2 | Olfactory | Olfactory 71                    |
| OI-008 | Q8NG98 | Olfactory | Olfactory 71                    |
| OI-009 | Q8NH56 | Olfactory | Olfactory II fam 12 / MOR250    |
| OI-009 | Q8NGF1 | Olfactory | Olfactory II fam 12 / MOR250    |
| OI-009 | Q8NH53 | Olfactory | Olfactory II fam 12 / MOR250    |
| OI-009 | Q8NGI2 | Olfactory | Olfactory II fam 12 / MOR250    |
| OI-009 | Q8NGI0 | Olfactory | Olfactory II fam 12 / MOR250    |
| OI-010 | Q8NGI4 | Olfactory | Olfactory 19                    |
| OI-010 | Q8NGE8 | Olfactory | Olfactory 19                    |
| OI-010 | Q8NGI6 | Olfactory | Olfactory 19                    |
| OI-010 | Q8NGN0 | Olfactory | Olfactory 297                   |
| OI-010 | Q8NGJ1 | Olfactory | Olfactory 92                    |
| OI-011 | Q9Y5P0 | Olfactory | Olfactory 244                   |
| OI-011 | Q9Y5P1 | Olfactory | Olfactory 244                   |
| OI-011 | Q9H339 | Olfactory | Olfactory 244                   |
| OI-011 | Q9H340 | Olfactory | Olfactory 244                   |
| OI-011 | Q9H2C8 | Olfactory | Olfactory 247                   |
| OI-012 | Q96R47 | Olfactory | Olfactory II fam 3 / MOR255     |
| OI-012 | Q6IF42 | Olfactory | Olfactory II fam 3 / MOR255     |
| OI-012 | Q8NGT9 | Olfactory | Olfactory II fam 3 / MOR255     |
| OI-012 | Q96R48 | Olfactory | Olfactory II fam 3 / MOR255     |
| OI-012 | Q8NGT7 | Olfactory | Olfactory II fam 3 / MOR255     |
| OI-013 | Q60881 | Olfactory | Olfactory 219                   |
| OI-013 | Q8NGF8 | Olfactory | Olfactory 219                   |
| OI-013 | Q8NH49 | Olfactory | Olfactory 25                    |
| OI-013 | Q8NGF9 | Olfactory | Olfactory 25                    |
| OI-013 | Q8NH73 | Olfactory | Olfactory 314                   |
| OI-013 | Q8NGB4 | Olfactory | Olfactory 314                   |
| OI-013 | Q8NGL7 | Olfactory | Olfactory 314                   |
| OI-014 | Q8NH43 | Olfactory | Olfactory 118                   |
| OI-014 | Q8NGD5 | Olfactory | Olfactory II fam 8 / MOR161-171 |
| OI-014 | Q8NGC6 | Olfactory | Olfactory II fam 8 / MOR161-171 |
| OI-014 | Q96R72 | Olfactory | Olfactory II fam 8 / MOR161-171 |
| OI-014 | Q8NGD2 | Olfactory | Olfactory II fam 8 / MOR161-171 |
| OI-014 | Q8NGD4 | Olfactory | Olfactory II fam 8 / MOR161-171 |
| OI-015 | Q9H207 | Olfactory | Olfactory 125                   |
| OI-015 | Q9H208 | Olfactory | Olfactory 125                   |
| OI-015 | Q96KK4 | Olfactory | Olfactory 149                   |
| OI-015 | Q8NGE5 | Olfactory | Olfactory 284                   |

|        |        |           |                                         |
|--------|--------|-----------|-----------------------------------------|
| OI-015 | Q9H209 | Olfactory | Olfactory 300                           |
| OI-015 | Q8NH19 | Olfactory | Olfactory 51                            |
| OI-016 | Q8VGS3 | Olfactory | Olfactory 28                            |
| OI-016 | Q8NGP9 | Olfactory | Olfactory 28                            |
| OI-016 | Q60894 | Olfactory | Olfactory 291                           |
| OI-016 | Q8NGR4 | Olfactory | Olfactory 39                            |
| OI-016 | Q8N127 | Olfactory | Olfactory 54                            |
| OI-017 | Q8NH80 | Olfactory | Olfactory II fam 6 / MOR103-105,107-119 |
| OI-017 | Q60888 | Olfactory | Olfactory II fam 6 / MOR103-105,107-119 |
| OI-017 | Q60887 | Olfactory | Olfactory II fam 6 / MOR103-105,107-119 |
| OI-017 | Q8NGN7 | Olfactory | Olfactory II fam 6 / MOR103-105,107-119 |
| OI-017 | Q8VEY3 | Olfactory | Olfactory II fam 6 / MOR103-105,107-119 |
| OI-018 | Q8VG03 | Olfactory | Olfactory II fam 4 / MOR225-248         |
| OI-018 | Q8VFD3 | Olfactory | Olfactory II fam 4 / MOR225-248         |
| OI-018 | Q8VEW5 | Olfactory | Olfactory II fam 4 / MOR225-248         |
| OI-018 | Q8VFD1 | Olfactory | Olfactory II fam 4 / MOR225-248         |
| OI-018 | Q8VFD2 | Olfactory | Olfactory II fam 4 / MOR225-248         |
| OI-019 | Q96RD2 | Olfactory | Olfactory 241                           |
| OI-019 | Q8NGF0 | Olfactory | Olfactory 241                           |
| OI-019 | Q8NGJ2 | Olfactory | Olfactory 304                           |
| OI-019 | Q8NGK2 | Olfactory | Olfactory 91                            |
| OI-020 | Q8NH48 | Olfactory | Olfactory 226                           |
| OI-020 | Q96R08 | Olfactory | Olfactory 226                           |
| OI-020 | Q96R09 | Olfactory | Olfactory 226                           |
| OI-020 | Q8NGF7 | Olfactory | Olfactory 226                           |
| OI-021 | Q8VFC9 | Olfactory | Olfactory 180                           |
| OI-021 | Q8VG44 | Olfactory | Olfactory 180                           |
| OI-021 | Q8VG43 | Olfactory | Olfactory 180                           |
| OI-021 | Q8VG06 | Olfactory | Olfactory II fam 4 / MOR225-248         |
| OI-022 | Q8NH94 | Olfactory | Olfactory 257                           |
| OI-022 | Q8NH93 | Olfactory | Olfactory 257                           |
| OI-022 | Q15612 | Olfactory | Olfactory 258                           |
| OI-022 | Q8NGR8 | Olfactory | Olfactory 259                           |
| OI-023 | Q8NGM8 | Olfactory | Olfactory 129                           |
| OI-023 | Q8NH79 | Olfactory | Olfactory 129                           |
| OI-023 | Q8NGC5 | Olfactory | Olfactory 129                           |
| OI-023 | Q8NH40 | Olfactory | Olfactory 177                           |
| OI-024 | Q8NH54 | Olfactory | Olfactory 15                            |
| OI-024 | Q8NGH8 | Olfactory | Olfactory 15                            |
| OI-024 | P0C7T3 | Olfactory | Olfactory 15                            |
| OI-024 | Q8NGH5 | Olfactory | Olfactory 15                            |
| OI-025 | Q5TZ20 | Olfactory | Olfactory 106                           |
| OI-025 | Q8NGZ4 | Olfactory | Olfactory 106                           |
| OI-025 | Q8N628 | Olfactory | Olfactory 194                           |
| OI-025 | Q8NGZ5 | Olfactory | Olfactory 20                            |

|        |        |           |               |
|--------|--------|-----------|---------------|
| OI-026 | P59922 | Olfactory | Olfactory 106 |
| OI-026 | Q60883 | Olfactory | Olfactory 106 |
| OI-026 | Q8NGV0 | Olfactory | Olfactory 106 |
| OI-026 | Q8NGU4 | Olfactory | Olfactory 295 |
| OI-027 | Q8NGR9 | Olfactory | Olfactory 134 |
| OI-027 | Q8NGS0 | Olfactory | Olfactory 134 |
| OI-027 | Q8NH06 | Olfactory | Olfactory 145 |
| OI-027 | O60431 | Olfactory | Olfactory 71  |
| OI-027 | Q8VFM9 | Olfactory | Olfactory 71  |
| OI-027 | Q8NGA1 | Olfactory | Olfactory 71  |
| OI-028 | O95221 | Olfactory | Olfactory 193 |
| OI-028 | Q8NGC0 | Olfactory | Olfactory 211 |
| OI-028 | Q8VFK7 | Olfactory | Olfactory 226 |
| OI-028 | Q8NGF4 | Olfactory | Olfactory 226 |
| OI-028 | Q9UGF6 | Olfactory | Olfactory 234 |
| OI-029 | O43749 | Olfactory | Olfactory 134 |
| OI-029 | Q96R84 | Olfactory | Olfactory 134 |
| OI-029 | P23266 | Olfactory | Olfactory 134 |
| OI-029 | Q15619 | Olfactory | Olfactory 71  |
| OI-029 | Q8NHA8 | Olfactory | Olfactory 71  |
| OI-030 | Q96R67 | Olfactory | Olfactory 220 |
| OI-030 | Q8NGM1 | Olfactory | Olfactory 25  |
| OI-030 | A6NMZ5 | Olfactory | Olfactory 25  |
| OI-030 | Q8NGP0 | Olfactory | Olfactory 25  |
| OI-030 | A6NHA9 | Olfactory | Olfactory 90  |
| OI-031 | Q96RD1 | Olfactory | Olfactory 229 |
| OI-031 | A6NL08 | Olfactory | Olfactory 320 |
| OI-031 | A6NCV1 | Olfactory | Olfactory 320 |
| OI-031 | Q9NZP0 | Olfactory | Olfactory 320 |
| OI-032 | Q60890 | Olfactory | Olfactory 105 |
| OI-032 | P58173 | Olfactory | Olfactory 105 |
| OI-032 | Q9GZK3 | Olfactory | Olfactory 190 |
| OI-032 | O76000 | Olfactory | Olfactory 192 |
| OI-032 | Q5JQS5 | Olfactory | Olfactory 204 |
| OI-033 | Q8NGC1 | Olfactory | Olfactory 117 |
| OI-033 | Q8NGC9 | Olfactory | Olfactory 206 |
| OI-033 | Q8NGC8 | Olfactory | Olfactory 206 |
| OI-033 | Q8NGC7 | Olfactory | Olfactory 235 |
| OI-033 | Q8NGX0 | Olfactory | Olfactory 316 |
| OI-034 | Q8NGQ2 | Olfactory | Olfactory 103 |
| OI-034 | Q8NGW1 | Olfactory | Olfactory 103 |
| OI-034 | Q6IFH4 | Olfactory | Olfactory 103 |
| OI-034 | P34986 | Olfactory | Olfactory 138 |
| OI-034 | O95007 | Olfactory | Olfactory 156 |
| OI-035 | Q8NGL6 | Olfactory | Olfactory 25  |

|        |        |           |                                 |
|--------|--------|-----------|---------------------------------|
| OI-035 | Q8NGB2 | Olfactory | Olfactory 25                    |
| OI-035 | Q6IF82 | Olfactory | Olfactory 25                    |
| OI-035 | Q8NGN8 | Olfactory | Olfactory 288                   |
| OI-035 | Q8NH72 | Olfactory | Olfactory 45                    |
| OI-036 | A6NJZ3 | Olfactory | Olfactory 320                   |
| OI-036 | A6NM76 | Olfactory | Olfactory 320                   |
| OI-036 | A6NIJ9 | Olfactory | Olfactory 77                    |
| OI-036 | A6NF89 | Olfactory | Olfactory 77                    |
| OI-037 | Q60889 | Olfactory | Olfactory 109                   |
| OI-037 | O95222 | Olfactory | Olfactory 156                   |
| OI-037 | P23270 | Olfactory | Olfactory 156                   |
| OI-037 | Q8NGX8 | Olfactory | Olfactory 187                   |
| OI-037 | Q8NGX9 | Olfactory | Olfactory 252                   |
| OI-038 | Q9Z1V0 | Olfactory | Olfactory 216                   |
| OI-038 | Q8NGN1 | Olfactory | Olfactory 216                   |
| OI-038 | Q8NGE2 | Olfactory | Olfactory 272                   |
| OI-038 | Q8NGE1 | Olfactory | Olfactory 272                   |
| OI-039 | Q8VGI5 | Olfactory | Olfactory 202                   |
| OI-039 | Q8VEZ0 | Olfactory | Olfactory II fam 4 / MOR225-248 |
| OI-039 | Q8WZ94 | Olfactory | Olfactory II fam 4 / MOR225-248 |
| OI-039 | Q8VG42 | Olfactory | Olfactory II fam 4 / MOR225-248 |
| OI-040 | Q60880 | Olfactory | Olfactory 18                    |
| OI-040 | Q8VES2 | Olfactory | Olfactory 18                    |
| OI-040 | Q8VF13 | Olfactory | Olfactory 18                    |
| OI-040 | Q8VFL9 | Olfactory | Olfactory 18                    |
| OI-041 | Q8NGY1 | Olfactory | Olfactory 215                   |
| OI-041 | P30954 | Olfactory | Olfactory 215                   |
| OI-041 | Q8NHC4 | Olfactory | Olfactory 215                   |
| OI-041 | Q8NGY7 | Olfactory | Olfactory 215                   |
| OI-042 | Q8NGL1 | Olfactory | Olfactory 26                    |
| OI-042 | Q8NGL4 | Olfactory | Olfactory 287                   |
| OI-042 | Q8NGL3 | Olfactory | Olfactory 47                    |
| OI-042 | Q8NGK9 | Olfactory | Olfactory 47                    |
| OI-043 | P34985 | Olfactory | Olfactory 228                   |
| OI-043 | Q15620 | Olfactory | Olfactory 68                    |
| OI-043 | Q8NGG6 | Olfactory | Olfactory 68                    |
| OI-043 | Q60882 | Olfactory | Olfactory 68                    |
| OI-044 | Q7TR96 | Olfactory | Olfactory 267                   |
| OI-044 | Q8NGQ1 | Olfactory | Olfactory 29                    |
| OI-044 | POC7N8 | Olfactory | Olfactory 313                   |
| OI-044 | Q8NH87 | Olfactory | Olfactory 313                   |
| OI-045 | Q6IEY1 | Olfactory | Olfactory 218                   |
| OI-045 | O95013 | Olfactory | Olfactory 218                   |
| OI-045 | Q8NGB9 | Olfactory | Olfactory 283                   |
| OI-045 | Q8NGB8 | Olfactory | Olfactory II fam 7 / MOR139-155 |

|        |        |           |                                         |
|--------|--------|-----------|-----------------------------------------|
| OI-046 | Q8N349 | Olfactory | Olfactory 16                            |
| OI-046 | Q8NG80 | Olfactory | Olfactory 16                            |
| OI-046 | Q8NH16 | Olfactory | Olfactory 16                            |
| OI-046 | Q8NGZ0 | Olfactory | Olfactory 16                            |
| OI-047 | P34984 | Olfactory | Olfactory II fam 3 / MOR255             |
| OI-047 | Q96R45 | Olfactory | Olfactory II fam 3 / MOR255             |
| OI-047 | O95047 | Olfactory | Olfactory II fam 3 / MOR255             |
| OI-047 | A4D2G3 | Olfactory | Olfactory II fam 3 / MOR255             |
| OI-048 | P30955 | Olfactory | Olfactory 71                            |
| OI-048 | Q9TQX4 | Olfactory | Olfactory 71                            |
| OI-048 | Q9TU94 | Olfactory | Olfactory 71                            |
| OI-048 | Q9TUA2 | Olfactory | Olfactory 71                            |
| OI-048 | Q9TUA9 | Olfactory | Olfactory 71                            |
| OI-048 | Q8WZA6 | Olfactory | Olfactory II fam 1 / MOR125-138,156     |
| OI-048 | P30953 | Olfactory | Olfactory II fam 1 / MOR125-138,156     |
| OI-048 | P47887 | Olfactory | Olfactory II fam 1 / MOR125-138,156     |
| OI-049 | Q9TU88 | Olfactory | Olfactory II fam 2 / MOR256-262,270-285 |
| OI-049 | Q9TUA0 | Olfactory | Olfactory II fam 2 / MOR256-262,270-285 |
| OI-049 | P47883 | Olfactory | Olfactory II fam 2 / MOR256-262,270-285 |
| OI-049 | P47893 | Olfactory | Olfactory II fam 2 / MOR256-262,270-285 |
| OI-049 | P47888 | Olfactory | Olfactory II fam 2 / MOR256-262,270-285 |
| OI-049 | Q9TU97 | Olfactory | Olfactory II fam 2 / MOR256-262,270-285 |
| OI-049 | Q60891 | Olfactory | Olfactory II fam 2 / MOR256-262,270-285 |
| OI-050 | Q8NG81 | Olfactory | Olfactory 136                           |
| OI-050 | A3KFT3 | Olfactory | Olfactory 136                           |
| OI-050 | Q8NHA4 | Olfactory | Olfactory 136                           |
| OI-050 | Q8NG83 | Olfactory | Olfactory 136                           |
| OI-050 | Q96R27 | Olfactory | Olfactory 136                           |
| OI-050 | Q96R28 | Olfactory | Olfactory 136                           |
| OI-051 | Q8NGT0 | Olfactory | Olfactory 122                           |
| OI-051 | Q8NGS8 | Olfactory | Olfactory 122                           |
| OI-051 | Q8NGS9 | Olfactory | Olfactory 122                           |
| OI-051 | Q8NGT2 | Olfactory | Olfactory 263                           |
| OI-051 | Q8NGV5 | Olfactory | Olfactory 37                            |
| OI-052 | Q8NGN2 | Olfactory | Olfactory 269                           |
| OI-052 | Q8NGN6 | Olfactory | Olfactory II fam 6 / MOR103-105,107-119 |
| OI-052 | Q8NGN4 | Olfactory | Olfactory II fam 6 / MOR103-105,107-119 |
| OI-052 | Q8NGN5 | Olfactory | Olfactory II fam 6 / MOR103-105,107-119 |
| OI-052 | Q8NGN3 | Olfactory | Olfactory II fam 6 / MOR103-105,107-119 |
| OI-053 | O88628 | Olfactory | Olfactory 174                           |
| OI-053 | Q8VBV9 | Olfactory | Olfactory 174                           |
| OI-053 | Q9H255 | Olfactory | Olfactory 174                           |
| OI-053 | Q8NGF3 | Olfactory | Olfactory 248                           |
| OI-053 | Q8TCB6 | Olfactory | Olfactory 75                            |
| OI-054 | Q8VGI1 | Olfactory | Olfactory 71                            |

|        |        |           |                                 |
|--------|--------|-----------|---------------------------------|
| OI-054 | P23274 | Olfactory | Olfactory 71                    |
| OI-054 | P70526 | Olfactory | Olfactory 71                    |
| OI-054 | P23272 | Olfactory | Olfactory 71                    |
| OI-055 | Q8NH04 | Olfactory | Olfactory 34                    |
| OI-055 | P0C7T2 | Olfactory | Olfactory 34                    |
| OI-055 | Q8NHC8 | Olfactory | Olfactory 35                    |
| OI-055 | O43869 | Olfactory | Olfactory 35                    |
| OI-056 | Q96RC9 | Olfactory | Olfactory 64                    |
| OI-056 | Q60886 | Olfactory | Olfactory 64                    |
| OI-056 | Q8NGG8 | Olfactory | Olfactory 64                    |
| OI-056 | Q96RD0 | Olfactory | Olfactory 64                    |
| OI-057 | Q8N162 | Olfactory | Olfactory 82                    |
| OI-057 | Q8N0Y5 | Olfactory | Olfactory 82                    |
| OI-057 | Q8NGG4 | Olfactory | Olfactory 82                    |
| OI-057 | Q8N146 | Olfactory | Olfactory 82                    |
| OI-058 | P0C623 | Olfactory | Olfactory 297                   |
| OI-058 | Q8NGB6 | Olfactory | Olfactory 297                   |
| OI-058 | Q8NH05 | Olfactory | Olfactory 297                   |
| OI-058 | Q8NGD0 | Olfactory | Olfactory 297                   |
| OI-059 | Q8NGA6 | Olfactory | Olfactory 37                    |
| OI-059 | Q9Y4A9 | Olfactory | Olfactory 37                    |
| OI-059 | O60403 | Olfactory | Olfactory 37                    |
| OI-060 | Q9Y3N9 | Olfactory | Olfactory 189                   |
| OI-060 | Q7Z3T1 | Olfactory | Olfactory 73                    |
| OI-060 | Q8NHA6 | Olfactory | Olfactory 73                    |
| OI-061 | Q9UKL2 | Olfactory | Olfactory 120                   |
| OI-061 | A6NMU1 | Olfactory | Olfactory 120                   |
| OI-061 | Q9H2C5 | Olfactory | Olfactory 200                   |
| OI-062 | Q8VG09 | Olfactory | Olfactory II fam 4 / MOR225-248 |
| OI-062 | Q8VG04 | Olfactory | Olfactory II fam 4 / MOR225-248 |
| OI-062 | Q8WZ92 | Olfactory | Olfactory II fam 4 / MOR225-248 |
| OI-063 | Q8NGS1 | Olfactory | Olfactory 71                    |
| OI-063 | Q8NGS2 | Olfactory | Olfactory 71                    |
| OI-063 | Q8VGK5 | Olfactory | Olfactory 87                    |
| OI-064 | O60404 | Olfactory | Olfactory 37                    |
| OI-064 | Q8VBW9 | Olfactory | Olfactory 37                    |
| OI-064 | Q8NGA5 | Olfactory | Olfactory 37                    |
| OI-065 | Q8NH70 | Olfactory | Olfactory 288                   |
| OI-065 | P0C604 | Olfactory | Olfactory 288                   |
| OI-065 | Q8NH83 | Olfactory | Olfactory 288                   |
| OI-066 | Q8NGC4 | Olfactory | Olfactory 269                   |
| OI-066 | Q8NGC3 | Olfactory | Olfactory 269                   |
| OI-066 | Q8NH81 | Olfactory | Olfactory 269                   |
| OI-067 | Q8NH76 | Olfactory | Olfactory 158                   |
| OI-067 | Q8NGI3 | Olfactory | Olfactory 88                    |



|        |        |           |                                 |
|--------|--------|-----------|---------------------------------|
| OI-067 | Q8NGI1 | Olfactory | Olfactory 88                    |
| OI-068 | A6NGY5 | Olfactory | Olfactory 172                   |
| OI-068 | Q8NGJ9 | Olfactory | Olfactory 21                    |
| OI-068 | Q8NH61 | Olfactory | Olfactory 247                   |
| OI-069 | Q8NGG5 | Olfactory | Olfactory 113                   |
| OI-069 | Q8NH51 | Olfactory | Olfactory 57                    |
| OI-069 | Q8NH50 | Olfactory | Olfactory 59                    |
| OI-070 | Q8NGD3 | Olfactory | Olfactory II fam 8 / MOR161-171 |
| OI-070 | Q8NH42 | Olfactory | Olfactory II fam 8 / MOR161-171 |
| OI-070 | Q8NH41 | Olfactory | Olfactory II fam 8 / MOR161-171 |
| OI-071 | Q8NGY2 | Olfactory | Olfactory 251                   |
| OI-071 | Q8NGW6 | Olfactory | Olfactory 251                   |
| OI-071 | Q8NGY3 | Olfactory | Olfactory 251                   |
| OI-072 | Q8NGY0 | Olfactory | Olfactory 210                   |
| OI-072 | Q8NGX3 | Olfactory | Olfactory 210                   |
| OI-072 | Q8NGX6 | Olfactory | Olfactory 214                   |
| OI-073 | Q8NGT5 | Olfactory | Olfactory 129                   |
| OI-073 | Q8NGU2 | Olfactory | Olfactory 129                   |
| OI-073 | Q8NGU1 | Olfactory | Olfactory 129                   |
| OI-074 | Q8NGQ5 | Olfactory | Olfactory 18                    |
| OI-074 | Q8NGE9 | Olfactory | Olfactory 18                    |
| OI-074 | Q8NGQ6 | Olfactory | Olfactory 18                    |
| OI-075 | Q8NGQ4 | Olfactory | Olfactory 227                   |
| OI-075 | Q8NGF6 | Olfactory | Olfactory II fam 3 / MOR255     |
| OI-075 | Q8NGI7 | Olfactory | Olfactory II fam 3 / MOR255     |
| OI-076 | Q8NGP2 | Olfactory | Olfactory 27                    |
| OI-076 | Q8NGG0 | Olfactory | Olfactory 27                    |
| OI-076 | Q8NGG1 | Olfactory | Olfactory 27                    |
| OI-077 | Q8NGG7 | Olfactory | Olfactory 226                   |
| OI-077 | Q8NGM9 | Olfactory | Olfactory 226                   |
| OI-077 | Q60893 | Olfactory | Olfactory 226                   |
| OI-078 | Q8NGK3 | Olfactory | Olfactory 22                    |
| OI-078 | Q8NGK4 | Olfactory | Olfactory 22                    |
| OI-078 | Q8NGK5 | Olfactory | Olfactory 89                    |
| OI-079 | Q8NGG3 | Olfactory | Olfactory 18                    |
| OI-079 | Q8NGG2 | Olfactory | Olfactory 18                    |
| OI-079 | Q8NG75 | Olfactory | Olfactory 18                    |
| OI-080 | Q8IXE1 | Olfactory | Olfactory 297                   |
| OI-080 | Q8N0Y3 | Olfactory | Olfactory 297                   |
| OI-080 | Q8NGD1 | Olfactory | Olfactory 297                   |
| OI-081 | Q8NG95 | Olfactory | Olfactory 71                    |
| OI-081 | Q8NGA0 | Olfactory | Olfactory 71                    |
| OI-081 | Q8NG99 | Olfactory | Olfactory 71                    |
| OI-082 | P23271 | Olfactory | Olfactory 71                    |
| OI-082 | P23273 | Olfactory | Olfactory 71                    |

|        |        |           |                                         |
|--------|--------|-----------|-----------------------------------------|
| OI-082 | P23269 | Olfactory | Olfactory 71                            |
| OI-083 | Q9TU92 | Olfactory | Olfactory 319                           |
| OI-083 | Q9TUA7 | Olfactory | Olfactory 319                           |
| OI-083 | Q9Y585 | Olfactory | Olfactory 319                           |
| OI-083 | Q9P1Q5 | Olfactory | Olfactory 319                           |
| OI-084 | A6NET4 | Olfactory | Olfactory 142                           |
| OI-084 | Q8NHB7 | Olfactory | Olfactory 188                           |
| OI-084 | Q8NHB8 | Olfactory | Olfactory 188                           |
| OI-085 | Q8NH02 | Olfactory | Olfactory II fam 13 / MOR253            |
| OI-085 | Q6IEZ7 | Olfactory | Olfactory II fam 13 / MOR253            |
| OI-085 | Q8NGZ9 | Olfactory | Olfactory II fam 13 / MOR253            |
| OI-085 | Q8NH00 | Olfactory | Olfactory II fam 13 / MOR253            |
| OI-086 | Q8NG97 | Olfactory | Olfactory 23                            |
| OI-086 | A6NH00 | Olfactory | Olfactory 38                            |
| OI-086 | Q8NG76 | Olfactory | Olfactory 38                            |
| OI-086 | Q8NG77 | Olfactory | Olfactory 38                            |
| OI-087 | O76001 | Olfactory | Olfactory 191                           |
| OI-087 | O76002 | Olfactory | Olfactory 191                           |
| OI-087 | Q9GZK6 | Olfactory | Olfactory 191                           |
| OI-088 | Q96R30 | Olfactory | Olfactory 38                            |
| OI-088 | Q8NHB1 | Olfactory | Olfactory 38                            |
| OI-088 | Q8VGD6 | Olfactory | Olfactory 38                            |
| OI-089 | Q8NH64 | Olfactory | Olfactory 209                           |
| OI-089 | Q8NGJ6 | Olfactory | Olfactory 209                           |
| OI-089 | Q8NGJ7 | Olfactory | Olfactory 209                           |
| OI-090 | Q7TS48 | Olfactory | Olfactory 280                           |
| OI-090 | Q8VGQ7 | Olfactory | Olfactory 280                           |
| OI-090 | A6NMS3 | Olfactory | Olfactory 80                            |
| OI-091 | Q8NH85 | Olfactory | Olfactory 224                           |
| OI-091 | P0C617 | Olfactory | Olfactory 224                           |
| OI-091 | Q8VGS1 | Olfactory | Olfactory 224                           |
| OI-092 | Q8NH01 | Olfactory | Olfactory 315                           |
| OI-092 | Q6IF00 | Olfactory | Olfactory 33                            |
| OI-092 | Q8NGX2 | Olfactory | Olfactory 33                            |
| OI-093 | O60412 | Olfactory | Olfactory 217                           |
| OI-093 | O76099 | Olfactory | Olfactory 71                            |
| OI-094 | Q8NH69 | Olfactory | Olfactory II fam 5 / MOR172-224,249,254 |
| OI-094 | Q95155 | Olfactory | Olfactory II fam 5 / MOR172-224,249,254 |
| OI-095 | Q8VFK1 | Olfactory | Olfactory 268                           |
| OI-095 | Q9QY00 | Olfactory | Olfactory 61                            |
| OI-095 | Q8VFK2 | Olfactory | Olfactory 61                            |
| OI-096 | Q8NGR3 | Olfactory | Olfactory 257                           |
| OI-096 | Q8NGR2 | Olfactory | Olfactory 96                            |
| OI-096 | Q8NGR5 | Olfactory | Olfactory 96                            |
| OI-097 | Q8NGY9 | Olfactory | Olfactory 16                            |

|        |        |           |                                 |
|--------|--------|-----------|---------------------------------|
| Ol-097 | Q8NG85 | Olfactory | Olfactory 16                    |
| Ol-097 | Q8NG84 | Olfactory | Olfactory 301                   |
| Ol-098 | Q8VG08 | Olfactory | Olfactory II fam 4 / MOR225-248 |
| Ol-098 | Q8VG05 | Olfactory | Olfactory II fam 4 / MOR225-248 |
| Ol-098 | Q8VG07 | Olfactory | Olfactory II fam 4 / MOR225-248 |
| Ol-099 | P58182 | Olfactory | Olfactory 281                   |
| Ol-099 | Q9UGF7 | Olfactory | Olfactory 281                   |
| Ol-100 | P0C628 | Olfactory | Olfactory 79                    |
| Ol-100 | Q9NZP5 | Olfactory | Olfactory 79                    |
| Ol-101 | A6NDL8 | Olfactory | Olfactory 115                   |
| Ol-101 | Q9NZP2 | Olfactory | Olfactory 320                   |
| Ol-102 | Q8NGS7 | Olfactory | Olfactory 36                    |
| Ol-102 | Q9NQN1 | Olfactory | Olfactory 95                    |
| Ol-103 | Q9H344 | Olfactory | Olfactory 242                   |
| Ol-103 | Q9H343 | Olfactory | Olfactory 243                   |
| Ol-104 | Q8NGH3 | Olfactory | Olfactory 119                   |
| Ol-104 | Q9H210 | Olfactory | Olfactory 238                   |
| Ol-105 | Q9H205 | Olfactory | Olfactory 14                    |
| Ol-105 | A6NM03 | Olfactory | Olfactory 14                    |
| Ol-106 | Q8WZ84 | Olfactory | Olfactory 63                    |
| Ol-106 | Q9GZM6 | Olfactory | Olfactory 63                    |
| Ol-107 | Q95154 | Olfactory | Olfactory 49                    |
| Ol-107 | Q13606 | Olfactory | Olfactory 49                    |
| Ol-108 | Q8VGR8 | Olfactory | Olfactory 58                    |
| Ol-108 | Q8NH18 | Olfactory | Olfactory 58                    |
| Ol-109 | Q8VGI6 | Olfactory | Olfactory II fam 4 / MOR225-248 |
| Ol-109 | Q8VGI4 | Olfactory | Olfactory II fam 4 / MOR225-248 |
| Ol-110 | Q8VEW6 | Olfactory | Olfactory II fam 4 / MOR225-248 |
| Ol-110 | Q8VG13 | Olfactory | Olfactory II fam 4 / MOR225-248 |
| Ol-111 | Q8VFD0 | Olfactory | Olfactory II fam 4 / MOR225-248 |
| Ol-111 | Q8VG02 | Olfactory | Olfactory II fam 4 / MOR225-248 |
| Ol-112 | Q8VFX2 | Olfactory | Olfactory 213                   |
| Ol-112 | A6NL26 | Olfactory | Olfactory 226                   |
| Ol-113 | Q8NGI8 | Olfactory | Olfactory 101                   |
| Ol-113 | Q8VFX4 | Olfactory | Olfactory 101                   |
| Ol-114 | P0C626 | Olfactory | Olfactory 62                    |
| Ol-114 | Q8VF76 | Olfactory | Olfactory 62                    |
| Ol-115 | Q8NH89 | Olfactory | Olfactory 226                   |
| Ol-115 | Q8NH90 | Olfactory | Olfactory 226                   |
| Ol-116 | P58181 | Olfactory | Olfactory 178                   |
| Ol-116 | Q8NH74 | Olfactory | Olfactory 178                   |
| Ol-117 | Q60878 | Olfactory | Olfactory 25                    |
| Ol-117 | Q8NH37 | Olfactory | Olfactory 25                    |
| Ol-118 | P23267 | Olfactory | Olfactory 177                   |
| Ol-118 | Q8NGZ6 | Olfactory | Olfactory 262                   |

|        |        |           |                                         |
|--------|--------|-----------|-----------------------------------------|
| OI-119 | Q8NGX5 | Olfactory | Olfactory 215                           |
| OI-119 | Q6IF99 | Olfactory | Olfactory 215                           |
| OI-120 | Q8NGS4 | Olfactory | Olfactory 37                            |
| OI-120 | Q8NGT1 | Olfactory | Olfactory 37                            |
| OI-121 | Q8NGS5 | Olfactory | Olfactory 36                            |
| OI-121 | Q8NGS6 | Olfactory | Olfactory 36                            |
| OI-122 | Q8NGS3 | Olfactory | Olfactory 71                            |
| OI-122 | Q60879 | Olfactory | Olfactory 71                            |
| OI-123 | Q8NGL9 | Olfactory | Olfactory 17                            |
| OI-123 | Q6IEV9 | Olfactory | Olfactory 17                            |
| OI-124 | Q8NGJ4 | Olfactory | Olfactory 246                           |
| OI-124 | Q8NGJ3 | Olfactory | Olfactory 246                           |
| OI-125 | Q8NGI9 | Olfactory | Olfactory 18                            |
| OI-125 | Q8NGJ0 | Olfactory | Olfactory 18                            |
| OI-126 | Q8NGH7 | Olfactory | Olfactory II fam 12 / MOR250            |
| OI-126 | Q8NGH6 | Olfactory | Olfactory II fam 12 / MOR250            |
| OI-127 | Q60885 | Olfactory | Olfactory 154                           |
| OI-127 | Q8NGE3 | Olfactory | Olfactory 154                           |
| OI-128 | Q8NGC2 | Olfactory | Olfactory 212                           |
| OI-128 | P0C645 | Olfactory | Olfactory 212                           |
| OI-129 | Q6IFN5 | Olfactory | Olfactory 24                            |
| OI-129 | Q0VAX9 | Olfactory | Olfactory 24                            |
| OI-130 | Q5JRS4 | Olfactory | Olfactory 266                           |
| OI-130 | P0C629 | Olfactory | Olfactory 266                           |
| OI-131 | Q8NGZ3 | Olfactory | Olfactory 277                           |
| OI-131 | Q8NGR1 | Olfactory | Olfactory 298                           |
| OI-132 | Q8NGY5 | Olfactory | Olfactory 251                           |
| OI-132 | Q8NGY6 | Olfactory | Olfactory 251                           |
| OI-133 | Q9GZK4 | Olfactory | Olfactory 20                            |
| OI-133 | O95918 | Olfactory | Olfactory 20                            |
| OI-134 | Q15615 | Olfactory | Olfactory 182                           |
| OI-134 | P58180 | Olfactory | Olfactory 40                            |
| OI-135 | O95371 | Olfactory | Olfactory 159                           |
| OI-135 | P23275 | Olfactory | Olfactory 159                           |
| OI-136 | P37072 | Olfactory | Olfactory II fam 5 / MOR172-224,249,254 |
| OI-136 | P37067 | Olfactory | Olfactory II fam 5 / MOR172-224,249,254 |
| OI-136 | P37069 | Olfactory | Olfactory II fam 5 / MOR172-224,249,254 |
| OI-136 | P37071 | Olfactory | Olfactory II fam 5 / MOR172-224,249,254 |
| OI-136 | P37070 | Olfactory | Olfactory II fam 5 / MOR172-224,249,254 |
| OI-136 | P37068 | Olfactory | Olfactory II fam 5 / MOR172-224,249,254 |
| OI-137 | Q9TUA6 | Olfactory | Olfactory 78                            |
| OI-137 | P58170 | Olfactory | Olfactory 78                            |
| OI-137 | P47884 | Olfactory | Olfactory 78                            |
| OI-137 | Q9TU90 | Olfactory | Olfactory 78                            |
| OI-137 | Q9TU95 | Olfactory | Olfactory 78                            |

|        |        |                      |                                           |
|--------|--------|----------------------|-------------------------------------------|
| Ol-138 | Q8NH10 | Olfactory            | Olfactory 152                             |
| Ol-138 | POC7N1 | Olfactory            | Olfactory 152                             |
| Ol-138 | Q8VGR9 | Olfactory            | Olfactory 152                             |
| Ol-138 | POC7N5 | Olfactory            | Olfactory 90                              |
| Ol-139 | Q9TUA4 | Olfactory            | Olfactory II fam 2 / MOR256-262,270-285   |
| Ol-139 | Q9TU89 | Olfactory            | Olfactory II fam 2 / MOR256-262,270-285   |
| Ol-139 | P47881 | Olfactory            | Olfactory II fam 2 / MOR256-262,270-285   |
| Ol-140 | Q9TU93 | Olfactory            | Olfactory 317                             |
| Ol-140 | Q9TUA8 | Olfactory            | Olfactory 317                             |
| Ol-140 | P34982 | Olfactory            | Olfactory 317                             |
| Ol-141 | B2RN74 | Olfactory            | Olfactory 235                             |
| Ol-141 | Q8NG94 | Olfactory            | Olfactory 235                             |
| Ol-141 | Q8NH07 | Olfactory            | Olfactory 235                             |
| Ol-142 | Q13607 | Olfactory            | Olfactory 31                              |
| Ol-142 | Q95156 | Olfactory            | Olfactory 31                              |
| Ol-142 | O95006 | Olfactory            | Olfactory 31                              |
| Ol-143 | Q8NGA8 | Olfactory            | Olfactory II fam 8 / MOR161-171           |
| Ol-143 | Q8NH21 | Olfactory            | Olfactory II fam 8 / MOR161-171           |
| Ol-143 | Q96R69 | Olfactory            | Olfactory II fam 8 / MOR161-171           |
| Ol-144 | Q8NGL0 | Olfactory            | Olfactory 286                             |
| Ol-144 | Q8NGL2 | Olfactory            | Olfactory 286                             |
| Ol-145 | P47890 | Olfactory            | Olfactory 134                             |
| Ol-145 | Q9TU86 | Olfactory            | Olfactory 71                              |
| Ol-146 | Q8NH67 | Olfactory            | Olfactory 285                             |
| Ol-146 | Q8NGK6 | Olfactory            | Olfactory 285                             |
| Ol-147 | Q8NH03 | Olfactory            | Olfactory II fam 13 / MOR253              |
| Ol-147 | Q8NGX1 | Olfactory            | Olfactory II fam 13 / MOR253              |
| Ol-148 | Q8VEW2 | Olfactory            | Olfactory II fam 4 / MOR225-248           |
| Ol-148 | Q8VF12 | Olfactory            | Olfactory II fam 4 / MOR225-248           |
| Ol-149 | Q8VF66 | Olfactory            | Olfactory II fam 4 / MOR225-248           |
| Ol-149 | Q8VF65 | Olfactory            | Olfactory II fam 4 / MOR225-248           |
| Ol-150 | Q8NGQ3 | Olfactory            | Olfactory 71                              |
| Ol-150 | Q8NH92 | Olfactory            | Olfactory 71                              |
| Ol-151 | Q6IEU7 | Olfactory            | Olfactory 60                              |
| Ol-151 | Q8NGP8 | Olfactory            | Olfactory 60                              |
| OT-001 | Q7TN49 | Class A Orphan/other | Mas proto-oncogene and Mas-related (MRGs) |
| OT-001 | Q91WW4 | Class A Orphan/other | Mas proto-oncogene and Mas-related (MRGs) |
| OT-001 | Q91ZC7 | Class A Orphan/other | Mas proto-oncogene and Mas-related (MRGs) |
| OT-001 | Q91ZC6 | Class A Orphan/other | Mas proto-oncogene and Mas-related (MRGs) |
| OT-001 | Q91WW5 | Class A Orphan/other | Mas proto-oncogene and Mas-related (MRGs) |
| OT-002 | Q3UG61 | Class A Orphan/other | Mas proto-oncogene and Mas-related (MRGs) |
| OT-002 | Q3UG50 | Class A Orphan/other | Mas proto-oncogene and Mas-related (MRGs) |
| OT-002 | Q91ZC1 | Class A Orphan/other | Mas proto-oncogene and Mas-related (MRGs) |
| OT-002 | Q3KNA1 | Class A Orphan/other | Mas proto-oncogene and Mas-related (MRGs) |
| OT-003 | Q91ZC5 | Class A Orphan/other | Mas proto-oncogene and Mas-related (MRGs) |

|        |        |                      |                                           |
|--------|--------|----------------------|-------------------------------------------|
| OT-003 | Q91WW2 | Class A Orphan/other | Mas proto-oncogene and Mas-related (MRGs) |
| OT-003 | Q91WW3 | Class A Orphan/other | Mas proto-oncogene and Mas-related (MRGs) |
| OT-003 | Q91ZC4 | Class A Orphan/other | Mas proto-oncogene and Mas-related (MRGs) |
| OT-004 | Q96LB0 | Class A Orphan/other | Mas proto-oncogene and Mas-related (MRGs) |
| OT-004 | Q96LB2 | Class A Orphan/other | Mas proto-oncogene and Mas-related (MRGs) |
| OT-004 | Q96LA9 | Class A Orphan/other | Mas proto-oncogene and Mas-related (MRGs) |
| OT-004 | Q2LL16 | Class A Orphan/other | Mas proto-oncogene and Mas-related (MRGs) |
| OT-005 | Q924T9 | Class A Orphan/other | GPR17                                     |
| OT-005 | Q9NS75 | Class A Orphan/other | GPR17                                     |
| OT-005 | Q920A1 | Class A Orphan/other | GPR17                                     |
| OT-006 | Q86SM5 | Class A Orphan/other | Mas proto-oncogene and Mas-related (MRGs) |
| OT-006 | Q7TN39 | Class A Orphan/other | Mas proto-oncogene and Mas-related (MRGs) |
| OT-006 | Q91ZB5 | Class A Orphan/other | Mas proto-oncogene and Mas-related (MRGs) |
| OT-007 | Q76JU8 | Class A Orphan/other | Free fatty acid receptor 3                |
| OT-007 | Q8K3T4 | Class A Orphan/other | Free fatty acid receptor 3                |
| OT-007 | Q76JU9 | Class A Orphan/other | Free fatty acid receptor 3                |
| OT-008 | Q80SS6 | Class A Orphan/other | G-protein coupled bile acid receptor      |
| OT-008 | Q862A9 | Class A Orphan/other | G-protein coupled bile acid receptor      |
| OT-008 | Q80T02 | Class A Orphan/other | G-protein coupled bile acid receptor      |
| OT-009 | B5X337 | Class A Orphan/other | EBV-induced                               |
| OT-009 | B0UXR0 | Class A Orphan/other | EBV-induced                               |
| OT-009 | A5PLE7 | Class A Orphan/other | EBV-induced                               |
| OT-010 | Q8C010 | Class A Orphan/other | Other 519                                 |
| OT-010 | Q9BZJ8 | Class A Orphan/other | Other 519                                 |
| OT-010 | Q91178 | Class A Orphan/other | Other 519                                 |
| OT-011 | Q8VCK6 | Class A Orphan/other | Free fatty acid receptor 3                |
| OT-011 | Q76EI6 | Class A Orphan/other | Free fatty acid receptor 3                |
| OT-011 | O15552 | Class A Orphan/other | Free fatty acid receptor 3                |
| OT-012 | Q9EPB7 | Class A Orphan/other | GPR88                                     |
| OT-012 | Q9GZN0 | Class A Orphan/other | GPR88                                     |
| OT-012 | Q9ESP4 | Class A Orphan/other | GPR88                                     |
| OT-013 | Q9ES90 | Class A Orphan/other | Other 519                                 |
| OT-013 | Q9HC97 | Class A Orphan/other | Other 519                                 |
| OT-014 | Q9BZJ7 | Class A Orphan/other | Other 519                                 |
| OT-014 | Q80UC6 | Class A Orphan/other | Other 519                                 |
| OT-015 | Q91ZC0 | Class A Orphan/other | Mas proto-oncogene and Mas-related (MRGs) |
| OT-015 | Q91ZB9 | Class A Orphan/other | Mas proto-oncogene and Mas-related (MRGs) |
| OT-016 | Q7TN41 | Class A Orphan/other | Mas proto-oncogene and Mas-related (MRGs) |
| OT-016 | Q91ZB8 | Class A Orphan/other | Mas proto-oncogene and Mas-related (MRGs) |
| OT-017 | Q7TN40 | Class A Orphan/other | Mas proto-oncogene and Mas-related (MRGs) |
| OT-017 | Q91ZB7 | Class A Orphan/other | Mas proto-oncogene and Mas-related (MRGs) |
| OT-018 | Q7TN50 | Class A Orphan/other | Mas proto-oncogene and Mas-related (MRGs) |
| OT-018 | Q7TN51 | Class A Orphan/other | Mas proto-oncogene and Mas-related (MRGs) |
| OT-019 | Q7TN44 | Class A Orphan/other | Mas proto-oncogene and Mas-related (MRGs) |
| OT-019 | Q7TN45 | Class A Orphan/other | Mas proto-oncogene and Mas-related (MRGs) |

|        |        |                      |                                           |
|--------|--------|----------------------|-------------------------------------------|
| OT-020 | Q862A8 | Class A Orphan/other | G-protein coupled bile acid receptor      |
| OT-020 | Q8TDU6 | Class A Orphan/other | G-protein coupled bile acid receptor      |
| OT-021 | Q8TDS7 | Class A Orphan/other | Mas proto-oncogene and Mas-related (MRGs) |
| OT-021 | Q6L786 | Class A Orphan/other | Mas proto-oncogene and Mas-related (MRGs) |
| OT-022 | Q8CIP3 | Class A Orphan/other | Mas proto-oncogene and Mas-related (MRGs) |
| OT-022 | Q8R4G1 | Class A Orphan/other | Mas proto-oncogene and Mas-related (MRGs) |
| OT-023 | Q86SM8 | Class A Orphan/other | Mas proto-oncogene and Mas-related (MRGs) |
| OT-023 | Q5U9D7 | Class A Orphan/other | Mas proto-oncogene and Mas-related (MRGs) |
| OT-024 | Q7TQN9 | Class A Orphan/other | GPR139                                    |
| OT-024 | Q7Z601 | Class A Orphan/other | GPR139                                    |
| OT-025 | Q76JV1 | Class A Orphan/other | Free fatty acid receptor 3                |
| OT-025 | O14842 | Class A Orphan/other | Free fatty acid receptor 3                |
| OT-026 | F8VQN3 | Class A Orphan/other | GPR31                                     |
| OT-026 | O00270 | Class A Orphan/other | GPR31                                     |
| OT-027 | A2ARI4 | Class A Orphan/other | LGR like (hormone receptors) type 4 and 5 |
| OT-027 | O75473 | Class A Orphan/other | LGR like (hormone receptors) type 4 and 5 |
| OT-027 | Q9HBX8 | Class A Orphan/other | LGR like (hormone receptors) type 4 and 5 |
| OT-027 | B0BLW3 | Class A Orphan/other | LGR like (hormone receptors) type 4 and 5 |
| OT-027 | Q3UVD5 | Class A Orphan/other | LGR like (hormone receptors) type 4 and 5 |
| OT-027 | D4AC13 | Class A Orphan/other | LGR like (hormone receptors) type 4 and 5 |
| OT-027 | Q9Z1P4 | Class A Orphan/other | LGR like (hormone receptors) type 4 and 5 |
| OT-027 | Q9BXB1 | Class A Orphan/other | LGR like (hormone receptors) type 4 and 5 |
| OT-027 | Q9Z2H4 | Class A Orphan/other | LGR like (hormone receptors) type 4 and 5 |
| OT-028 | O88280 | Class A Orphan/other | LGR like (hormone receptors) type 4 and 5 |
| OT-028 | O75093 | Class A Orphan/other | LGR like (hormone receptors) type 4 and 5 |
| OT-028 | Q80TR4 | Class A Orphan/other | LGR like (hormone receptors) type 4 and 5 |
| OT-028 | Q9WVB4 | Class A Orphan/other | LGR like (hormone receptors) type 4 and 5 |
| OT-028 | Q9R1B9 | Class A Orphan/other | LGR like (hormone receptors) type 4 and 5 |
| OT-028 | O94813 | Class A Orphan/other | LGR like (hormone receptors) type 4 and 5 |
| OT-028 | O75094 | Class A Orphan/other | LGR like (hormone receptors) type 4 and 5 |
| OT-028 | O88279 | Class A Orphan/other | LGR like (hormone receptors) type 4 and 5 |
| OT-029 | Q5U9D9 | Class A Orphan/other | Mas proto-oncogene and Mas-related (MRGs) |
| OT-029 | Q4QXU4 | Class A Orphan/other | Mas proto-oncogene and Mas-related (MRGs) |
| OT-029 | Q4QXU2 | Class A Orphan/other | Mas proto-oncogene and Mas-related (MRGs) |
| OT-029 | Q96LB1 | Class A Orphan/other | Mas proto-oncogene and Mas-related (MRGs) |
| OT-029 | Q4QXU0 | Class A Orphan/other | Mas proto-oncogene and Mas-related (MRGs) |
| OT-029 | Q4QXU3 | Class A Orphan/other | Mas proto-oncogene and Mas-related (MRGs) |
| OT-029 | Q4QXU5 | Class A Orphan/other | Mas proto-oncogene and Mas-related (MRGs) |
| OT-029 | Q4QXX9 | Class A Orphan/other | Mas proto-oncogene and Mas-related (MRGs) |
| OT-030 | Q9I919 | Class A Orphan/other | SREB                                      |
| OT-030 | P60894 | Class A Orphan/other | SREB                                      |
| OT-030 | P60893 | Class A Orphan/other | SREB                                      |
| OT-030 | P60895 | Class A Orphan/other | SREB                                      |
| OT-030 | Q5RBG7 | Class A Orphan/other | SREB                                      |
| OT-031 | P60019 | Class A Orphan/other | GPR34                                     |

|        |        |                      |                                           |
|--------|--------|----------------------|-------------------------------------------|
| OT-031 | Q9R1K6 | Class A Orphan/other | GPR34                                     |
| OT-031 | Q3SAG9 | Class A Orphan/other | GPR34                                     |
| OT-031 | Q9UPC5 | Class A Orphan/other | GPR34                                     |
| OT-031 | Q6XCF2 | Class A Orphan/other | GPR34                                     |
| OT-032 | Q8K1Z6 | Class A Orphan/other | GPR18                                     |
| OT-032 | Q3T0E9 | Class A Orphan/other | GPR18                                     |
| OT-032 | Q4R613 | Class A Orphan/other | GPR18                                     |
| OT-032 | A1A5S3 | Class A Orphan/other | GPR18                                     |
| OT-032 | Q14330 | Class A Orphan/other | GPR18                                     |
| OT-033 | Q9I918 | Class A Orphan/other | SREB                                      |
| OT-033 | Q9JJH2 | Class A Orphan/other | SREB                                      |
| OT-033 | Q9NS66 | Class A Orphan/other | SREB                                      |
| OT-033 | Q6PI62 | Class A Orphan/other | SREB                                      |
| OT-033 | Q5E9H8 | Class A Orphan/other | SREB                                      |
| OT-034 | Q9Y271 | Class A Orphan/other | Cysteinyl leukotriene type 1              |
| OT-034 | Q99JA4 | Class A Orphan/other | Cysteinyl leukotriene type 1              |
| OT-034 | Q2NNR5 | Class A Orphan/other | Cysteinyl leukotriene type 1              |
| OT-034 | Q924T8 | Class A Orphan/other | Cysteinyl leukotriene type 1              |
| OT-035 | Q3U6B2 | Class A Orphan/other | EBV-induced                               |
| OT-035 | Q1RMI1 | Class A Orphan/other | EBV-induced                               |
| OT-035 | D4A7K7 | Class A Orphan/other | EBV-induced                               |
| OT-035 | P32249 | Class A Orphan/other | EBV-induced                               |
| OT-036 | Q5NUL3 | Class A Orphan/other | Other 512                                 |
| OT-036 | C8YUV0 | Class A Orphan/other | Other 512                                 |
| OT-036 | Q7TMA4 | Class A Orphan/other | Other 512                                 |
| OT-036 | Q2AC31 | Class A Orphan/other | Other 512                                 |
| OT-037 | P11613 | Class A Orphan/other | RDC1                                      |
| OT-037 | P25106 | Class A Orphan/other | RDC1                                      |
| OT-037 | O89039 | Class A Orphan/other | RDC1                                      |
| OT-037 | P56485 | Class A Orphan/other | RDC1                                      |
| OT-038 | Q5U431 | Class A Orphan/other | Other 511                                 |
| OT-038 | B2ZHY2 | Class A Orphan/other | Other 511                                 |
| OT-038 | O43194 | Class A Orphan/other | Other 511                                 |
| OT-038 | B4XF06 | Class A Orphan/other | Other 511                                 |
| OT-039 | Q09QM4 | Class A Orphan/other | GPR17                                     |
| OT-039 | Q13304 | Class A Orphan/other | GPR17                                     |
| OT-039 | Q6NS65 | Class A Orphan/other | GPR17                                     |
| OT-040 | P30554 | Class A Orphan/other | Mas proto-oncogene and Mas-related (MRGs) |
| OT-040 | P12526 | Class A Orphan/other | Mas proto-oncogene and Mas-related (MRGs) |
| OT-040 | P04201 | Class A Orphan/other | Mas proto-oncogene and Mas-related (MRGs) |
| OT-041 | P0C0W8 | Class A Orphan/other | GPR139                                    |
| OT-041 | Q80UC8 | Class A Orphan/other | GPR139                                    |
| OT-041 | Q6DWJ6 | Class A Orphan/other | GPR139                                    |
| OT-042 | Q5QD04 | Class A Orphan/other | GPR3, 6 and 12                            |
| OT-042 | Q96RI9 | Class A Orphan/other | GPR3, 6 and 12                            |



|        |         |                      |                                           |
|--------|---------|----------------------|-------------------------------------------|
| OT-042 | Q923Y6  | Class A Orphan/other | GPR3, 6 and 12                            |
| OT-043 | Q9JJH3  | Class A Orphan/other | SREB                                      |
| OT-043 | Q9NS67  | Class A Orphan/other | SREB                                      |
| OT-043 | O54897  | Class A Orphan/other | SREB                                      |
| OT-044 | Q96AM1  | Class A Orphan/other | Mas proto-oncogene and Mas-related (MRGs) |
| OT-044 | P23749  | Class A Orphan/other | Mas proto-oncogene and Mas-related (MRGs) |
| OT-044 | Q8VCJ6  | Class A Orphan/other | Mas proto-oncogene and Mas-related (MRGs) |
| OT-045 | Q8TDV0  | Class A Orphan/other | GPR151 like                               |
| OT-045 | Q7TSN6  | Class A Orphan/other | GPR151 like                               |
| OT-045 | Q7TSN5  | Class A Orphan/other | GPR151 like                               |
| OT-046 | Q9BXC1  | Class A Orphan/other | Other 519                                 |
| OT-046 | Q3U507  | Class A Orphan/other | Other 519                                 |
| OT-047 | O14843  | Class A Orphan/other | Free fatty acid receptor 3                |
| OT-047 | O15529  | Class A Orphan/other | Free fatty acid receptor 3                |
| OT-048 | Q3UFD7  | Class A Orphan/other | Free fatty acid receptor 3                |
| OT-048 | B2GV46  | Class A Orphan/other | Free fatty acid receptor 3                |
| OT-049 | Q99MT8  | Class A Orphan/other | Mas proto-oncogene and Mas-related (MRGs) |
| OT-049 | Q7TN38  | Class A Orphan/other | Mas proto-oncogene and Mas-related (MRGs) |
| Pe-001 | P79234  | Peptide              | C5a anaphylatoxin                         |
| Pe-001 | P30992  | Peptide              | C5a anaphylatoxin                         |
| Pe-001 | O70129  | Peptide              | C5a anaphylatoxin                         |
| Pe-001 | P79175  | Peptide              | C5a anaphylatoxin                         |
| Pe-001 | P79240  | Peptide              | C5a anaphylatoxin                         |
| Pe-001 | P21730  | Peptide              | C5a anaphylatoxin                         |
| Pe-001 | Q9TUE1  | Peptide              | C5a anaphylatoxin                         |
| Pe-001 | P79188  | Peptide              | C5a anaphylatoxin                         |
| Pe-002 | P46663  | Peptide              | Bradykinin type B1                        |
| Pe-002 | Q95L01  | Peptide              | Bradykinin type B1                        |
| Pe-002 | Q8HZIP2 | Peptide              | Bradykinin type B1                        |
| Pe-002 | Q8HZN9  | Peptide              | Bradykinin type B1                        |
| Pe-002 | Q3BCU0  | Peptide              | Bradykinin type B1                        |
| Pe-002 | P48748  | Peptide              | Bradykinin type B1                        |
| Pe-002 | Q9BDQ5  | Peptide              | Bradykinin type B1                        |
| Pe-002 | Q8HZIP1 | Peptide              | Bradykinin type B1                        |
| Pe-002 | Q8HZIP3 | Peptide              | Bradykinin type B1                        |
| Pe-003 | Q90334  | Peptide              | Isotocin 8                                |
| Pe-003 | P32306  | Peptide              | Mesotocin                                 |
| Pe-003 | Q90252  | Peptide              | Mesotocin                                 |
| Pe-003 | P97926  | Peptide              | Mesotocin                                 |
| Pe-003 | P56449  | Peptide              | Mesotocin                                 |
| Pe-003 | P56494  | Peptide              | Mesotocin                                 |
| Pe-003 | Q28756  | Peptide              | Mesotocin                                 |
| Pe-003 | P30559  | Peptide              | Mesotocin                                 |
| Pe-003 | P70536  | Peptide              | Mesotocin                                 |
| Pe-004 | P16177  | Peptide              | Neuromedin K (NK3)                        |

|        |        |         |                                         |
|--------|--------|---------|-----------------------------------------|
| Pe-004 | O97512 | Peptide | Neuromedin K (NK3)                      |
| Pe-004 | P30098 | Peptide | Neuromedin K (NK3)                      |
| Pe-004 | P47937 | Peptide | Neuromedin K (NK3)                      |
| Pe-004 | P29371 | Peptide | Neuromedin K (NK3)                      |
| Pe-004 | P30974 | Peptide | Tachykinin like 1                       |
| Pe-004 | P30975 | Peptide | Tachykinin like 2                       |
| Pe-005 | P25025 | Peptide | Interleukin-8 type B                    |
| Pe-005 | P35344 | Peptide | Interleukin-8 type B                    |
| Pe-005 | Q28807 | Peptide | Interleukin-8 type B                    |
| Pe-005 | O97571 | Peptide | Interleukin-8 type B                    |
| Pe-005 | Q28519 | Peptide | Interleukin-8 type B                    |
| Pe-005 | Q28422 | Peptide | Interleukin-8 type B                    |
| Pe-006 | P51678 | Peptide | C-C Chemokine type 3                    |
| Pe-006 | O54814 | Peptide | C-C Chemokine type 3                    |
| Pe-006 | Q64H34 | Peptide | C-C Chemokine type 3                    |
| Pe-006 | Q9Z2I3 | Peptide | C-C Chemokine type 3                    |
| Pe-006 | Q89609 | Peptide | C-C Chemokine type 3                    |
| Pe-007 | Q865E5 | Peptide | Melanocortin type 1                     |
| Pe-007 | Q9TU05 | Peptide | Melanocortin type 1                     |
| Pe-007 | Q865E8 | Peptide | Melanocortin type 1                     |
| Pe-007 | P79166 | Peptide | Melanocortin type 1                     |
| Pe-007 | Q865E9 | Peptide | Melanocortin type 1                     |
| Pe-008 | Q9Z1S9 | Peptide | Adrenocorticotropic hormone             |
| Pe-008 | P70115 | Peptide | Adrenocorticotropic hormone             |
| Pe-008 | Q01718 | Peptide | Adrenocorticotropic hormone             |
| Pe-008 | Q64326 | Peptide | Adrenocorticotropic hormone             |
| Pe-009 | P49681 | Peptide | Somatostatin type 5                     |
| Pe-009 | P48145 | Peptide | Somatostatin type 5                     |
| Pe-009 | Q8MJV3 | Peptide | Somatostatin type 5                     |
| Pe-009 | Q56UD9 | Peptide | Somatostatin type 5                     |
| Pe-010 | Q66H29 | Peptide | Melanin-concentrating hormone receptors |
| Pe-010 | Q9UJ42 | Peptide | Melanin-concentrating hormone receptors |
| Pe-010 | Q3U3F9 | Peptide | Melanin-concentrating hormone receptors |
| Pe-011 | Q864F6 | Peptide | Melanocortin type 1                     |
| Pe-011 | Q864F4 | Peptide | Melanocortin type 1                     |
| Pe-011 | Q864F5 | Peptide | Melanocortin type 1                     |
| Pe-012 | Q864J4 | Peptide | Melanocortin type 1                     |
| Pe-012 | Q864J2 | Peptide | Melanocortin type 1                     |
| Pe-012 | Q01726 | Peptide | Melanocortin type 1                     |
| Pe-012 | Q864L0 | Peptide | Melanocortin type 1                     |
| Pe-012 | Q864J8 | Peptide | Melanocortin type 1                     |
| Pe-012 | Q9TUK4 | Peptide | Melanocortin type 1                     |
| Pe-012 | Q864G6 | Peptide | Melanocortin type 1                     |
| Pe-012 | Q864G3 | Peptide | Melanocortin type 1                     |
| Pe-012 | Q864J1 | Peptide | Melanocortin type 1                     |

|        |        |         |                     |
|--------|--------|---------|---------------------|
| Pe-012 | Q864I3 | Peptide | Melanocortin type 1 |
| Pe-012 | Q864I2 | Peptide | Melanocortin type 1 |
| Pe-012 | Q864H7 | Peptide | Melanocortin type 1 |
| Pe-012 | Q864G1 | Peptide | Melanocortin type 1 |
| Pe-012 | Q864K9 | Peptide | Melanocortin type 1 |
| Pe-012 | Q864K1 | Peptide | Melanocortin type 1 |
| Pe-012 | Q864I7 | Peptide | Melanocortin type 1 |
| Pe-012 | Q864H5 | Peptide | Melanocortin type 1 |
| Pe-012 | Q864H9 | Peptide | Melanocortin type 1 |
| Pe-012 | Q864K8 | Peptide | Melanocortin type 1 |
| Pe-012 | Q864J5 | Peptide | Melanocortin type 1 |
| Pe-012 | Q864I9 | Peptide | Melanocortin type 1 |
| Pe-012 | Q864J6 | Peptide | Melanocortin type 1 |
| Pe-012 | Q864I8 | Peptide | Melanocortin type 1 |
| Pe-012 | Q864G9 | Peptide | Melanocortin type 1 |
| Pe-012 | Q864K4 | Peptide | Melanocortin type 1 |
| Pe-012 | Q864I4 | Peptide | Melanocortin type 1 |
| Pe-012 | Q864I0 | Peptide | Melanocortin type 1 |
| Pe-012 | Q864K2 | Peptide | Melanocortin type 1 |
| Pe-012 | Q0Q460 | Peptide | Melanocortin type 1 |
| Pe-012 | Q864K6 | Peptide | Melanocortin type 1 |
| Pe-012 | Q864G4 | Peptide | Melanocortin type 1 |
| Pe-012 | Q864K5 | Peptide | Melanocortin type 1 |
| Pe-012 | Q864I6 | Peptide | Melanocortin type 1 |
| Pe-012 | Q864H2 | Peptide | Melanocortin type 1 |
| Pe-012 | Q864I5 | Peptide | Melanocortin type 1 |
| Pe-012 | Q864H3 | Peptide | Melanocortin type 1 |
| Pe-012 | Q864J3 | Peptide | Melanocortin type 1 |
| Pe-012 | Q864I1 | Peptide | Melanocortin type 1 |
| Pe-012 | Q864H4 | Peptide | Melanocortin type 1 |
| Pe-012 | Q864K0 | Peptide | Melanocortin type 1 |
| Pe-012 | Q864J7 | Peptide | Melanocortin type 1 |
| Pe-012 | Q864G2 | Peptide | Melanocortin type 1 |
| Pe-012 | Q864J9 | Peptide | Melanocortin type 1 |
| Pe-012 | Q864H0 | Peptide | Melanocortin type 1 |
| Pe-012 | Q864J0 | Peptide | Melanocortin type 1 |
| Pe-012 | Q864K3 | Peptide | Melanocortin type 1 |
| Pe-012 | Q864H6 | Peptide | Melanocortin type 1 |
| Pe-013 | Q9N0W7 | Peptide | Endothelin type B   |
| Pe-013 | P21451 | Peptide | Endothelin type B   |
| Pe-013 | P35463 | Peptide | Endothelin type B   |
| Pe-013 | Q90328 | Peptide | Endothelin type B   |
| Pe-013 | P32940 | Peptide | Endothelin type B   |
| Pe-013 | O62709 | Peptide | Endothelin type B   |
| Pe-013 | P48302 | Peptide | Endothelin type B   |

|        |        |         |                                |
|--------|--------|---------|--------------------------------|
| Pe-013 | P28088 | Peptide | Endothelin type B              |
| Pe-013 | P56497 | Peptide | Endothelin type B              |
| Pe-013 | P24530 | Peptide | Endothelin type B              |
| Pe-014 | O19037 | Peptide | Melanocortin type 1            |
| Pe-014 | P55167 | Peptide | Melanocortin type 1            |
| Pe-014 | P56447 | Peptide | Melanocortin type 1            |
| Pe-014 | P56446 | Peptide | Melanocortin type 1            |
| Pe-014 | P56445 | Peptide | Melanocortin type 1            |
| Pe-014 | P56442 | Peptide | Melanocortin type 1            |
| Pe-014 | P56448 | Peptide | Melanocortin type 1            |
| Pe-014 | P47798 | Peptide | Melanocortin type 1            |
| Pe-014 | P56444 | Peptide | Melanocortin type 1            |
| Pe-014 | P56443 | Peptide | Melanocortin type 1            |
| Pe-015 | Q95LF7 | Peptide | Duffy antigen                  |
| Pe-015 | Q95LG5 | Peptide | Duffy antigen                  |
| Pe-015 | Q9QUI6 | Peptide | Duffy antigen                  |
| Pe-015 | Q95LF5 | Peptide | Duffy antigen                  |
| Pe-015 | Q95LF4 | Peptide | Duffy antigen                  |
| Pe-015 | Q16570 | Peptide | Duffy antigen                  |
| Pe-015 | Q95LF2 | Peptide | Duffy antigen                  |
| Pe-015 | Q95LF9 | Peptide | Duffy antigen                  |
| Pe-015 | Q95LF3 | Peptide | Duffy antigen                  |
| Pe-016 | Q8HXX3 | Peptide | Melanocortin type 4            |
| Pe-016 | P56450 | Peptide | Melanocortin type 4            |
| Pe-016 | Q9GLJ8 | Peptide | Melanocortin type 4            |
| Pe-016 | P70596 | Peptide | Melanocortin type 4            |
| Pe-016 | P32245 | Peptide | Melanocortin type 4            |
| Pe-016 | O97504 | Peptide | Melanocortin type 4            |
| Pe-016 | Q0Z8I9 | Peptide | Melanocortin type 4            |
| Pe-016 | B0V1P1 | Peptide | Melanocortin type 4            |
| Pe-017 | P56481 | Peptide | CCK 2                          |
| Pe-017 | P30552 | Peptide | CCK 2                          |
| Pe-017 | P46627 | Peptide | CCK 2                          |
| Pe-017 | P30796 | Peptide | CCK 2                          |
| Pe-017 | P32239 | Peptide | CCK 2                          |
| Pe-017 | P30553 | Peptide | CCK 2                          |
| Pe-017 | P79266 | Peptide | CCK 2                          |
| Pe-017 | P70031 | Peptide | CCK 3                          |
| Pe-018 | Q9TV16 | Peptide | C-X-C Chemokine type 6 (Bonzo) |
| Pe-018 | Q9EQ16 | Peptide | C-X-C Chemokine type 6 (Bonzo) |
| Pe-018 | O19024 | Peptide | C-X-C Chemokine type 6 (Bonzo) |
| Pe-018 | Q9XT45 | Peptide | C-X-C Chemokine type 6 (Bonzo) |
| Pe-018 | Q9N0Z0 | Peptide | C-X-C Chemokine type 6 (Bonzo) |
| Pe-018 | O00574 | Peptide | C-X-C Chemokine type 6 (Bonzo) |
| Pe-018 | O18983 | Peptide | C-X-C Chemokine type 6 (Bonzo) |

|        |        |         |                                |
|--------|--------|---------|--------------------------------|
| Pe-018 | Q9BDS6 | Peptide | C-X-C Chemokine type 6 (Bonzo) |
| Pe-019 | Q2YEG0 | Peptide | Interleukin-8 type A           |
| Pe-019 | P55919 | Peptide | Interleukin-8 type A           |
| Pe-019 | Q2YEG2 | Peptide | Interleukin-8 type A           |
| Pe-019 | P55920 | Peptide | Interleukin-8 type A           |
| Pe-019 | P21109 | Peptide | Interleukin-8 type A           |
| Pe-019 | P25024 | Peptide | Interleukin-8 type A           |
| Pe-019 | Q2YEF9 | Peptide | Interleukin-8 type A           |
| Pe-019 | Q28003 | Peptide | Interleukin-8 type B           |
| Pe-020 | Q6H2Y3 | Peptide | Bombesin type 3                |
| Pe-020 | O97967 | Peptide | Bombesin type 3                |
| Pe-020 | P35371 | Peptide | Bombesin type 3                |
| Pe-020 | O54798 | Peptide | Bombesin type 3                |
| Pe-020 | Q8K418 | Peptide | Bombesin type 3                |
| Pe-020 | P32247 | Peptide | Bombesin type 3                |
| Pe-020 | P47751 | Peptide | Bombesin type 4                |
| Pe-021 | Q9WTV8 | Peptide | Vasopressin type 1a            |
| Pe-021 | P48043 | Peptide | Vasopressin type 1a            |
| Pe-021 | Q62463 | Peptide | Vasopressin type 1a            |
| Pe-021 | P30560 | Peptide | Vasopressin type 1a            |
| Pe-021 | Q9WTV9 | Peptide | Vasopressin type 1a            |
| Pe-021 | P37288 | Peptide | Vasopressin type 1a            |
| Pe-021 | Q90352 | Peptide | Vasotocin                      |
| Pe-022 | P30558 | Peptide | Proteinase-activated type 1    |
| Pe-022 | P25116 | Peptide | Proteinase-activated type 1    |
| Pe-022 | P56488 | Peptide | Proteinase-activated type 1    |
| Pe-022 | P47749 | Peptide | Proteinase-activated type 1    |
| Pe-022 | P26824 | Peptide | Proteinase-activated type 1    |
| Pe-022 | A7YY44 | Peptide | Proteinase-activated type 1    |
| Pe-022 | Q00991 | Peptide | Proteinase-activated type 1    |
| Pe-023 | P21462 | Peptide | Fmet-leu-phe                   |
| Pe-023 | Q05394 | Peptide | Fmet-leu-phe                   |
| Pe-023 | P79235 | Peptide | Fmet-leu-phe                   |
| Pe-023 | P79176 | Peptide | Fmet-leu-phe                   |
| Pe-023 | P79189 | Peptide | Fmet-leu-phe                   |
| Pe-023 | P33766 | Peptide | Fmet-leu-phe                   |
| Pe-023 | P79241 | Peptide | Fmet-leu-phe                   |
| Pe-024 | Q28929 | Peptide | Angiotensin type 2             |
| Pe-024 | P35374 | Peptide | Angiotensin type 2             |
| Pe-024 | P50052 | Peptide | Angiotensin type 2             |
| Pe-024 | P35351 | Peptide | Angiotensin type 2             |
| Pe-024 | Q9Z0Z6 | Peptide | Angiotensin type 2             |
| Pe-025 | Q2Y2P0 | Peptide | C-C Chemokine type 1           |
| Pe-025 | P51675 | Peptide | C-C Chemokine type 1           |
| Pe-025 | P51676 | Peptide | C-C Chemokine type 1           |

|        |        |         |                              |
|--------|--------|---------|------------------------------|
| Pe-025 | P32246 | Peptide | C-C Chemokine type 1         |
| Pe-025 | P56482 | Peptide | C-C Chemokine type 1         |
| Pe-026 | Q6BD04 | Peptide | Kiss receptor (GPR54)        |
| Pe-026 | Q91V45 | Peptide | Kiss receptor (GPR54)        |
| Pe-026 | Q969F8 | Peptide | Kiss receptor (GPR54)        |
| Pe-026 | Q924U1 | Peptide | Kiss receptor (GPR54)        |
| Pe-027 | P35346 | Peptide | Somatostatin type 5          |
| Pe-027 | O08858 | Peptide | Somatostatin type 5          |
| Pe-027 | P30938 | Peptide | Somatostatin type 5          |
| Pe-028 | Q695P6 | Peptide | C5a anaphylatoxin C5L2       |
| Pe-028 | Q9P296 | Peptide | C5a anaphylatoxin C5L2       |
| Pe-028 | Q8BW93 | Peptide | C5a anaphylatoxin C5L2       |
| Pe-029 | P34974 | Peptide | Adrenocorticotrophic hormone |
| Pe-029 | Q9TU77 | Peptide | Adrenocorticotrophic hormone |
| Pe-029 | Q8HYN8 | Peptide | Adrenocorticotrophic hormone |
| Pe-030 | P43142 | Peptide | Adrenomedullin (G10D) 1      |
| Pe-030 | O15218 | Peptide | Adrenomedullin (G10D) 1      |
| Pe-030 | P31392 | Peptide | Adrenomedullin (G10D) 1      |
| Pe-031 | O88853 | Peptide | Galanin type 3               |
| Pe-031 | O60755 | Peptide | Galanin type 3               |
| Pe-031 | O88626 | Peptide | Galanin type 3               |
| Pe-032 | Q9MZV8 | Peptide | Melanocortin type 5          |
| Pe-032 | P56451 | Peptide | Melanocortin type 5          |
| Pe-032 | P41983 | Peptide | Melanocortin type 5          |
| Pe-033 | Q2KTE1 | Peptide | C-X3-C Chemokine             |
| Pe-033 | A6QNL7 | Peptide | C-X3-C Chemokine             |
| Pe-033 | P49238 | Peptide | C-X3-C Chemokine             |
| Pe-034 | Q8VIH9 | Peptide | Urotensin II                 |
| Pe-034 | P49220 | Peptide | Urotensin II                 |
| Pe-034 | P49684 | Peptide | Urotensin II                 |
| Pe-035 | Q01727 | Peptide | Melanocortin type 1          |
| Pe-035 | Q80SS9 | Peptide | Melanocortin type 1          |
| Pe-035 | Q80SZ5 | Peptide | Melanocortin type 1          |
| Pe-036 | Q99463 | Peptide | Neuropeptide Y / peptide YY  |
| Pe-036 | Q61212 | Peptide | Neuropeptide Y / peptide YY  |
| Pe-036 | P79217 | Peptide | Neuropeptide Y / peptide YY  |
| Pe-037 | O88634 | Peptide | Proteinase-activated type 4  |
| Pe-037 | Q920E0 | Peptide | Proteinase-activated type 4  |
| Pe-037 | Q96RI0 | Peptide | Proteinase-activated type 4  |
| Pe-038 | O00590 | Peptide | C-C Chemokine type D6        |
| Pe-038 | O08707 | Peptide | C-C Chemokine type D6        |
| Pe-038 | O09027 | Peptide | C-C Chemokine type D6        |
| Pe-039 | O35457 | Peptide | C-C Chemokine 102            |
| Pe-039 | Q9XSD7 | Peptide | C-C Chemokine type 2-like    |
| Pe-039 | O00421 | Peptide | C-C Chemokine type 2-like    |

|        |        |         |                             |
|--------|--------|---------|-----------------------------|
| Pe-040 | O55040 | Peptide | Neuromedin U                |
| Pe-040 | Q9JJI5 | Peptide | Neuromedin U                |
| Pe-040 | Q9HB89 | Peptide | Neuromedin U                |
| Pe-041 | P56484 | Peptide | C-C Chemokine type 8        |
| Pe-041 | P51685 | Peptide | C-C Chemokine type 8        |
| Pe-041 | O97665 | Peptide | C-C Chemokine type 8        |
| Pe-042 | P0C7U4 | Peptide | C5a anaphylatoxin           |
| Pe-042 | Q2WED0 | Peptide | C5a anaphylatoxin           |
| Pe-043 | Q08520 | Peptide | C-C Chemokine type 8        |
| Pe-043 | P32229 | Peptide | C-C Chemokine type 8        |
| Pe-044 | P0C5I1 | Peptide | GPR25                       |
| Pe-044 | O00155 | Peptide | GPR25                       |
| Pe-045 | A4FUQ5 | Peptide | Fmet-leu-phe                |
| Pe-045 | O88537 | Peptide | Fmet-leu-phe                |
| Pe-046 | Q9ROM1 | Peptide | XC Chemokine                |
| Pe-046 | P46094 | Peptide | XC Chemokine                |
| Pe-047 | P46092 | Peptide | C-C Chemokine type 10       |
| Pe-047 | Q9JL21 | Peptide | C-C Chemokine type 10       |
| Pe-048 | Q8TDU9 | Peptide | Relaxin-3 type 2            |
| Pe-048 | Q7TQP4 | Peptide | Relaxin-3 type 2            |
| Pe-049 | O75388 | Peptide | Fmet-leu-phe                |
| Pe-049 | Q8NGA4 | Peptide | Fmet-leu-phe                |
| Pe-050 | Q8MJV2 | Peptide | Somatostatin type 5         |
| Pe-050 | P48146 | Peptide | Somatostatin type 5         |
| Pe-051 | Q86VZ1 | Peptide | Proteinase-activated type 2 |
| Pe-051 | Q5ZI82 | Peptide | Proteinase-activated type 2 |
| Pe-052 | Q75ZH0 | Peptide | C-C Chemokine type 2-like   |
| Pe-052 | Q0II78 | Peptide | C-C Chemokine type 2-like   |
| Pe-053 | Q6UNA4 | Peptide | C5a anaphylatoxin           |
| Pe-053 | P0C7U5 | Peptide | C5a anaphylatoxin           |
| Pe-054 | Q95NC7 | Peptide | C-C Chemokine type 5        |
| Pe-054 | O97879 | Peptide | C-C Chemokine type 5        |
| Pe-054 | P56493 | Peptide | C-C Chemokine type 5        |
| Pe-054 | Q95NC4 | Peptide | C-C Chemokine type 5        |
| Pe-054 | Q95NC1 | Peptide | C-C Chemokine type 5        |
| Pe-054 | O08556 | Peptide | C-C Chemokine type 5        |
| Pe-054 | Q2HJ17 | Peptide | C-C Chemokine type 5        |
| Pe-054 | O62743 | Peptide | C-C Chemokine type 5        |
| Pe-054 | Q9XT76 | Peptide | C-C Chemokine type 5        |
| Pe-054 | Q95NC9 | Peptide | C-C Chemokine type 5        |
| Pe-054 | Q5ECR9 | Peptide | C-C Chemokine type 5        |
| Pe-054 | P68269 | Peptide | C-C Chemokine type 5        |
| Pe-054 | P61815 | Peptide | C-C Chemokine type 5        |
| Pe-054 | P51681 | Peptide | C-C Chemokine type 5        |
| Pe-054 | Q9TV49 | Peptide | C-C Chemokine type 5        |

|        |        |         |                        |
|--------|--------|---------|------------------------|
| Pe-054 | P56440 | Peptide | C-C Chemokine type 5   |
| Pe-054 | O97883 | Peptide | C-C Chemokine type 5   |
| Pe-054 | Q95NC3 | Peptide | C-C Chemokine type 5   |
| Pe-054 | P61814 | Peptide | C-C Chemokine type 5   |
| Pe-054 | Q95NC8 | Peptide | C-C Chemokine type 5   |
| Pe-054 | Q95ND2 | Peptide | C-C Chemokine type 5   |
| Pe-054 | Q9TV45 | Peptide | C-C Chemokine type 5   |
| Pe-054 | O97878 | Peptide | C-C Chemokine type 5   |
| Pe-054 | P68270 | Peptide | C-C Chemokine type 5   |
| Pe-054 | P61756 | Peptide | C-C Chemokine type 5   |
| Pe-054 | O97882 | Peptide | C-C Chemokine type 5   |
| Pe-054 | Q9TV48 | Peptide | C-C Chemokine type 5   |
| Pe-054 | Q95NC6 | Peptide | C-C Chemokine type 5   |
| Pe-054 | Q1ZY22 | Peptide | C-C Chemokine type 5   |
| Pe-054 | P61757 | Peptide | C-C Chemokine type 5   |
| Pe-054 | Q95ND1 | Peptide | C-C Chemokine type 5   |
| Pe-054 | Q9TV43 | Peptide | C-C Chemokine type 5   |
| Pe-054 | Q9BGN6 | Peptide | C-C Chemokine type 5   |
| Pe-054 | O97880 | Peptide | C-C Chemokine type 5   |
| Pe-054 | O97881 | Peptide | C-C Chemokine type 5   |
| Pe-054 | Q8HZT9 | Peptide | C-C Chemokine type 5   |
| Pe-054 | P51682 | Peptide | C-C Chemokine type 5   |
| Pe-054 | Q9TV42 | Peptide | C-C Chemokine type 5   |
| Pe-054 | O97962 | Peptide | C-C Chemokine type 5   |
| Pe-054 | Q95NC0 | Peptide | C-C Chemokine type 5   |
| Pe-054 | P61755 | Peptide | C-C Chemokine type 5   |
| Pe-054 | P60574 | Peptide | C-C Chemokine type 5   |
| Pe-054 | O97975 | Peptide | C-C Chemokine type 5   |
| Pe-054 | Q95NE8 | Peptide | C-C Chemokine type 5   |
| Pe-054 | P61813 | Peptide | C-C Chemokine type 5   |
| Pe-054 | P56439 | Peptide | C-C Chemokine type 5   |
| Pe-054 | Q9TV47 | Peptide | C-C Chemokine type 5   |
| Pe-054 | Q95NC2 | Peptide | C-C Chemokine type 5   |
| Pe-054 | Q95ND0 | Peptide | C-C Chemokine type 5   |
| Pe-054 | Q6WN98 | Peptide | C-C Chemokine type 5   |
| Pe-054 | Q95NC5 | Peptide | C-C Chemokine type 5   |
| Pe-055 | P61072 | Peptide | C-X-C Chemokine type 4 |
| Pe-055 | Q8HZU0 | Peptide | C-X-C Chemokine type 4 |
| Pe-055 | P25930 | Peptide | C-X-C Chemokine type 4 |
| Pe-055 | P70658 | Peptide | C-X-C Chemokine type 4 |
| Pe-055 | P56491 | Peptide | C-X-C Chemokine type 4 |
| Pe-055 | Q764M9 | Peptide | C-X-C Chemokine type 4 |
| Pe-055 | O08565 | Peptide | C-X-C Chemokine type 4 |
| Pe-055 | P79394 | Peptide | C-X-C Chemokine type 4 |
| Pe-055 | Q9TSQ8 | Peptide | C-X-C Chemokine type 4 |



|        |        |         |                        |
|--------|--------|---------|------------------------|
| Pe-055 | Q28474 | Peptide | C-X-C Chemokine type 4 |
| Pe-055 | Q8HZU1 | Peptide | C-X-C Chemokine type 4 |
| Pe-055 | Q3LSL6 | Peptide | C-X-C Chemokine type 4 |
| Pe-055 | P56498 | Peptide | C-X-C Chemokine type 4 |
| Pe-055 | P61073 | Peptide | C-X-C Chemokine type 4 |
| Pe-055 | Q7YS92 | Peptide | C-X-C Chemokine type 4 |
| Pe-055 | O62747 | Peptide | C-X-C Chemokine type 4 |
| Pe-056 | Q9WV26 | Peptide | Angiotensin type 1     |
| Pe-056 | P29754 | Peptide | Angiotensin type 1     |
| Pe-056 | P43240 | Peptide | Angiotensin type 1     |
| Pe-056 | P25095 | Peptide | Angiotensin type 1     |
| Pe-056 | P30555 | Peptide | Angiotensin type 1     |
| Pe-056 | Q9GLN9 | Peptide | Angiotensin type 1     |
| Pe-056 | P34976 | Peptide | Angiotensin type 1     |
| Pe-056 | P29089 | Peptide | Angiotensin type 1     |
| Pe-056 | O77590 | Peptide | Angiotensin type 1     |
| Pe-056 | P29755 | Peptide | Angiotensin type 1     |
| Pe-056 | P33396 | Peptide | Angiotensin type 1     |
| Pe-056 | P25104 | Peptide | Angiotensin type 1     |
| Pe-056 | O35210 | Peptide | Angiotensin type 1     |
| Pe-056 | P30556 | Peptide | Angiotensin type 1     |
| Pe-056 | P79785 | Peptide | Angiotensin type 1     |
| Pe-057 | Q95247 | Peptide | Opioid type M          |
| Pe-057 | P79350 | Peptide | Opioid type M          |
| Pe-057 | Q9MYW9 | Peptide | Opioid type M          |
| Pe-057 | P33535 | Peptide | Opioid type M          |
| Pe-057 | Q5IS84 | Peptide | Opioid type M          |
| Pe-057 | Q95M54 | Peptide | Opioid type M          |
| Pe-057 | Q5IS39 | Peptide | Opioid type M          |
| Pe-057 | P35372 | Peptide | Opioid type M          |
| Pe-057 | P42866 | Peptide | Opioid type M          |
| Pe-058 | Q1RMU8 | Peptide | Neuropeptide Y type 1  |
| Pe-058 | P25929 | Peptide | Neuropeptide Y type 1  |
| Pe-058 | Q04573 | Peptide | Neuropeptide Y type 1  |
| Pe-058 | P34992 | Peptide | Neuropeptide Y type 1  |
| Pe-058 | O02835 | Peptide | Neuropeptide Y type 1  |
| Pe-058 | Q9WVD0 | Peptide | Neuropeptide Y type 1  |
| Pe-058 | O02813 | Peptide | Neuropeptide Y type 1  |
| Pe-058 | P21555 | Peptide | Neuropeptide Y type 1  |
| Pe-059 | Q8K458 | Peptide | Prokineticin receptors |
| Pe-059 | Q8R416 | Peptide | Prokineticin receptors |
| Pe-059 | Q8TCW9 | Peptide | Prokineticin receptors |
| Pe-059 | Q8SPN1 | Peptide | Prokineticin receptors |
| Pe-059 | Q8R415 | Peptide | Prokineticin receptors |
| Pe-059 | Q9JKL1 | Peptide | Prokineticin receptors |

|        |        |         |                                |
|--------|--------|---------|--------------------------------|
| Pe-059 | Q8SPN2 | Peptide | Prokineticin receptors         |
| Pe-059 | Q8NFJ6 | Peptide | Prokineticin receptors         |
| Pe-060 | Q5IS62 | Peptide | Neuropeptide Y type 2          |
| Pe-060 | P97295 | Peptide | Neuropeptide Y type 2          |
| Pe-060 | Q9DDN6 | Peptide | Neuropeptide Y type 2          |
| Pe-060 | P49146 | Peptide | Neuropeptide Y type 2          |
| Pe-060 | Q9Z2D5 | Peptide | Neuropeptide Y type 2          |
| Pe-060 | O02836 | Peptide | Neuropeptide Y type 2          |
| Pe-060 | Q9GK74 | Peptide | Neuropeptide Y type 2          |
| Pe-060 | P79113 | Peptide | Neuropeptide Y type 2          |
| Pe-061 | P16610 | Peptide | Substance K (NK2)              |
| Pe-061 | P05363 | Peptide | Substance K (NK2)              |
| Pe-061 | Q64077 | Peptide | Substance K (NK2)              |
| Pe-061 | Q5DUB2 | Peptide | Substance K (NK2)              |
| Pe-061 | P21452 | Peptide | Substance K (NK2)              |
| Pe-061 | P51144 | Peptide | Substance K (NK2)              |
| Pe-061 | P30549 | Peptide | Substance K (NK2)              |
| Pe-061 | P79218 | Peptide | Substance K (NK2)              |
| Pe-062 | Q0GBZ5 | Peptide | Orexin type 1                  |
| Pe-062 | P58307 | Peptide | Orexin type 1                  |
| Pe-062 | O43613 | Peptide | Orexin type 1                  |
| Pe-062 | P56718 | Peptide | Orexin type 1                  |
| Pe-062 | O43614 | Peptide | Orexin type 2                  |
| Pe-062 | P58308 | Peptide | Orexin type 2                  |
| Pe-062 | P56719 | Peptide | Orexin type 2                  |
| Pe-062 | Q9TUP7 | Peptide | Orexin type 2                  |
| Pe-063 | Q61614 | Peptide | Endothelin type A              |
| Pe-063 | P26684 | Peptide | Endothelin type A              |
| Pe-063 | Q95L55 | Peptide | Endothelin type A              |
| Pe-063 | Q5KSU9 | Peptide | Endothelin type A              |
| Pe-063 | P21450 | Peptide | Endothelin type A              |
| Pe-063 | Q29010 | Peptide | Endothelin type A              |
| Pe-063 | P25101 | Peptide | Endothelin type A              |
| Pe-064 | Q5DUB3 | Peptide | Substance P (NK1)              |
| Pe-064 | Q98982 | Peptide | Substance P (NK1)              |
| Pe-064 | P25103 | Peptide | Substance P (NK1)              |
| Pe-064 | P14600 | Peptide | Substance P (NK1)              |
| Pe-064 | Q5DUB1 | Peptide | Substance P (NK1)              |
| Pe-064 | P30548 | Peptide | Substance P (NK1)              |
| Pe-064 | P30547 | Peptide | Substance P (NK1)              |
| Pe-065 | Q0VDU3 | Peptide | APJ like Non Vertebrate type 1 |
| Pe-065 | Q9BG77 | Peptide | GPR15                          |
| Pe-065 | Q9BDS7 | Peptide | GPR15                          |
| Pe-065 | P56412 | Peptide | GPR15                          |
| Pe-065 | P49685 | Peptide | GPR15                          |

|        |        |         |                        |
|--------|--------|---------|------------------------|
| Pe-065 | O18982 | Peptide | GPR15                  |
| Pe-065 | O97663 | Peptide | GPR15                  |
| Pe-066 | O88680 | Peptide | C3a anaphylatoxin      |
| Pe-066 | Q16581 | Peptide | C3a anaphylatoxin      |
| Pe-066 | O55197 | Peptide | C3a anaphylatoxin      |
| Pe-066 | Q6TAC8 | Peptide | C3a anaphylatoxin      |
| Pe-066 | Q5REI5 | Peptide | C3a anaphylatoxin      |
| Pe-066 | O09047 | Peptide | C3a anaphylatoxin      |
| Pe-067 | O88410 | Peptide | C-X-C Chemokine type 3 |
| Pe-067 | Q867B2 | Peptide | C-X-C Chemokine type 3 |
| Pe-067 | P49682 | Peptide | C-X-C Chemokine type 3 |
| Pe-067 | Q9JII9 | Peptide | C-X-C Chemokine type 3 |
| Pe-067 | Q5MD61 | Peptide | C-X-C Chemokine type 3 |
| Pe-067 | Q5KSK8 | Peptide | C-X-C Chemokine type 3 |
| Pe-068 | O08786 | Peptide | CCK 1                  |
| Pe-068 | Q63931 | Peptide | CCK 1                  |
| Pe-068 | P30551 | Peptide | CCK 1                  |
| Pe-068 | O97772 | Peptide | CCK 1                  |
| Pe-068 | P32238 | Peptide | CCK 1                  |
| Pe-068 | Q5D0K2 | Peptide | CCK 1                  |
| Pe-069 | Q00788 | Peptide | Vasopressin type 2     |
| Pe-069 | O77808 | Peptide | Vasopressin type 2     |
| Pe-069 | P48044 | Peptide | Vasopressin type 2     |
| Pe-069 | P32307 | Peptide | Vasopressin type 2     |
| Pe-069 | P30518 | Peptide | Vasopressin type 2     |
| Pe-069 | O88721 | Peptide | Vasopressin type 2     |
| Pe-070 | Q28642 | Peptide | Bradykinin type B2     |
| Pe-070 | O70526 | Peptide | Bradykinin type B2     |
| Pe-070 | P25023 | Peptide | Bradykinin type B2     |
| Pe-070 | Q9GLX8 | Peptide | Bradykinin type B2     |
| Pe-070 | P32299 | Peptide | Bradykinin type B2     |
| Pe-070 | P30411 | Peptide | Bradykinin type B2     |
| Pe-071 | P30874 | Peptide | Somatostatin type 2    |
| Pe-071 | P34993 | Peptide | Somatostatin type 2    |
| Pe-071 | P30875 | Peptide | Somatostatin type 2    |
| Pe-071 | P34994 | Peptide | Somatostatin type 2    |
| Pe-071 | P30680 | Peptide | Somatostatin type 2    |
| Pe-071 | Q49LX6 | Peptide | Somatostatin type 2    |
| Pe-072 | P35370 | Peptide | Opioid type X          |
| Pe-072 | P79292 | Peptide | Opioid type X          |
| Pe-072 | P35377 | Peptide | Opioid type X          |
| Pe-072 | P41146 | Peptide | Opioid type X          |
| Pe-072 | P47748 | Peptide | Opioid type X          |
| Pe-073 | B1PHQ8 | Peptide | Fmet-leu-phe           |
| Pe-073 | B9VR26 | Peptide | Fmet-leu-phe           |

|        |        |         |                                         |
|--------|--------|---------|-----------------------------------------|
| Pe-073 | Q99788 | Peptide | Fmet-leu-phe                            |
| Pe-073 | P97468 | Peptide | Fmet-leu-phe                            |
| Pe-073 | O35786 | Peptide | Fmet-leu-phe                            |
| Pe-074 | Q2KIP6 | Peptide | Opioid type K                           |
| Pe-074 | P41144 | Peptide | Opioid type K                           |
| Pe-074 | P34975 | Peptide | Opioid type K                           |
| Pe-074 | P41145 | Peptide | Opioid type K                           |
| Pe-074 | P33534 | Peptide | Opioid type K                           |
| Pe-075 | P25089 | Peptide | Fmet-leu-phe                            |
| Pe-075 | P79191 | Peptide | Fmet-leu-phe                            |
| Pe-075 | P79243 | Peptide | Fmet-leu-phe                            |
| Pe-075 | P79178 | Peptide | Fmet-leu-phe                            |
| Pe-075 | P79237 | Peptide | Fmet-leu-phe                            |
| Pe-076 | P79177 | Peptide | Fmet-leu-phe                            |
| Pe-076 | P79236 | Peptide | Fmet-leu-phe                            |
| Pe-076 | P79190 | Peptide | Fmet-leu-phe                            |
| Pe-076 | P25090 | Peptide | Fmet-leu-phe                            |
| Pe-076 | P79242 | Peptide | Fmet-leu-phe                            |
| Pe-077 | Q15761 | Peptide | Neuropeptide Y type 5                   |
| Pe-077 | O62729 | Peptide | Neuropeptide Y type 5                   |
| Pe-077 | O70342 | Peptide | Neuropeptide Y type 5                   |
| Pe-077 | O97969 | Peptide | Neuropeptide Y type 5                   |
| Pe-077 | Q63634 | Peptide | Neuropeptide Y type 5                   |
| Pe-078 | Q8MJ89 | Peptide | Melanin-concentrating hormone receptors |
| Pe-078 | P97639 | Peptide | Melanin-concentrating hormone receptors |
| Pe-078 | Q8JZL2 | Peptide | Melanin-concentrating hormone receptors |
| Pe-078 | Q5IJ49 | Peptide | Melanin-concentrating hormone receptors |
| Pe-078 | Q99705 | Peptide | Melanin-concentrating hormone receptors |
| Pe-079 | P46090 | Peptide | Fmet-leu-phe                            |
| Pe-079 | O97664 | Peptide | Fmet-leu-phe                            |
| Pe-079 | P46091 | Peptide | Fmet-leu-phe                            |
| Pe-079 | Q8K087 | Peptide | Fmet-leu-phe                            |
| Pe-079 | Q95LH1 | Peptide | Fmet-leu-phe                            |
| Pe-080 | Q8BZ39 | Peptide | Neuromedin U                            |
| Pe-080 | Q9ESQ4 | Peptide | Neuromedin U                            |
| Pe-080 | Q58CW4 | Peptide | Neuromedin U                            |
| Pe-080 | Q9GZQ4 | Peptide | Neuromedin U                            |
| Pe-081 | Q8BZP8 | Peptide | Vasotocin                               |
| Pe-081 | Q6W5P4 | Peptide | Vasotocin                               |
| Pe-081 | P0C0L6 | Peptide | Vasotocin                               |
| Pe-081 | Q56H79 | Peptide | Vasotocin                               |
| Pe-082 | O60883 | Peptide | GPR37 / endothelin B-like               |
| Pe-082 | Q9QYC5 | Peptide | GPR37 / endothelin B-like               |
| Pe-082 | Q17QD8 | Peptide | GPR37 / endothelin B-like               |
| Pe-082 | Q99JG2 | Peptide | GPR37 / endothelin B-like               |

|        |        |         |                                     |
|--------|--------|---------|-------------------------------------|
| Pe-083 | Q63645 | Peptide | Proteinase-activated type 2         |
| Pe-083 | Q2HJA4 | Peptide | Proteinase-activated type 2         |
| Pe-083 | P55086 | Peptide | Proteinase-activated type 2         |
| Pe-083 | P55085 | Peptide | Proteinase-activated type 2         |
| Pe-084 | O18793 | Peptide | C-C Chemokine type 2                |
| Pe-084 | P41597 | Peptide | C-C Chemokine type 2                |
| Pe-084 | P51683 | Peptide | C-C Chemokine type 2                |
| Pe-084 | O55193 | Peptide | C-C Chemokine type 2                |
| Pe-085 | P30873 | Peptide | Somatostatin type 1                 |
| Pe-085 | P30872 | Peptide | Somatostatin type 1                 |
| Pe-085 | P28646 | Peptide | Somatostatin type 1                 |
| Pe-085 | Q49LX5 | Peptide | Somatostatin type 1                 |
| Pe-086 | O97666 | Peptide | APJ like type 1                     |
| Pe-086 | Q9JHG3 | Peptide | APJ like type 1                     |
| Pe-086 | Q9WV08 | Peptide | APJ like type 1                     |
| Pe-086 | P35414 | Peptide | APJ like type 1                     |
| Pe-087 | Q9BDS8 | Peptide | C-C Chemokine type 3                |
| Pe-087 | P56483 | Peptide | C-C Chemokine type 3                |
| Pe-087 | P51677 | Peptide | C-C Chemokine type 3                |
| Pe-087 | P56492 | Peptide | C-C Chemokine type 3                |
| Pe-088 | Q4EW11 | Peptide | Prolactin-releasing peptide (GPR10) |
| Pe-088 | P49683 | Peptide | Prolactin-releasing peptide (GPR10) |
| Pe-088 | Q6VMN6 | Peptide | Prolactin-releasing peptide (GPR10) |
| Pe-088 | Q64121 | Peptide | Prolactin-releasing peptide (GPR10) |
| Pe-089 | P52500 | Peptide | Gastrin-releasing peptide receptor  |
| Pe-089 | P21729 | Peptide | Gastrin-releasing peptide receptor  |
| Pe-089 | P30550 | Peptide | Gastrin-releasing peptide receptor  |
| Pe-090 | P70585 | Peptide | Somatostatin type 5                 |
| Pe-090 | Q61121 | Peptide | Somatostatin type 5                 |
| Pe-090 | Q15760 | Peptide | Somatostatin type 5                 |
| Pe-091 | Q924I3 | Peptide | C-C Chemokine type 11               |
| Pe-091 | P35350 | Peptide | C-C Chemokine type 11               |
| Pe-091 | Q9NPB9 | Peptide | C-C Chemokine type 11               |
| Pe-092 | Q49SQ3 | Peptide | Chemokine receptor-like 1           |
| Pe-092 | Q49SQ1 | Peptide | Chemokine receptor-like 1           |
| Pe-092 | Q49SQ2 | Peptide | Chemokine receptor-like 1           |
| Pe-093 | Q29154 | Peptide | Melanocortin type 1                 |
| Pe-093 | Q6A155 | Peptide | Melanocortin type 1                 |
| Pe-093 | O77616 | Peptide | Melanocortin type 1                 |
| Pe-094 | O88854 | Peptide | Galanin type 2                      |
| Pe-094 | O43603 | Peptide | Galanin type 2                      |
| Pe-094 | O08726 | Peptide | Galanin type 2                      |
| Pe-095 | Q9Z2J6 | Peptide | Fmet-leu-phe                        |
| Pe-095 | Q9Y5Y4 | Peptide | Fmet-leu-phe                        |
| Pe-095 | Q6XKD3 | Peptide | Fmet-leu-phe                        |

|        |        |         |                                |
|--------|--------|---------|--------------------------------|
| Pe-096 | O08878 | Peptide | Chemokine receptor-like 2      |
| Pe-096 | Q8BMP4 | Peptide | Chemokine receptor-like 2      |
| Pe-096 | Q99527 | Peptide | Chemokine receptor-like 2      |
| Pe-097 | P33533 | Peptide | Opioid type D                  |
| Pe-097 | P41143 | Peptide | Opioid type D                  |
| Pe-097 | P32300 | Peptide | Opioid type D                  |
| Pe-098 | Q4VA82 | Peptide | APJ like Non Vertebrate type 1 |
| Pe-098 | Q2TAD5 | Peptide | APJ like Non Vertebrate type 1 |
| Pe-098 | P79960 | Peptide | APJ like Non Vertebrate type 1 |
| Pe-099 | Q9WU02 | Peptide | Vasopressin type 1b            |
| Pe-099 | P47901 | Peptide | Vasopressin type 1b            |
| Pe-099 | P48974 | Peptide | Vasopressin type 1b            |
| Pe-100 | Q9QY42 | Peptide | GPR37 / endothelin B-like      |
| Pe-100 | O15354 | Peptide | GPR37 / endothelin B-like      |
| Pe-100 | Q9QYC6 | Peptide | GPR37 / endothelin B-like      |
| Pe-101 | P51679 | Peptide | C-C Chemokine type 4           |
| Pe-101 | Q8MJW8 | Peptide | C-C Chemokine type 4           |
| Pe-101 | P51680 | Peptide | C-C Chemokine type 4           |
| Pe-102 | Q63447 | Peptide | Neuropeptide Y type 4          |
| Pe-102 | P50391 | Peptide | Neuropeptide Y type 4          |
| Pe-102 | Q61041 | Peptide | Neuropeptide Y type 4          |
| Pe-103 | P49660 | Peptide | Somatostatin type 4            |
| Pe-103 | P30937 | Peptide | Somatostatin type 4            |
| Pe-103 | P31391 | Peptide | Somatostatin type 4            |
| Pe-104 | P32248 | Peptide | C-C Chemokine type 7           |
| Pe-104 | P47774 | Peptide | C-C Chemokine type 7           |
| Pe-104 | Q5MD62 | Peptide | C-C Chemokine type 7           |
| Pe-105 | Q2T9S0 | Peptide | Melanocortin type 1            |
| Pe-105 | Q60HC2 | Peptide | Melanocortin type 1            |
| Pe-105 | Q13509 | Peptide | Melanocortin type 1            |
| Pe-106 | Q1WLP9 | Peptide | C-C Chemokine type 9           |
| Pe-106 | P51686 | Peptide | C-C Chemokine type 9           |
| Pe-106 | Q9WUT7 | Peptide | C-C Chemokine type 9           |
| Pe-107 | Q04683 | Peptide | C-X-C Chemokine type 5         |
| Pe-107 | P32302 | Peptide | C-X-C Chemokine type 5         |
| Pe-107 | P34997 | Peptide | C-X-C Chemokine type 5         |
| Pe-108 | Q96P65 | Peptide | Orexigenic neuropeptide QRFP   |
| Pe-108 | P83858 | Peptide | Orexigenic neuropeptide QRFP   |
| Pe-108 | P83861 | Peptide | Orexigenic neuropeptide QRFP   |
| Pe-109 | O95665 | Peptide | Neurotensin type 2             |
| Pe-109 | P70310 | Peptide | Neurotensin type 2             |
| Pe-109 | Q63384 | Peptide | Neurotensin type 2             |
| Pe-110 | Q924H0 | Peptide | Neuropeptide FF type 2         |
| Pe-110 | Q9Y5X5 | Peptide | Neuropeptide FF type 2         |
| Pe-110 | Q9EQD2 | Peptide | Neuropeptide FF type 2         |

|        |        |         |                                         |
|--------|--------|---------|-----------------------------------------|
| Pe-111 | P47211 | Peptide | Galanin type 1                          |
| Pe-111 | P56479 | Peptide | Galanin type 1                          |
| Pe-111 | Q62805 | Peptide | Galanin type 1                          |
| Pe-112 | Q7ZXJ7 | Peptide | C-X-C Chemokine type 4                  |
| Pe-112 | Q9YGC3 | Peptide | C-X-C Chemokine type 4                  |
| Pe-112 | Q07FZ4 | Peptide | C-X-C Chemokine type 4                  |
| Pe-113 | P30731 | Peptide | GPR83 like                              |
| Pe-113 | Q9TTQ9 | Peptide | GPR83 like                              |
| Pe-113 | Q9NYM4 | Peptide | GPR83 like                              |
| Pe-114 | Q8CIM5 | Peptide | Kiss receptor (GPR54)                   |
| Pe-114 | Q9NQS5 | Peptide | Kiss receptor (GPR54)                   |
| Pe-114 | Q2KI97 | Peptide | Kiss receptor (GPR54)                   |
| Pe-115 | P32745 | Peptide | Somatostatin type 3                     |
| Pe-115 | P30935 | Peptide | Somatostatin type 3                     |
| Pe-115 | P30936 | Peptide | Somatostatin type 3                     |
| Pe-116 | Q8MJ88 | Peptide | Melanin-concentrating hormone receptors |
| Pe-116 | Q969V1 | Peptide | Melanin-concentrating hormone receptors |
| Pe-116 | Q8SQ54 | Peptide | Melanin-concentrating hormone receptors |
| Pe-117 | P28336 | Peptide | Neuromedin B receptor                   |
| Pe-117 | P24053 | Peptide | Neuromedin B receptor                   |
| Pe-117 | O54799 | Peptide | Neuromedin B receptor                   |
| Pe-118 | P20789 | Peptide | Neurotensin type 1                      |
| Pe-118 | O88319 | Peptide | Neurotensin type 1                      |
| Pe-118 | P30989 | Peptide | Neurotensin type 1                      |
| Pe-119 | Q863H8 | Peptide | Duffy antigen                           |
| Pe-119 | Q9GLX0 | Peptide | Duffy antigen                           |
| Pe-120 | P70612 | Peptide | Interleukin-8 type A                    |
| Pe-120 | Q810W6 | Peptide | Interleukin-8 type A                    |
| Pe-121 | Q9NSD7 | Peptide | Relaxin-3 type 1                        |
| Pe-121 | Q8BGE9 | Peptide | Relaxin-3 type 1                        |
| Pe-122 | Q6NV75 | Peptide | Melanin-concentrating hormone receptors |
| Pe-122 | Q8K0Z9 | Peptide | Melanin-concentrating hormone receptors |
| Pe-123 | P32303 | Peptide | Angiotensin type 1                      |
| Pe-123 | P35373 | Peptide | Angiotensin type 1                      |
| Pe-124 | Q8BXS7 | Peptide | Melanin-concentrating hormone receptors |
| Pe-124 | Q8TDT2 | Peptide | Melanin-concentrating hormone receptors |
| Pe-125 | Q29J90 | Peptide | Melanin-concentrating hormone receptors |
| Pe-125 | Q9W534 | Peptide | Melanin-concentrating hormone receptors |
| Pe-126 | Q58D85 | Peptide | Proteinase-activated type 3             |
| Pe-126 | O00254 | Peptide | Proteinase-activated type 3             |
| Pe-127 | P30993 | Peptide | C5a anaphylatoxin                       |
| Pe-127 | P97520 | Peptide | C5a anaphylatoxin                       |
| Pe-128 | B3G515 | Peptide | Chemokine receptor-like 2               |
| Pe-128 | B0F9W3 | Peptide | Chemokine receptor-like 2               |
| Pe-129 | P32244 | Peptide | Melanocortin type 3                     |

|        |        |                            |                                         |
|--------|--------|----------------------------|-----------------------------------------|
| Pe-129 | P33033 | Peptide                    | Melanocortin type 3                     |
| Pe-130 | P51684 | Peptide                    | C-C Chemokine type 6                    |
| Pe-130 | O54689 | Peptide                    | C-C Chemokine type 6                    |
| Pe-131 | Q71MR7 | Peptide                    | Fmet-leu-phe                            |
| Pe-131 | Q3SXG2 | Peptide                    | Fmet-leu-phe                            |
| Pe-132 | Q16538 | Peptide                    | Melanin-concentrating hormone receptors |
| Pe-132 | Q3UN16 | Peptide                    | Melanin-concentrating hormone receptors |
| Pe-133 | P33032 | Peptide                    | Melanocortin type 5                     |
| Pe-133 | Q9TT23 | Peptide                    | Melanocortin type 5                     |
| Pe-134 | O88416 | Peptide                    | Chemokine receptor-like 1               |
| Pe-134 | Q49SP8 | Peptide                    | Chemokine receptor-like 1               |
| Pe-135 | Q8HYC3 | Peptide                    | Urotensin II                            |
| Pe-135 | Q9UKP6 | Peptide                    | Urotensin II                            |
| Pe-136 | P41149 | Peptide                    | Melanocortin type 5                     |
| Pe-136 | P35345 | Peptide                    | Melanocortin type 5                     |
| Pe-137 | P35411 | Peptide                    | C-X3-C Chemokine                        |
| Pe-137 | Q9Z0D9 | Peptide                    | C-X3-C Chemokine                        |
| Pe-138 | A0T2N3 | Peptide                    | APJ like 3                              |
| Pe-138 | Q7SZP9 | Peptide                    | APJ like 3                              |
| Pe-139 | P97583 | Peptide                    | Bradykinin type B1                      |
| Pe-139 | Q61125 | Peptide                    | Bradykinin type B1                      |
| Pe-140 | Q96P67 | Peptide                    | Angiotensin type 1                      |
| Pe-140 | Q8BZR0 | Peptide                    | Angiotensin type 1                      |
| Pe-141 | O08790 | Peptide                    | Fmet-leu-phe                            |
| Pe-141 | O88536 | Peptide                    | Fmet-leu-phe                            |
| Pe-142 | Q864F8 | Peptide                    | Melanocortin type 1                     |
| Pe-142 | Q864F7 | Peptide                    | Melanocortin type 1                     |
| Pe-143 | Q9EP86 | Peptide                    | Neuropeptide FF type 1                  |
| Pe-143 | Q9GZQ6 | Peptide                    | Neuropeptide FF type 1                  |
| Pe-144 | P35343 | Peptide                    | Interleukin-8 type B                    |
| Pe-144 | P35407 | Peptide                    | Interleukin-8 type B                    |
| Pe-145 | O08675 | Peptide                    | Proteinase-activated type 3             |
| Pe-145 | Q920E1 | Peptide                    | Proteinase-activated type 3             |
| Pl-001 | P21556 | Platelet activating factor | Platelet activating factor              |
| Pl-001 | Q9TTY5 | Platelet activating factor | Platelet activating factor              |
| Pl-001 | Q62035 | Platelet activating factor | Platelet activating factor              |
| Pl-001 | Q9XSD4 | Platelet activating factor | Platelet activating factor              |
| Pl-001 | P25105 | Platelet activating factor | Platelet activating factor              |
| Pl-001 | Q9GK76 | Platelet activating factor | Platelet activating factor              |
| Pl-001 | P46002 | Platelet activating factor | Platelet activating factor              |
| Pr-001 | P35375 | Prostanoid                 | Prostaglandin E2 subtype EP1            |
| Pr-001 | P34995 | Prostanoid                 | Prostaglandin E2 subtype EP1            |
| Pr-001 | Q9BGL8 | Prostanoid                 | Prostaglandin E2 subtype EP1            |
| Pr-001 | P70597 | Prostanoid                 | Prostaglandin E2 subtype EP1            |
| Pr-002 | Q95125 | Prostanoid                 | Thromboxane                             |



|        |        |             |                                 |
|--------|--------|-------------|---------------------------------|
| Pr-002 | P21731 | Prostanoid  | Thromboxane                     |
| Pr-002 | P56486 | Prostanoid  | Thromboxane                     |
| Pr-003 | A5D7K8 | Prostanoid  | Prostaglandin E2/D2 subtype EP2 |
| Pr-003 | Q13258 | Prostanoid  | Prostaglandin E2/D2 subtype EP2 |
| Pr-004 | P43114 | Prostanoid  | Prostaglandin E2 subtype EP4    |
| Pr-004 | P32240 | Prostanoid  | Prostaglandin E2 subtype EP4    |
| Pr-004 | Q95KZ0 | Prostanoid  | Prostaglandin E2 subtype EP4    |
| Pr-004 | Q8MJ08 | Prostanoid  | Prostaglandin E2 subtype EP4    |
| Pr-004 | P35408 | Prostanoid  | Prostaglandin E2 subtype EP4    |
| Pr-004 | Q28691 | Prostanoid  | Prostaglandin E2 subtype EP4    |
| Pr-005 | P43115 | Prostanoid  | Prostaglandin E2 subtype EP3    |
| Pr-005 | P50131 | Prostanoid  | Prostaglandin E2 subtype EP3    |
| Pr-005 | P46069 | Prostanoid  | Prostaglandin E2 subtype EP3    |
| Pr-005 | P34979 | Prostanoid  | Prostaglandin E2 subtype EP3    |
| Pr-005 | P34980 | Prostanoid  | Prostaglandin E2 subtype EP3    |
| Pr-005 | P30557 | Prostanoid  | Prostaglandin E2 subtype EP3    |
| Pr-006 | P43088 | Prostanoid  | Prostaglandin F2-alpha          |
| Pr-006 | P37289 | Prostanoid  | Prostaglandin F2-alpha          |
| Pr-006 | P43117 | Prostanoid  | Prostaglandin F2-alpha          |
| Pr-006 | P43118 | Prostanoid  | Prostaglandin F2-alpha          |
| Pr-006 | Q28905 | Prostanoid  | Prostaglandin F2-alpha          |
| Pr-007 | P79393 | Prostanoid  | Prostacyclin                    |
| Pr-007 | P43119 | Prostanoid  | Prostacyclin                    |
| Pr-007 | P43252 | Prostanoid  | Prostacyclin                    |
| Pr-007 | P43253 | Prostanoid  | Prostacyclin                    |
| Pr-008 | Q62928 | Prostanoid  | Prostaglandin E2/D2 subtype EP2 |
| Pr-008 | Q62053 | Prostanoid  | Prostaglandin E2/D2 subtype EP2 |
| Pr-008 | P43116 | Prostanoid  | Prostaglandin E2/D2 subtype EP2 |
| Pr-008 | Q9XT82 | Prostanoid  | Prostaglandin E2/D2 subtype EP2 |
| Pr-009 | O35932 | Prostanoid  | Prostaglandin E2/D2 subtype EP2 |
| Pr-009 | Q9R261 | Prostanoid  | Prostaglandin E2/D2 subtype EP2 |
| Pr-009 | P70263 | Prostanoid  | Prostaglandin E2/D2 subtype EP2 |
| Pr-010 | P34978 | Prostanoid  | Thromboxane                     |
| Pr-010 | P30987 | Prostanoid  | Thromboxane                     |
| Rh-001 | O42431 | (Rhod)opsin | Vertebrate blue/green opsin     |
| Rh-001 | O42330 | (Rhod)opsin | Vertebrate blue/green opsin     |
| Rh-001 | O42327 | (Rhod)opsin | Vertebrate blue/green opsin     |
| Rh-001 | O42307 | (Rhod)opsin | Vertebrate blue/green opsin     |
| Rh-001 | O42301 | (Rhod)opsin | Vertebrate blue/green opsin     |
| Rh-001 | O42328 | (Rhod)opsin | Vertebrate blue/green opsin     |
| Rh-001 | Q90373 | (Rhod)opsin | Vertebrate blue/green opsin     |
| Rh-001 | O42294 | (Rhod)opsin | Vertebrate blue/green opsin     |
| Rh-001 | O42451 | (Rhod)opsin | Vertebrate blue/green opsin     |
| Rh-001 | O42300 | (Rhod)opsin | Vertebrate blue/green opsin     |
| Rh-001 | O42427 | (Rhod)opsin | Vertebrate blue/green opsin     |

|        |        |             |                                        |
|--------|--------|-------------|----------------------------------------|
| Rh-001 | O42452 | (Rhod)opsin | Vertebrate blue/green opsin            |
| Rh-002 | P51472 | (Rhod)opsin | Vertebrate blue/green opsin            |
| Rh-002 | Q9W6A8 | (Rhod)opsin | Vertebrate blue/green opsin            |
| Rh-002 | P32310 | (Rhod)opsin | Vertebrate blue/green opsin            |
| Rh-002 | P28682 | (Rhod)opsin | Vertebrate blue/green opsin            |
| Rh-002 | P87365 | (Rhod)opsin | Vertebrate blue/green opsin            |
| Rh-003 | O96107 | (Rhod)opsin | Rhodopsin Arthropod short wavelength 1 |
| Rh-003 | P91657 | (Rhod)opsin | Rhodopsin Arthropod short wavelength 1 |
| Rh-003 | Q26495 | (Rhod)opsin | Rhodopsin Arthropod short wavelength 1 |
| Rh-003 | P90680 | (Rhod)opsin | Rhodopsin Arthropod short wavelength 1 |
| Rh-004 | P04000 | (Rhod)opsin | Vertebrate red opsin                   |
| Rh-004 | P34989 | (Rhod)opsin | Vertebrate red opsin                   |
| Rh-004 | Q9W6A7 | (Rhod)opsin | Vertebrate red opsin                   |
| Rh-004 | P87367 | (Rhod)opsin | Vertebrate red opsin                   |
| Rh-004 | O35478 | (Rhod)opsin | Vertebrate red opsin                   |
| Rh-004 | Q9BGI7 | (Rhod)opsin | Vertebrate red opsin                   |
| Rh-004 | P22330 | (Rhod)opsin | Vertebrate red opsin                   |
| Rh-004 | P41592 | (Rhod)opsin | Vertebrate red opsin                   |
| Rh-004 | Q95170 | (Rhod)opsin | Vertebrate red opsin                   |
| Rh-004 | Q8AYN0 | (Rhod)opsin | Vertebrate red opsin                   |
| Rh-004 | P22331 | (Rhod)opsin | Vertebrate red opsin                   |
| Rh-004 | O18912 | (Rhod)opsin | Vertebrate red opsin                   |
| Rh-004 | P22329 | (Rhod)opsin | Vertebrate red opsin                   |
| Rh-004 | O18911 | (Rhod)opsin | Vertebrate red opsin                   |
| Rh-004 | O18910 | (Rhod)opsin | Vertebrate red opsin                   |
| Rh-004 | O18913 | (Rhod)opsin | Vertebrate red opsin                   |
| Rh-004 | O12948 | (Rhod)opsin | Vertebrate red opsin                   |
| Rh-004 | P04001 | (Rhod)opsin | Vertebrate red opsin                   |
| Rh-004 | Q9R024 | (Rhod)opsin | Vertebrate red opsin                   |
| Rh-004 | O18914 | (Rhod)opsin | Vertebrate red opsin                   |
| Rh-004 | O35599 | (Rhod)opsin | Vertebrate red opsin                   |
| Rh-004 | O35476 | (Rhod)opsin | Vertebrate red opsin                   |
| Rh-004 | P22332 | (Rhod)opsin | Vertebrate red opsin                   |
| Rh-004 | P32313 | (Rhod)opsin | Vertebrate red opsin                   |
| Rh-004 | P35358 | (Rhod)opsin | Vertebrate red opsin                   |
| Rh-005 | Q4R1I4 | (Rhod)opsin | Cephalochordata melanopsin             |
| Rh-005 | Q2KNE5 | (Rhod)opsin | Vertebrate melanopsin                  |
| Rh-005 | Q9UHM6 | (Rhod)opsin | Vertebrate melanopsin                  |
| Rh-005 | Q5YKK9 | (Rhod)opsin | Vertebrate melanopsin                  |
| Rh-005 | Q8R456 | (Rhod)opsin | Vertebrate melanopsin                  |
| Rh-005 | Q9QXZ9 | (Rhod)opsin | Vertebrate melanopsin                  |
| Rh-005 | Q5XXP2 | (Rhod)opsin | Vertebrate melanopsin                  |
| Rh-006 | P04950 | (Rhod)opsin | Rhodopsin Arthropod short wavelength 1 |
| Rh-006 | O61303 | (Rhod)opsin | Rhodopsin Arthropod short wavelength 1 |
| Rh-006 | P08255 | (Rhod)opsin | Rhodopsin Arthropod short wavelength 1 |

|        |        |             |                                        |
|--------|--------|-------------|----------------------------------------|
| Rh-006 | P29404 | (Rhod)opsin | Rhodopsin Arthropod short wavelength 1 |
| Rh-006 | P17646 | (Rhod)opsin | Rhodopsin Arthropod short wavelength 1 |
| Rh-006 | P28680 | (Rhod)opsin | Rhodopsin Arthropod short wavelength 1 |
| Rh-006 | O02465 | (Rhod)opsin | Rhodopsin Arthropod short wavelength 1 |
| Rh-007 | Q9Z2B3 | (Rhod)opsin | Vertebrate red opsin                   |
| Rh-007 | P47804 | (Rhod)opsin | Vertebrate red opsin                   |
| Rh-007 | P47803 | (Rhod)opsin | Vertebrate red opsin                   |
| Rh-008 | Q7T3Q7 | (Rhod)opsin | Vertebrate ancient (long) opsin        |
| Rh-008 | O13018 | (Rhod)opsin | Vertebrate ancient (long) opsin        |
| Rh-008 | O42490 | (Rhod)opsin | Vertebrate P-opsin                     |
| Rh-009 | P56515 | (Rhod)opsin | Vertebrate blue/green opsin            |
| Rh-009 | O93441 | (Rhod)opsin | Vertebrate blue/green opsin            |
| Rh-009 | Q68J47 | (Rhod)opsin | Vertebrate blue/green opsin            |
| Rh-009 | P28681 | (Rhod)opsin | Vertebrate blue/green opsin            |
| Rh-009 | Q9YGZ4 | (Rhod)opsin | Vertebrate blue/green opsin            |
| Rh-009 | P79809 | (Rhod)opsin | Vertebrate blue/green opsin            |
| Rh-009 | P52202 | (Rhod)opsin | Vertebrate blue/green opsin            |
| Rh-009 | Q9YH01 | (Rhod)opsin | Vertebrate blue/green opsin            |
| Rh-009 | P79902 | (Rhod)opsin | Vertebrate blue/green opsin            |
| Rh-009 | P79911 | (Rhod)opsin | Vertebrate blue/green opsin            |
| Rh-009 | Q9YH02 | (Rhod)opsin | Vertebrate blue/green opsin            |
| Rh-009 | Q9YH05 | (Rhod)opsin | Vertebrate blue/green opsin            |
| Rh-009 | P32309 | (Rhod)opsin | Vertebrate blue/green opsin            |
| Rh-009 | Q9YGZ0 | (Rhod)opsin | Vertebrate blue/green opsin            |
| Rh-009 | P02699 | (Rhod)opsin | Vertebrate blue/green opsin            |
| Rh-009 | P79808 | (Rhod)opsin | Vertebrate blue/green opsin            |
| Rh-009 | P79848 | (Rhod)opsin | Vertebrate blue/green opsin            |
| Rh-009 | Q6W3E1 | (Rhod)opsin | Vertebrate blue/green opsin            |
| Rh-009 | P51488 | (Rhod)opsin | Vertebrate blue/green opsin            |
| Rh-009 | P02700 | (Rhod)opsin | Vertebrate blue/green opsin            |
| Rh-009 | Q9YGZ7 | (Rhod)opsin | Vertebrate blue/green opsin            |
| Rh-009 | O93459 | (Rhod)opsin | Vertebrate blue/green opsin            |
| Rh-009 | P15409 | (Rhod)opsin | Vertebrate blue/green opsin            |
| Rh-009 | P79812 | (Rhod)opsin | Vertebrate blue/green opsin            |
| Rh-009 | O62793 | (Rhod)opsin | Vertebrate blue/green opsin            |
| Rh-009 | P56516 | (Rhod)opsin | Vertebrate blue/green opsin            |
| Rh-009 | P32308 | (Rhod)opsin | Vertebrate blue/green opsin            |
| Rh-009 | P79756 | (Rhod)opsin | Vertebrate blue/green opsin            |
| Rh-009 | Q95KU1 | (Rhod)opsin | Vertebrate blue/green opsin            |
| Rh-009 | Q9YGZ2 | (Rhod)opsin | Vertebrate blue/green opsin            |
| Rh-009 | Q98980 | (Rhod)opsin | Vertebrate blue/green opsin            |
| Rh-009 | O18766 | (Rhod)opsin | Vertebrate blue/green opsin            |
| Rh-009 | P41591 | (Rhod)opsin | Vertebrate blue/green opsin            |
| Rh-009 | P35359 | (Rhod)opsin | Vertebrate blue/green opsin            |
| Rh-009 | Q9YGZ8 | (Rhod)opsin | Vertebrate blue/green opsin            |

|        |        |             |                             |
|--------|--------|-------------|-----------------------------|
| Rh-009 | P22328 | (Rhod)opsin | Vertebrate blue/green opsin |
| Rh-009 | O42268 | (Rhod)opsin | Vertebrate blue/green opsin |
| Rh-009 | P51470 | (Rhod)opsin | Vertebrate blue/green opsin |
| Rh-009 | O62798 | (Rhod)opsin | Vertebrate blue/green opsin |
| Rh-009 | Q8HY69 | (Rhod)opsin | Vertebrate blue/green opsin |
| Rh-009 | Q9YGZ6 | (Rhod)opsin | Vertebrate blue/green opsin |
| Rh-009 | Q9YGZ9 | (Rhod)opsin | Vertebrate blue/green opsin |
| Rh-009 | P87369 | (Rhod)opsin | Vertebrate blue/green opsin |
| Rh-009 | P31355 | (Rhod)opsin | Vertebrate blue/green opsin |
| Rh-009 | O42466 | (Rhod)opsin | Vertebrate blue/green opsin |
| Rh-009 | O62795 | (Rhod)opsin | Vertebrate blue/green opsin |
| Rh-009 | Q9YH03 | (Rhod)opsin | Vertebrate blue/green opsin |
| Rh-009 | O42604 | (Rhod)opsin | Vertebrate blue/green opsin |
| Rh-009 | P35403 | (Rhod)opsin | Vertebrate blue/green opsin |
| Rh-009 | P29403 | (Rhod)opsin | Vertebrate blue/green opsin |
| Rh-009 | Q90214 | (Rhod)opsin | Vertebrate blue/green opsin |
| Rh-009 | O62791 | (Rhod)opsin | Vertebrate blue/green opsin |
| Rh-009 | Q9YH00 | (Rhod)opsin | Vertebrate blue/green opsin |
| Rh-009 | O62796 | (Rhod)opsin | Vertebrate blue/green opsin |
| Rh-009 | Q90215 | (Rhod)opsin | Vertebrate blue/green opsin |
| Rh-009 | P79807 | (Rhod)opsin | Vertebrate blue/green opsin |
| Rh-009 | O62794 | (Rhod)opsin | Vertebrate blue/green opsin |
| Rh-009 | P79901 | (Rhod)opsin | Vertebrate blue/green opsin |
| Rh-009 | P79863 | (Rhod)opsin | Vertebrate blue/green opsin |
| Rh-009 | Q9YGZ5 | (Rhod)opsin | Vertebrate blue/green opsin |
| Rh-009 | Q9DGG4 | (Rhod)opsin | Vertebrate blue/green opsin |
| Rh-009 | Q28886 | (Rhod)opsin | Vertebrate blue/green opsin |
| Rh-009 | P79798 | (Rhod)opsin | Vertebrate blue/green opsin |
| Rh-009 | P08100 | (Rhod)opsin | Vertebrate blue/green opsin |
| Rh-009 | P56514 | (Rhod)opsin | Vertebrate blue/green opsin |
| Rh-009 | P41590 | (Rhod)opsin | Vertebrate blue/green opsin |
| Rh-009 | P79914 | (Rhod)opsin | Vertebrate blue/green opsin |
| Rh-009 | O13227 | (Rhod)opsin | Vertebrate blue/green opsin |
| Rh-009 | Q9YGY9 | (Rhod)opsin | Vertebrate blue/green opsin |
| Rh-009 | Q9YGZ3 | (Rhod)opsin | Vertebrate blue/green opsin |
| Rh-009 | Q9YGZ1 | (Rhod)opsin | Vertebrate blue/green opsin |
| Rh-009 | O62792 | (Rhod)opsin | Vertebrate blue/green opsin |
| Rh-009 | P49912 | (Rhod)opsin | Vertebrate blue/green opsin |
| Rh-009 | P51489 | (Rhod)opsin | Vertebrate blue/green opsin |
| Rh-009 | Q90245 | (Rhod)opsin | Vertebrate blue/green opsin |
| Rh-009 | Q769E8 | (Rhod)opsin | Vertebrate blue/green opsin |
| Rh-009 | Q9YH04 | (Rhod)opsin | Vertebrate blue/green opsin |
| Rh-009 | P79898 | (Rhod)opsin | Vertebrate blue/green opsin |
| Rh-009 | P79903 | (Rhod)opsin | Vertebrate blue/green opsin |
| Rh-010 | Q9W6A5 | (Rhod)opsin | Vertebrate blue/green opsin |

|        |        |             |                                        |
|--------|--------|-------------|----------------------------------------|
| Rh-010 | Q8AYM8 | (Rhod)opsin | Vertebrate blue/green opsin            |
| Rh-010 | Q8AYM7 | (Rhod)opsin | Vertebrate blue/green opsin            |
| Rh-010 | P87366 | (Rhod)opsin | Vertebrate blue/green opsin            |
| Rh-010 | P32312 | (Rhod)opsin | Vertebrate blue/green opsin            |
| Rh-010 | P51474 | (Rhod)opsin | Vertebrate blue/green opsin            |
| Rh-010 | P51471 | (Rhod)opsin | Vertebrate blue/green opsin            |
| Rh-010 | P35357 | (Rhod)opsin | Vertebrate blue/green opsin            |
| Rh-010 | P28683 | (Rhod)opsin | Vertebrate blue/green opsin            |
| Rh-010 | Q9W6A6 | (Rhod)opsin | Vertebrate blue/green opsin            |
| Rh-010 | P32311 | (Rhod)opsin | Vertebrate blue/green opsin            |
| Rh-011 | O57605 | (Rhod)opsin | Vertebrate short wavelength opsin      |
| Rh-011 | P03999 | (Rhod)opsin | Vertebrate short wavelength opsin      |
| Rh-011 | P51490 | (Rhod)opsin | Vertebrate short wavelength opsin      |
| Rh-011 | P60573 | (Rhod)opsin | Vertebrate short wavelength opsin      |
| Rh-011 | P51491 | (Rhod)opsin | Vertebrate short wavelength opsin      |
| Rh-011 | Q63652 | (Rhod)opsin | Vertebrate short wavelength opsin      |
| Rh-011 | P28684 | (Rhod)opsin | Vertebrate short wavelength opsin      |
| Rh-011 | P51473 | (Rhod)opsin | Vertebrate short wavelength opsin      |
| Rh-011 | O13092 | (Rhod)opsin | Vertebrate short wavelength opsin      |
| Rh-011 | P60015 | (Rhod)opsin | Vertebrate short wavelength opsin      |
| Rh-012 | O16019 | (Rhod)opsin | Rhodopsin Arthropod short wavelength 2 |
| Rh-012 | O18486 | (Rhod)opsin | Rhodopsin Arthropod short wavelength 2 |
| Rh-012 | O16018 | (Rhod)opsin | Rhodopsin Arthropod short wavelength 2 |
| Rh-012 | O16017 | (Rhod)opsin | Rhodopsin Arthropod short wavelength 2 |
| Rh-012 | P35356 | (Rhod)opsin | Rhodopsin Arthropod short wavelength 2 |
| Rh-012 | O18312 | (Rhod)opsin | Rhodopsin Arthropod short wavelength 2 |
| Rh-012 | O18315 | (Rhod)opsin | Rhodopsin Arthropod short wavelength 2 |
| Rh-012 | O18481 | (Rhod)opsin | Rhodopsin Arthropod short wavelength 2 |
| Rh-012 | O18485 | (Rhod)opsin | Rhodopsin Arthropod short wavelength 2 |
| Rh-012 | O16020 | (Rhod)opsin | Rhodopsin Arthropod short wavelength 2 |
| Rh-013 | Q17053 | (Rhod)opsin | Rhodopsin Arthropod short wavelength 2 |
| Rh-013 | Q95YI3 | (Rhod)opsin | Rhodopsin Arthropod short wavelength 2 |
| Rh-013 | P35362 | (Rhod)opsin | Rhodopsin Arthropod short wavelength 2 |
| Rh-013 | O01668 | (Rhod)opsin | Rhodopsin Arthropod short wavelength 2 |
| Rh-013 | Q17296 | (Rhod)opsin | Rhodopsin Arthropod short wavelength 2 |
| Rh-013 | O02464 | (Rhod)opsin | Rhodopsin Arthropod short wavelength 2 |
| Rh-013 | Q94741 | (Rhod)opsin | Rhodopsin Arthropod short wavelength 2 |
| Rh-014 | O15973 | (Rhod)opsin | Rhodopsin 6 1                          |
| Rh-014 | O16005 | (Rhod)opsin | Vertebrate opsin                       |
| Rh-014 | Q17094 | (Rhod)opsin | Vertebrate opsin                       |
| Rh-014 | P31356 | (Rhod)opsin | Vertebrate opsin                       |
| Rh-014 | P24603 | (Rhod)opsin | Vertebrate opsin                       |
| Rh-014 | P09241 | (Rhod)opsin | Vertebrate opsin                       |
| Rh-015 | Q90309 | (Rhod)opsin | Vertebrate short wavelength opsin      |
| Rh-015 | P87368 | (Rhod)opsin | Vertebrate short wavelength opsin      |

|         |        |                     |                                        |
|---------|--------|---------------------|----------------------------------------|
| Rh-015  | Q9W6A9 | (Rhod)opsin         | Vertebrate short wavelength opsin      |
| Rh-016  | O42266 | (Rhod)opsin         | Vertebrate Parapinopsin                |
| Rh-016  | P51476 | (Rhod)opsin         | Vertebrate Pinopsin                    |
| Rh-016  | P51475 | (Rhod)opsin         | Vertebrate Pinopsin                    |
| Rh-017  | O14718 | (Rhod)opsin         | Vertebrate Peropsin                    |
| Rh-017  | O35214 | (Rhod)opsin         | Vertebrate Peropsin                    |
| Rh-018  | Q804X9 | (Rhod)opsin         | Vertebrate melanopsin                  |
| Rh-018  | Q804Q2 | (Rhod)opsin         | Vertebrate melanopsin                  |
| Rh-019  | Q4U4D2 | (Rhod)opsin         | Vertebrate melanopsin                  |
| Rh-019  | O57422 | (Rhod)opsin         | Vertebrate melanopsin                  |
| Rh-020  | P28678 | (Rhod)opsin         | Rhodopsin Arthropod short wavelength 2 |
| Rh-020  | P06002 | (Rhod)opsin         | Rhodopsin Arthropod short wavelength 2 |
| Rh-020  | P22269 | (Rhod)opsin         | Rhodopsin Arthropod short wavelength 2 |
| Rh-021  | P35361 | (Rhod)opsin         | Rhodopsin Arthropod short wavelength 2 |
| Rh-021  | P35360 | (Rhod)opsin         | Rhodopsin Arthropod short wavelength 2 |
| Rh-022  | P28679 | (Rhod)opsin         | Rhodopsin Arthropod short wavelength 2 |
| Rh-022  | P08099 | (Rhod)opsin         | Rhodopsin Arthropod short wavelength 2 |
| Rh-023  | Q6U736 | (Rhod)opsin         | Vertebrate opsin 5                     |
| Rh-023  | Q6VZZ7 | (Rhod)opsin         | Vertebrate opsin 5                     |
| Rh-024  | Q9H1Y3 | (Rhod)opsin         | Vertebrate opsin type 3                |
| Rh-024  | Q9WUK7 | (Rhod)opsin         | Vertebrate opsin type 3                |
| Rh-025  | Q1JPS6 | (Rhod)opsin         | Vertebrate melanopsin                  |
| Rh-025  | Q6XL69 | (Rhod)opsin         | Vertebrate melanopsin                  |
| Rh-026  | Q25157 | (Rhod)opsin         | Rhodopsin 5 3                          |
| Rh-026  | Q25158 | (Rhod)opsin         | Rhodopsin 5 3                          |
| T2R-001 | P59539 | Taste receptors T2R | Taste receptors T2R                    |
| T2R-001 | P59540 | Taste receptors T2R | Taste receptors T2R                    |
| T2R-001 | Q646G0 | Taste receptors T2R | Taste receptors T2R                    |
| T2R-001 | Q646F9 | Taste receptors T2R | Taste receptors T2R                    |
| T2R-001 | Q646E1 | Taste receptors T2R | Taste receptors T2R                    |
| T2R-001 | Q645Z7 | Taste receptors T2R | Taste receptors T2R                    |
| T2R-001 | Q645T4 | Taste receptors T2R | Taste receptors T2R                    |
| T2R-001 | Q5Y4Z8 | Taste receptors T2R | Taste receptors T2R                    |
| T2R-001 | Q5Y4Y8 | Taste receptors T2R | Taste receptors T2R                    |
| T2R-002 | Q7RTR8 | Taste receptors T2R | Taste receptors T2R                    |
| T2R-002 | Q646G3 | Taste receptors T2R | Taste receptors T2R                    |
| T2R-002 | Q646B8 | Taste receptors T2R | Taste receptors T2R                    |
| T2R-002 | Q645U9 | Taste receptors T2R | Taste receptors T2R                    |
| T2R-002 | Q5Y4Z2 | Taste receptors T2R | Taste receptors T2R                    |
| T2R-002 | Q645Z3 | Taste receptors T2R | Taste receptors T2R                    |
| T2R-003 | Q7M707 | Taste receptors T2R | Taste receptors T2R                    |
| T2R-003 | Q7M715 | Taste receptors T2R | Taste receptors T2R                    |
| T2R-003 | Q675B9 | Taste receptors T2R | Taste receptors T2R                    |
| T2R-003 | Q675B8 | Taste receptors T2R | Taste receptors T2R                    |
| T2R-004 | Q9NYW5 | Taste receptors T2R | Taste receptors T2R                    |

|         |        |                     |                     |
|---------|--------|---------------------|---------------------|
| T2R-004 | Q646F1 | Taste receptors T2R | Taste receptors T2R |
| T2R-004 | Q645Y8 | Taste receptors T2R | Taste receptors T2R |
| T2R-004 | Q646D3 | Taste receptors T2R | Taste receptors T2R |
| T2R-005 | Q7TQB0 | Taste receptors T2R | Taste receptors T2R |
| T2R-005 | Q67ES7 | Taste receptors T2R | Taste receptors T2R |
| T2R-005 | Q5Y4Z0 | Taste receptors T2R | Taste receptors T2R |
| T2R-006 | P59538 | Taste receptors T2R | Taste receptors T2R |
| T2R-006 | Q646B9 | Taste receptors T2R | Taste receptors T2R |
| T2R-006 | Q645V3 | Taste receptors T2R | Taste receptors T2R |
| T2R-007 | Q9NYW0 | Taste receptors T2R | Taste receptors T2R |
| T2R-007 | Q646F5 | Taste receptors T2R | Taste receptors T2R |
| T2R-007 | Q646B5 | Taste receptors T2R | Taste receptors T2R |
| T2R-007 | Q646D7 | Taste receptors T2R | Taste receptors T2R |
| T2R-007 | Q645V0 | Taste receptors T2R | Taste receptors T2R |
| T2R-008 | Q9NYV7 | Taste receptors T2R | Taste receptors T2R |
| T2R-008 | Q646B3 | Taste receptors T2R | Taste receptors T2R |
| T2R-008 | Q646E7 | Taste receptors T2R | Taste receptors T2R |
| T2R-008 | Q646D1 | Taste receptors T2R | Taste receptors T2R |
| T2R-009 | Q9NYV9 | Taste receptors T2R | Taste receptors T2R |
| T2R-009 | Q646B6 | Taste receptors T2R | Taste receptors T2R |
| T2R-009 | Q646D8 | Taste receptors T2R | Taste receptors T2R |
| T2R-009 | Q645V1 | Taste receptors T2R | Taste receptors T2R |
| T2R-010 | Q9NYW7 | Taste receptors T2R | Taste receptors T2R |
| T2R-010 | Q8MJU6 | Taste receptors T2R | Taste receptors T2R |
| T2R-010 | Q646G9 | Taste receptors T2R | Taste receptors T2R |
| T2R-010 | Q646H0 | Taste receptors T2R | Taste receptors T2R |
| T2R-011 | P59542 | Taste receptors T2R | Taste receptors T2R |
| T2R-011 | Q645Z9 | Taste receptors T2R | Taste receptors T2R |
| T2R-011 | Q5Y4Z5 | Taste receptors T2R | Taste receptors T2R |
| T2R-011 | Q5Y4Y9 | Taste receptors T2R | Taste receptors T2R |
| T2R-012 | Q646A5 | Taste receptors T2R | Taste receptors T2R |
| T2R-012 | Q645U7 | Taste receptors T2R | Taste receptors T2R |
| T2R-012 | Q646D0 | Taste receptors T2R | Taste receptors T2R |
| T2R-013 | Q9NYV8 | Taste receptors T2R | Taste receptors T2R |
| T2R-013 | Q646D9 | Taste receptors T2R | Taste receptors T2R |
| T2R-013 | Q645V2 | Taste receptors T2R | Taste receptors T2R |
| T2R-014 | Q9NYW2 | Taste receptors T2R | Taste receptors T2R |
| T2R-014 | Q646A3 | Taste receptors T2R | Taste receptors T2R |
| T2R-014 | Q645U8 | Taste receptors T2R | Taste receptors T2R |
| T2R-015 | Q7M713 | Taste receptors T2R | Taste receptors T2R |
| T2R-015 | Q67ER8 | Taste receptors T2R | Taste receptors T2R |
| T2R-016 | Q7TQA8 | Taste receptors T2R | Taste receptors T2R |
| T2R-016 | Q675B7 | Taste receptors T2R | Taste receptors T2R |
| T2R-017 | Q7M710 | Taste receptors T2R | Taste receptors T2R |
| T2R-017 | Q67ET4 | Taste receptors T2R | Taste receptors T2R |

|         |        |                     |                     |
|---------|--------|---------------------|---------------------|
| T2R-018 | Q9JKA3 | Taste receptors T2R | Taste receptors T2R |
| T2R-018 | Q67ET5 | Taste receptors T2R | Taste receptors T2R |
| T2R-019 | Q7TQA4 | Taste receptors T2R | Taste receptors T2R |
| T2R-019 | Q67ES0 | Taste receptors T2R | Taste receptors T2R |
| T2R-020 | Q7M711 | Taste receptors T2R | Taste receptors T2R |
| T2R-020 | Q67ES1 | Taste receptors T2R | Taste receptors T2R |
| T2R-021 | Q7M709 | Taste receptors T2R | Taste receptors T2R |
| T2R-021 | Q67ES6 | Taste receptors T2R | Taste receptors T2R |
| T2R-022 | Q7M724 | Taste receptors T2R | Taste receptors T2R |
| T2R-022 | Q67ET1 | Taste receptors T2R | Taste receptors T2R |
| T2R-023 | Q7M721 | Taste receptors T2R | Taste receptors T2R |
| T2R-023 | Q67ET3 | Taste receptors T2R | Taste receptors T2R |
| T2R-024 | Q7M717 | Taste receptors T2R | Taste receptors T2R |
| T2R-024 | Q675C0 | Taste receptors T2R | Taste receptors T2R |
| T2R-025 | Q9JKT7 | Taste receptors T2R | Taste receptors T2R |
| T2R-025 | Q7M720 | Taste receptors T2R | Taste receptors T2R |
| T2R-026 | Q9JKT8 | Taste receptors T2R | Taste receptors T2R |
| T2R-026 | Q7M722 | Taste receptors T2R | Taste receptors T2R |
| T2R-027 | Q9JKT4 | Taste receptors T2R | Taste receptors T2R |
| T2R-027 | Q9JKT5 | Taste receptors T2R | Taste receptors T2R |
| T2R-028 | Q9JKF0 | Taste receptors T2R | Taste receptors T2R |
| T2R-028 | P59528 | Taste receptors T2R | Taste receptors T2R |
| T2R-029 | Q7TQA5 | Taste receptors T2R | Taste receptors T2R |
| T2R-029 | Q67ER9 | Taste receptors T2R | Taste receptors T2R |
| T2R-030 | Q7M718 | Taste receptors T2R | Taste receptors T2R |
| T2R-030 | Q67ES5 | Taste receptors T2R | Taste receptors T2R |
| T2R-031 | Q7M712 | Taste receptors T2R | Taste receptors T2R |
| T2R-031 | Q9JKE8 | Taste receptors T2R | Taste receptors T2R |
| T2R-032 | Q9JKT3 | Taste receptors T2R | Taste receptors T2R |
| T2R-032 | Q67ET0 | Taste receptors T2R | Taste receptors T2R |
| T2R-033 | Q7TQB9 | Taste receptors T2R | Taste receptors T2R |
| T2R-033 | Q67ES3 | Taste receptors T2R | Taste receptors T2R |
| T2R-034 | Q7TQA7 | Taste receptors T2R | Taste receptors T2R |
| T2R-034 | Q67ET7 | Taste receptors T2R | Taste receptors T2R |
| T2R-035 | Q7M725 | Taste receptors T2R | Taste receptors T2R |
| T2R-035 | Q9JKT9 | Taste receptors T2R | Taste receptors T2R |
| T2R-036 | Q7M723 | Taste receptors T2R | Taste receptors T2R |
| T2R-036 | Q67ES9 | Taste receptors T2R | Taste receptors T2R |
| T2R-037 | Q9NYW1 | Taste receptors T2R | Taste receptors T2R |
| T2R-037 | Q645T0 | Taste receptors T2R | Taste receptors T2R |
| T2R-038 | Q646F4 | Taste receptors T2R | Taste receptors T2R |
| T2R-038 | Q645T2 | Taste receptors T2R | Taste receptors T2R |
| T2R-039 | Q7TQB8 | Taste receptors T2R | Taste receptors T2R |
| T2R-039 | Q67ET2 | Taste receptors T2R | Taste receptors T2R |
| T2R-040 | Q9JKE7 | Taste receptors T2R | Taste receptors T2R |



|         |        |                     |                     |
|---------|--------|---------------------|---------------------|
| T2R-040 | P59532 | Taste receptors T2R | Taste receptors T2R |
| T2R-041 | Q9JKT2 | Taste receptors T2R | Taste receptors T2R |
| T2R-041 | Q9JKU1 | Taste receptors T2R | Taste receptors T2R |
| T2R-042 | P59533 | Taste receptors T2R | Taste receptors T2R |
| T2R-042 | Q697L6 | Taste receptors T2R | Taste receptors T2R |
| T2R-042 | Q697L5 | Taste receptors T2R | Taste receptors T2R |
| T2R-042 | Q697L4 | Taste receptors T2R | Taste receptors T2R |
| T2R-042 | Q697L2 | Taste receptors T2R | Taste receptors T2R |
| T2R-042 | Q646E9 | Taste receptors T2R | Taste receptors T2R |
| T2R-042 | Q697L3 | Taste receptors T2R | Taste receptors T2R |
| T2R-043 | Q9NYW3 | Taste receptors T2R | Taste receptors T2R |
| T2R-043 | Q646F6 | Taste receptors T2R | Taste receptors T2R |
| T2R-043 | Q646A2 | Taste receptors T2R | Taste receptors T2R |
| T2R-043 | Q645V8 | Taste receptors T2R | Taste receptors T2R |
| T2R-043 | Q645T7 | Taste receptors T2R | Taste receptors T2R |
| T2R-043 | Q646D6 | Taste receptors T2R | Taste receptors T2R |
| T2R-044 | Q9NYW4 | Taste receptors T2R | Taste receptors T2R |
| T2R-044 | Q646D5 | Taste receptors T2R | Taste receptors T2R |
| T2R-044 | Q646E6 | Taste receptors T2R | Taste receptors T2R |
| T2R-044 | Q645Z1 | Taste receptors T2R | Taste receptors T2R |
| T2R-044 | Q645U0 | Taste receptors T2R | Taste receptors T2R |
| T2R-045 | P59544 | Taste receptors T2R | Taste receptors T2R |
| T2R-045 | Q646C3 | Taste receptors T2R | Taste receptors T2R |
| T2R-045 | Q646E4 | Taste receptors T2R | Taste receptors T2R |
| T2R-045 | Q646A1 | Taste receptors T2R | Taste receptors T2R |
| T2R-045 | Q645V7 | Taste receptors T2R | Taste receptors T2R |
| T2R-046 | P59535 | Taste receptors T2R | Taste receptors T2R |
| T2R-046 | Q646B1 | Taste receptors T2R | Taste receptors T2R |
| T2R-046 | Q645Y9 | Taste receptors T2R | Taste receptors T2R |
| T2R-046 | Q645U5 | Taste receptors T2R | Taste receptors T2R |
| T2R-046 | Q646D4 | Taste receptors T2R | Taste receptors T2R |
| T2R-047 | Q646E2 | Taste receptors T2R | Taste receptors T2R |
| T2R-047 | Q646C1 | Taste receptors T2R | Taste receptors T2R |
| T2R-047 | Q645V4 | Taste receptors T2R | Taste receptors T2R |
| T2R-047 | P59541 | Taste receptors T2R | Taste receptors T2R |
| T2R-048 | P59534 | Taste receptors T2R | Taste receptors T2R |
| T2R-048 | Q646A9 | Taste receptors T2R | Taste receptors T2R |
| T2R-048 | Q646C8 | Taste receptors T2R | Taste receptors T2R |
| T2R-048 | Q645S5 | Taste receptors T2R | Taste receptors T2R |
| T2R-049 | Q9NYW6 | Taste receptors T2R | Taste receptors T2R |
| T2R-049 | Q645Y5 | Taste receptors T2R | Taste receptors T2R |
| T2R-049 | Q646A7 | Taste receptors T2R | Taste receptors T2R |
| T2R-049 | Q646D2 | Taste receptors T2R | Taste receptors T2R |
| T2R-050 | P59536 | Taste receptors T2R | Taste receptors T2R |
| T2R-050 | Q646B2 | Taste receptors T2R | Taste receptors T2R |

|         |        |                                                |                                  |
|---------|--------|------------------------------------------------|----------------------------------|
| T2R-050 | Q646C7 | Taste receptors T2R                            | Taste receptors T2R              |
| T2R-051 | P59543 | Taste receptors T2R                            | Taste receptors T2R              |
| T2R-051 | Q646E3 | Taste receptors T2R                            | Taste receptors T2R              |
| T2R-051 | Q646A0 | Taste receptors T2R                            | Taste receptors T2R              |
| T2R-052 | P59537 | Taste receptors T2R                            | Taste receptors T2R              |
| T2R-052 | Q646B4 | Taste receptors T2R                            | Taste receptors T2R              |
| T2R-052 | Q5Y500 | Taste receptors T2R                            | Taste receptors T2R              |
| T2R-053 | Q646F8 | Taste receptors T2R                            | Taste receptors T2R              |
| T2R-053 | Q645T3 | Taste receptors T2R                            | Taste receptors T2R              |
| T2R-054 | Q645T6 | Taste receptors T2R                            | Taste receptors T2R              |
| T2R-054 | Q646G2 | Taste receptors T2R                            | Taste receptors T2R              |
| T2R-055 | Q7TQA9 | Taste receptors T2R                            | Taste receptors T2R              |
| T2R-055 | Q67ES2 | Taste receptors T2R                            | Taste receptors T2R              |
| T2R-056 | Q7TQA6 | Taste receptors T2R                            | Taste receptors T2R              |
| T2R-056 | Q4VHE7 | Taste receptors T2R                            | Taste receptors T2R              |
| T2R-057 | P59530 | Taste receptors T2R                            | Taste receptors T2R              |
| T2R-057 | Q9JKE9 | Taste receptors T2R                            | Taste receptors T2R              |
| Th-001  | O08725 | Thyrotropin-releasing hormone and Secretagogue | Growth hormone secretagogue      |
| Th-001  | Q99P50 | Thyrotropin-releasing hormone and Secretagogue | Growth hormone secretagogue      |
| Th-001  | A5A4L1 | Thyrotropin-releasing hormone and Secretagogue | Growth hormone secretagogue      |
| Th-001  | A5A4K9 | Thyrotropin-releasing hormone and Secretagogue | Growth hormone secretagogue      |
| Th-001  | Q92847 | Thyrotropin-releasing hormone and Secretagogue | Growth hormone secretagogue      |
| Th-001  | Q95254 | Thyrotropin-releasing hormone and Secretagogue | Growth hormone secretagogue      |
| Th-001  | O43193 | Thyrotropin-releasing hormone and Secretagogue | Growth hormone secretagogue like |
| Th-002  | P21761 | Thyrotropin-releasing hormone and Secretagogue | Thyrotropin-releasing hormone    |
| Th-002  | Q01717 | Thyrotropin-releasing hormone and Secretagogue | Thyrotropin-releasing hormone    |
| Th-002  | O46639 | Thyrotropin-releasing hormone and Secretagogue | Thyrotropin-releasing hormone    |
| Th-002  | P34981 | Thyrotropin-releasing hormone and Secretagogue | Thyrotropin-releasing hormone    |
| Th-002  | O93603 | Thyrotropin-releasing hormone and Secretagogue | Thyrotropin-releasing hormone    |
| Th-002  | Q28596 | Thyrotropin-releasing hormone and Secretagogue | Thyrotropin-releasing hormone    |
| Vi-001  | P69332 | Viral                                          | US28                             |
| Vi-001  | P69333 | Viral                                          | US28                             |
| outlier | O15974 | (Rhod)opsin                                    | G0 coupled Rhodopsin Mollusc     |
| outlier | P22147 | Amine                                          | Alpha Adrenoceptors type 1d      |
| outlier | O77408 | Amine                                          | Alpha Adrenoceptors type 2a      |
| outlier | O01670 | Amine                                          | Alpha Adrenoceptors type 2c      |
| outlier | P41596 | Amine                                          | Dopamine Insect type 1           |
| outlier | Q24563 | Amine                                          | Dopamine Insect type 2           |

|         |        |                                             |                                                    |
|---------|--------|---------------------------------------------|----------------------------------------------------|
| outlier | Q8IS44 | Amine                                       | Dopamine Vertebrate type 2                         |
| outlier | Q09388 | Amine                                       | Musc. acetylcholine Non Vertebrate                 |
| outlier | Q18007 | Amine                                       | Musc. acetylcholine Non Vertebrate                 |
| outlier | P16395 | Amine                                       | Musc. acetylcholine Non Vertebrate 2               |
| outlier | Q19084 | Amine                                       | Serotonin type 1a                                  |
| outlier | P20905 | Amine                                       | Serotonin type 1a                                  |
| outlier | Q18775 | Amine                                       | Serotonin type 1a                                  |
| outlier | Q8CGM1 | Brain-specific angiogenesis inhibitor (BAI) | Brain-specific angiogenesis inhibitor (BAI) type 2 |
| outlier | Q5R7Y0 | Brain-specific angiogenesis inhibitor (BAI) | Brain-specific angiogenesis inhibitor (BAI) type 2 |
| outlier | O60241 | Brain-specific angiogenesis inhibitor (BAI) | Brain-specific angiogenesis inhibitor (BAI) type 2 |
| outlier | Q80ZF8 | Brain-specific angiogenesis inhibitor (BAI) | Brain-specific angiogenesis inhibitor (BAI) type 3 |
| outlier | O60242 | Brain-specific angiogenesis inhibitor (BAI) | Brain-specific angiogenesis inhibitor (BAI) type 3 |
| outlier | Q9R0M0 | Cadherin EGF LAG                            | Cadherin EGF LAG (CELSR)                           |
| outlier | Q9NYQ6 | Cadherin EGF LAG                            | Cadherin EGF LAG (CELSR)                           |
| outlier | Q9QYP2 | Cadherin EGF LAG                            | Cadherin EGF LAG (CELSR)                           |
| outlier | Q91ZI0 | Cadherin EGF LAG                            | Cadherin EGF LAG (CELSR)                           |
| outlier | O88278 | Cadherin EGF LAG                            | Cadherin EGF LAG (CELSR)                           |
| outlier | Q9NYQ7 | Cadherin EGF LAG                            | Cadherin EGF LAG (CELSR)                           |
| outlier | Q9V5N8 | Cadherin EGF LAG                            | Cadherin EGF LAG (CELSR)                           |
| outlier | Q9HCU4 | Cadherin EGF LAG                            | Cadherin EGF LAG (CELSR)                           |
| outlier | O35161 | Cadherin EGF LAG                            | Cadherin EGF LAG (CELSR)                           |
| outlier | Q9IB86 | Calcitonin                                  | Calcitonin                                         |
| outlier | Q68EK2 | Calcitonin                                  | Calcitonin                                         |
| outlier | Q8AXU4 | Calcitonin                                  | Calcitonin                                         |
| outlier | Q7ZXS8 | Calcitonin                                  | Calcitonin                                         |
| outlier | Q9R1W5 | Calcitonin                                  | Calcitonin                                         |
| outlier | Q8WN93 | Calcitonin                                  | Calcitonin                                         |
| outlier | Q63118 | Calcitonin                                  | Calcitonin                                         |
| outlier | Q16602 | Calcitonin                                  | Calcitonin                                         |
| outlier | A6QP74 | Calcitonin                                  | Calcitonin                                         |
| outlier | Q0P4Y4 | Calcitonin                                  | Calcitonin                                         |
| outlier | P25117 | Calcitonin                                  | Calcitonin                                         |
| outlier | Q60755 | Calcitonin                                  | Calcitonin                                         |
| outlier | P30988 | Calcitonin                                  | Calcitonin                                         |
| outlier | O08893 | Calcitonin                                  | Calcitonin                                         |
| outlier | P79222 | Calcitonin                                  | Calcitonin                                         |
| outlier | P32214 | Calcitonin                                  | Calcitonin                                         |
| outlier | Q09460 | Calcitonin                                  | Calcitonin                                         |
| outlier | Q9QY96 | Calcium sensing                             | Calcium sensing 1                                  |
| outlier | P35384 | Calcium sensing                             | Calcium sensing 1                                  |
| outlier | P41180 | Calcium sensing                             | Calcium sensing 1                                  |
| outlier | P48442 | Calcium sensing                             | Calcium sensing 1                                  |

|         |        |                                |                                           |
|---------|--------|--------------------------------|-------------------------------------------|
| outlier | O70410 | Calcium sensing                | Calcium sensing 2                         |
| outlier | P13773 | cAMP receptors                 | cAMP receptors                            |
| outlier | P35352 | cAMP receptors                 | cAMP receptors                            |
| outlier | P34907 | cAMP receptors                 | cAMP receptors                            |
| outlier | Q9TX43 | cAMP receptors                 | cAMP receptors                            |
| outlier | Q8ITC7 | CAPA                           | CAPA                                      |
| outlier | P48960 | CD97                           | CD97                                      |
| outlier | Q9Z0M6 | CD97                           | CD97                                      |
| outlier | Q8SQA4 | CD97                           | CD97                                      |
| outlier | Q9J529 | Class A Orphan/other           | EBV-induced                               |
| outlier | Q96CH1 | Class A Orphan/other           | GPR139                                    |
| outlier | Q9DDD1 | Class A Orphan/other           | GPR139                                    |
| outlier | Q8TDV2 | Class A Orphan/other           | GPR139                                    |
| outlier | Q8N684 | Class A Orphan/other           | GPR88                                     |
| outlier | Q7Z2Q7 | Class A Orphan/other           | LGR like (hormone receptors) type 7 and 8 |
| outlier | P35410 | Class A Orphan/other           | Mas proto-oncogene and Mas-related (MRGs) |
| outlier | Q9Y2T6 | Class A Orphan/other           | Other 519                                 |
| outlier | Q99PG6 | Class C Other                  | Other 15                                  |
| outlier | Q9Z0R8 | Class C Other                  | Other 15                                  |
| outlier | Q09630 | Class C Other                  | Other 16                                  |
| outlier | Q7RTX1 | Class C Other                  | Other 25                                  |
| outlier | Q9PW88 | Class C Other                  | Other 5                                   |
| outlier | Q8K4Z6 | Class C Other                  | Other 6                                   |
| outlier | Q70VB1 | Class C Other                  | Other 6                                   |
| outlier | P91685 | Class C Other                  | Other 8                                   |
| outlier | P34998 | Corticotropin releasing factor | Corticotropin releasing factor            |
| outlier | O42602 | Corticotropin releasing factor | Corticotropin releasing factor            |
| outlier | Q60748 | Corticotropin releasing factor | Corticotropin releasing factor            |
| outlier | Q13324 | Corticotropin releasing factor | Corticotropin releasing factor            |
| outlier | P47866 | Corticotropin releasing factor | Corticotropin releasing factor            |
| outlier | O42603 | Corticotropin releasing factor | Corticotropin releasing factor            |
| outlier | Q16983 | Diuretic hormone               | Diuretic hormone                          |
| outlier | P35464 | Diuretic hormone               | Diuretic hormone                          |
| outlier | Q9UHX3 | ERM1                           | ERM1                                      |
| outlier | Q2Q426 | ERM1                           | ERM1                                      |
| outlier | Q2Q421 | ERM1                           | ERM1                                      |
| outlier | Q9BY15 | ERM1                           | ERM1                                      |
| outlier | Q86SQ3 | ERM1                           | ERM1                                      |
| outlier | Q91ZE5 | ERM1                           | ERM1                                      |
| outlier | Q61549 | ERM1                           | ERM1                                      |
| outlier | Q5Y4N8 | ERM1                           | ERM1                                      |
| outlier | Q14246 | ERM1                           | ERM1                                      |
| outlier | Q9WV18 | GABA-B                         | GABA-B subtype 1                          |
| outlier | Q9UBS5 | GABA-B                         | GABA-B subtype 1                          |
| outlier | Q9Z0U4 | GABA-B                         | GABA-B subtype 1                          |

|         |        |                            |                            |
|---------|--------|----------------------------|----------------------------|
| outlier | O75899 | GABA-B                     | GABA-B subtype 2           |
| outlier | O88871 | GABA-B                     | GABA-B subtype 2           |
| outlier | Q80T41 | GABA-B                     | GABA-B subtype 2           |
| outlier | Q0P543 | Gastric inhibitory peptide | Gastric inhibitory peptide |
| outlier | P48546 | Gastric inhibitory peptide | Gastric inhibitory peptide |
| outlier | P43218 | Gastric inhibitory peptide | Gastric inhibitory peptide |
| outlier | P43219 | Gastric inhibitory peptide | Gastric inhibitory peptide |
| outlier | O35659 | Glucagon                   | Glucagon                   |
| outlier | P32301 | Glucagon                   | Glucagon                   |
| outlier | P43220 | Glucagon                   | Glucagon                   |
| outlier | Q5IXF8 | Glucagon                   | Glucagon                   |
| outlier | O95838 | Glucagon                   | Glucagon                   |
| outlier | Q9Z0W0 | Glucagon                   | Glucagon                   |
| outlier | Q61606 | Glucagon                   | Glucagon                   |
| outlier | P47871 | Glucagon                   | Glucagon                   |
| outlier | P30082 | Glucagon                   | Glucagon                   |
| outlier | Q8VEC3 | GPR110                     | GPR110                     |
| outlier | Q5T601 | GPR110                     | GPR110                     |
| outlier | Q8IZF5 | GPR113                     | GPR113                     |
| outlier | Q58Y75 | GPR113                     | GPR113                     |
| outlier | Q3V3Z3 | GPR114                     | GPR114                     |
| outlier | Q8IZF4 | GPR114                     | GPR114                     |
| outlier | Q7Z7M1 | GPR114                     | GPR114                     |
| outlier | Q86SQ6 | GPR123                     | GPR123                     |
| outlier | Q8IWK6 | GPR124                     | GPR124                     |
| outlier | Q7TT36 | GPR124                     | GPR124                     |
| outlier | Q96PE1 | GPR124                     | GPR124                     |
| outlier | Q91ZV8 | GPR124                     | GPR124                     |
| outlier | Q6F3F9 | GPR126                     | GPR126                     |
| outlier | Q86SQ4 | GPR126                     | GPR126                     |
| outlier | C6KFA3 | GPR126                     | GPR126                     |
| outlier | B7ZCC9 | GPR126                     | GPR126                     |
| outlier | Q8BM96 | GPR128                     | GPR128                     |
| outlier | Q96K78 | GPR128                     | GPR128                     |
| outlier | Q80T32 | GPR133                     | GPR133                     |
| outlier | A6QLU6 | GPR133                     | GPR133                     |
| outlier | Q8K209 | GPR56                      | GPR56                      |
| outlier | Q9Y653 | GPR56                      | GPR56                      |
| outlier | Q8K3V3 | GPR56                      | GPR56                      |
| outlier | Q50DM8 | GPR56                      | GPR56                      |
| outlier | Q50DM7 | GPR56                      | GPR56                      |
| outlier | Q50DM6 | GPR56                      | GPR56                      |
| outlier | Q50DM5 | GPR56                      | GPR56                      |
| outlier | Q8CJ12 | GPR64                      | GPR64                      |
| outlier | Q8CJ11 | GPR64                      | GPR64                      |

|         |        |                                  |                                  |
|---------|--------|----------------------------------|----------------------------------|
| outlier | Q8IZP9 | GPR64                            | GPR64                            |
| outlier | Q8IZF6 | GPR64                            | GPR64                            |
| outlier | Q86Y34 | GPR97                            | GPR97                            |
| outlier | Q8R0T6 | GPR97                            | GPR97                            |
| outlier | P32082 | Growth hormone-releasing hormone | Growth hormone-releasing hormone |
| outlier | Q02643 | Growth hormone-releasing hormone | Growth hormone-releasing hormone |
| outlier | P34999 | Growth hormone-releasing hormone | Growth hormone-releasing hormone |
| outlier | Q02644 | Growth hormone-releasing hormone | Growth hormone-releasing hormone |
| outlier | Q80TR1 | Latrophilin                      | Latrophilin                      |
| outlier | O88917 | Latrophilin                      | Latrophilin                      |
| outlier | O94910 | Latrophilin                      | Latrophilin                      |
| outlier | O97831 | Latrophilin                      | Latrophilin                      |
| outlier | O97817 | Latrophilin                      | Latrophilin                      |
| outlier | O88923 | Latrophilin                      | Latrophilin                      |
| outlier | O95490 | Latrophilin                      | Latrophilin                      |
| outlier | B3MFV7 | Latrophilin                      | Latrophilin                      |
| outlier | B3N8M1 | Latrophilin                      | Latrophilin                      |
| outlier | B4J780 | Latrophilin                      | Latrophilin                      |
| outlier | B4KMZ1 | Latrophilin                      | Latrophilin                      |
| outlier | B4GD14 | Latrophilin                      | Latrophilin                      |
| outlier | B4LNA8 | Latrophilin                      | Latrophilin                      |
| outlier | B4P3A0 | Latrophilin                      | Latrophilin                      |
| outlier | Q292N4 | Latrophilin                      | Latrophilin                      |
| outlier | A1Z7G7 | Latrophilin                      | Latrophilin                      |
| outlier | B4HS00 | Latrophilin                      | Latrophilin                      |
| outlier | Q9ESC1 | Latrophilin                      | Latrophilin                      |
| outlier | Q923X1 | Latrophilin                      | Latrophilin                      |
| outlier | Q9HBW9 | Latrophilin                      | Latrophilin                      |
| outlier | P97772 | Metabotropic glutamate           | Metabotropic glutamate type 1 3  |
| outlier | P23385 | Metabotropic glutamate           | Metabotropic glutamate type 1 3  |
| outlier | Q13255 | Metabotropic glutamate           | Metabotropic glutamate type 1 3  |
| outlier | Q14BI2 | Metabotropic glutamate           | Metabotropic glutamate type 2 3  |
| outlier | P31421 | Metabotropic glutamate           | Metabotropic glutamate type 2 3  |
| outlier | Q14416 | Metabotropic glutamate           | Metabotropic glutamate type 2 3  |
| outlier | Q9QYS2 | Metabotropic glutamate           | Metabotropic glutamate type 3 1  |
| outlier | P31422 | Metabotropic glutamate           | Metabotropic glutamate type 3 1  |
| outlier | Q14832 | Metabotropic glutamate           | Metabotropic glutamate type 3 1  |
| outlier | Q5RAL3 | Metabotropic glutamate           | Metabotropic glutamate type 3 1  |
| outlier | Q1ZZH1 | Metabotropic glutamate           | Metabotropic glutamate type 3 1  |
| outlier | P41594 | Metabotropic glutamate           | Metabotropic glutamate type 5 2  |
| outlier | P31424 | Metabotropic glutamate           | Metabotropic glutamate type 5 2  |
| outlier | Q3UVX5 | Metabotropic glutamate           | Metabotropic glutamate type 5 2  |

|         |        |                                |                                            |
|---------|--------|--------------------------------|--------------------------------------------|
| outlier | P35349 | Metabotropic glutamate         | Metabotropic glutamate type 6              |
| outlier | O15303 | Metabotropic glutamate         | Metabotropic glutamate type 6              |
| outlier | Q86314 | Metabotropic glutamate         | Metabotropic glutamate type 6              |
| outlier | Q5NCH9 | Metabotropic glutamate         | Metabotropic glutamate type 6              |
| outlier | Q14833 | Metabotropic glutamate         | Metabotropic glutamate type 8              |
| outlier | Q14831 | Metabotropic glutamate         | Metabotropic glutamate type 8              |
| outlier | P31423 | Metabotropic glutamate         | Metabotropic glutamate type 8              |
| outlier | P35400 | Metabotropic glutamate         | Metabotropic glutamate type 8              |
| outlier | O00222 | Metabotropic glutamate         | Metabotropic glutamate type 8              |
| outlier | P70579 | Metabotropic glutamate         | Metabotropic glutamate type 8              |
| outlier | P47743 | Metabotropic glutamate         | Metabotropic glutamate type 8              |
| outlier | Q68ED2 | Metabotropic glutamate         | Metabotropic glutamate type 8              |
| outlier | Q5RDQ8 | Metabotropic glutamate         | Metabotropic glutamate type 8              |
| outlier | Q1ZZH0 | Metabotropic glutamate         | Metabotropic glutamate type 8              |
| outlier | Q68EF4 | Metabotropic glutamate         | Metabotropic glutamate type 8              |
| outlier | O97148 | Methuselah-like proteins (MTH) | Methuselah-like proteins (MTH) type 1      |
| outlier | P83118 | Methuselah-like proteins (MTH) | Methuselah-like proteins (MTH) type 1      |
| outlier | Q9VRN2 | Methuselah-like proteins (MTH) | Methuselah-like proteins (MTH) type 1      |
| outlier | Q9GT50 | Methuselah-like proteins (MTH) | Methuselah-like proteins (MTH) type 1      |
| outlier | P83120 | Methuselah-like proteins (MTH) | Methuselah-like proteins (MTH) type 1      |
| outlier | Q9VS77 | Methuselah-like proteins (MTH) | Methuselah-like proteins (MTH) type 1      |
| outlier | Q9VSE7 | Methuselah-like proteins (MTH) | Methuselah-like proteins (MTH) type 1      |
| outlier | P83119 | Methuselah-like proteins (MTH) | Methuselah-like proteins (MTH) type 1      |
| outlier | Q95NT6 | Methuselah-like proteins (MTH) | Methuselah-like proteins (MTH) type 2      |
| outlier | Q95NQ0 | Methuselah-like proteins (MTH) | Methuselah-like proteins (MTH) type 2      |
| outlier | Q9W0R5 | Methuselah-like proteins (MTH) | Methuselah-like proteins (MTH) type 2      |
| outlier | Q9V818 | Methuselah-like proteins (MTH) | Methuselah-like proteins (MTH) type 3      |
| outlier | Q9W0R6 | Methuselah-like proteins (MTH) | Methuselah-like proteins (MTH) type 3      |
| outlier | Q9V817 | Methuselah-like proteins (MTH) | Methuselah-like proteins (MTH) type 4      |
| outlier | Q9NQ55 | Nucleotide-like                | P2RY11                                     |
| outlier | Q96G91 | Nucleotide-like                | P2RY11                                     |
| outlier | Q8TDS5 | Nucleotide-like                | P2RY5                                      |
| outlier | Q99ME2 | Nucleotide-like                | Purinoceptor P2RY12-14 GPR87 (UDP-Glucose) |
| outlier | Q5U9X3 | Odorant                        | Odorant 4                                  |
| outlier | Q5T6X5 | Odorant                        | Odorant 5                                  |
| outlier | Q8NGE0 | Olfactory                      | Olfactory 184                              |
| outlier | Q8N148 | Olfactory                      | Olfactory 216                              |
| outlier | Q9H342 | Olfactory                      | Olfactory 243                              |
| outlier | Q8NGR6 | Olfactory                      | Olfactory 257                              |
| outlier | A6NFC9 | Olfactory                      | Olfactory 73                               |
| outlier | Q8NH09 | Olfactory                      | Olfactory 85                               |
| outlier | Q8NH95 | Olfactory                      | Olfactory 95                               |
| outlier | Q8NGJ8 | Olfactory                      | Olfactory II fam 10 / MOR263-269           |
| outlier | Q6IF63 | Olfactory                      | Olfactory II fam 12 / MOR250               |
| outlier | Q9GZK7 | Olfactory                      | Olfactory II fam 3 / MOR255                |

|         |        |                     |                                         |
|---------|--------|---------------------|-----------------------------------------|
| outlier | Q8NG92 | Olfactory           | Olfactory II fam 3 / MOR255             |
| outlier | A6NND4 | Olfactory           | Olfactory II fam 3 / MOR255             |
| outlier | Q8NH08 | Olfactory           | Olfactory II fam 3 / MOR255             |
| outlier | P70205 | PACAP               | PACAP                                   |
| outlier | P41586 | PACAP               | PACAP                                   |
| outlier | Q29627 | PACAP               | PACAP                                   |
| outlier | P32215 | PACAP               | PACAP                                   |
| outlier | P41593 | Parathyroid hormone | Parathyroid hormone                     |
| outlier | Q03431 | Parathyroid hormone | Parathyroid hormone                     |
| outlier | Q9TU31 | Parathyroid hormone | Parathyroid hormone                     |
| outlier | P25107 | Parathyroid hormone | Parathyroid hormone                     |
| outlier | P50133 | Parathyroid hormone | Parathyroid hormone                     |
| outlier | P25961 | Parathyroid hormone | Parathyroid hormone                     |
| outlier | Q5RAQ1 | Parathyroid hormone | Parathyroid hormone                     |
| outlier | Q1LZF7 | Parathyroid hormone | Parathyroid hormone                     |
| outlier | P49190 | Parathyroid hormone | Parathyroid hormone                     |
| outlier | Q91V95 | Parathyroid hormone | Parathyroid hormone                     |
| outlier | Q9W4Y2 | PDF                 | PDF                                     |
| outlier | Q8WPA2 | Peptide             | Allostatin                              |
| outlier | Q75W84 | Peptide             | Annetocin                               |
| outlier | Q6SW98 | Peptide             | C-C Chemokine type 11                   |
| outlier | Q66673 | Peptide             | C-C Chemokine type 3                    |
| outlier | P52380 | Peptide             | C-C Chemokine type 3                    |
| outlier | Q86917 | Peptide             | C-C Chemokine type 8                    |
| outlier | Q9J5H4 | Peptide             | Fmet-leu-phe                            |
| outlier | Q9J5I0 | Peptide             | Fmet-leu-phe                            |
| outlier | Q11082 | Peptide             | Galanin type 1                          |
| outlier | Q03613 | Peptide             | GPR74 like                              |
| outlier | Q09638 | Peptide             | GPR74 like                              |
| outlier | P34311 | Peptide             | GPR74 like                              |
| outlier | Q9NDM2 | Peptide             | Melanin-concentrating hormone receptors |
| outlier | Q9VZW5 | Peptide             | Neuropeptide Y / peptide YY             |
| outlier | Q9VNM1 | Peptide             | Neuropeptide Y type 1                   |
| outlier | Q09502 | Peptide             | Prolactin-releasing peptide (GPR10)     |
| outlier | O42179 | Peptide             | Somatostatin type 5                     |
| outlier | Q03566 | Peptide             | Substance P (NK1)                       |
| outlier | P25931 | Peptide             | Tachykinin like 2                       |
| outlier | Q5W9T5 | Peptide             | Vasotocin                               |
| outlier | Q7YW31 | Peptide             | Vasotocin                               |
| outlier | Q868T3 | Peptide             | Vasotocin                               |
| outlier | Q2V2K5 | Peptide             | Vasotocin                               |
| outlier | Q5WA50 | Peptide             | Vasotocin                               |
| outlier | P47872 | Secretin            | Secretin                                |
| outlier | O46502 | Secretin            | Secretin                                |
| outlier | P23811 | Secretin            | Secretin                                |



|         |        |                                   |                                   |
|---------|--------|-----------------------------------|-----------------------------------|
| outlier | Q5FWI2 | Secretin                          | Secretin                          |
| outlier | Q717C2 | Taste                             | Taste 1                           |
| outlier | Q717C1 | Taste                             | Taste 1                           |
| outlier | Q7RTX0 | Taste                             | Taste 1                           |
| outlier | Q925I4 | Taste                             | Taste 2                           |
| outlier | Q9Z0R7 | Taste                             | Taste 2                           |
| outlier | Q8TE23 | Taste                             | Taste 2                           |
| outlier | Q49HI0 | Taste                             | Taste 2                           |
| outlier | A3QNZ8 | Taste                             | Taste 2                           |
| outlier | A3QNZ9 | Taste                             | Taste 2                           |
| outlier | A3QP00 | Taste                             | Taste 2                           |
| outlier | A3QP01 | Taste                             | Taste 2                           |
| outlier | A3QP07 | Taste                             | Taste 2                           |
| outlier | A3QP08 | Taste                             | Taste 2                           |
| outlier | Q925D8 | Taste                             | Taste 21                          |
| outlier | Q923K1 | Taste                             | Taste 21                          |
| outlier | Q49KI5 | Taste                             | Taste 22                          |
| outlier | Q49HH9 | Taste                             | Taste 23                          |
| outlier | O62772 | To be sorted                      | To be sorted                      |
| outlier | Q90812 | To be sorted                      | To be sorted                      |
| outlier | P35347 | To be sorted                      | To be sorted                      |
| outlier | P35353 | To be sorted                      | To be sorted                      |
| outlier | Q76LL8 | To be sorted                      | To be sorted                      |
| outlier | O97827 | To be sorted                      | To be sorted                      |
| outlier | Q9Z173 | To be sorted                      | To be sorted                      |
| outlier | Q9HAR2 | To be sorted                      | To be sorted                      |
| outlier | Q80TS3 | To be sorted                      | To be sorted                      |
| outlier | O14514 | To be sorted                      | To be sorted                      |
| outlier | Q3UHD1 | To be sorted                      | To be sorted                      |
| outlier | Q8IZF7 | To be sorted                      | To be sorted                      |
| outlier | Q8IZF3 | To be sorted                      | To be sorted                      |
| outlier | Q9D2L6 | To be sorted                      | To be sorted                      |
| outlier | Q6QNK2 | To be sorted                      | To be sorted                      |
| outlier | Q9WVT0 | To be sorted                      | To be sorted                      |
| outlier | Q8IZF2 | To be sorted                      | To be sorted                      |
| outlier | Q6JAN0 | To be sorted                      | To be sorted                      |
| outlier | Q8VHN7 | To be sorted                      | To be sorted                      |
| outlier | Q91085 | Vasoactive intestinal polypeptide | Vasoactive intestinal polypeptide |
| outlier | Q90308 | Vasoactive intestinal polypeptide | Vasoactive intestinal polypeptide |
| outlier | P97751 | Vasoactive intestinal polypeptide | Vasoactive intestinal polypeptide |
| outlier | P32241 | Vasoactive intestinal polypeptide | Vasoactive intestinal polypeptide |
| outlier | P30083 | Vasoactive intestinal polypeptide | Vasoactive intestinal polypeptide |
| outlier | Q28992 | Vasoactive intestinal polypeptide | Vasoactive intestinal polypeptide |
| outlier | P41588 | Vasoactive intestinal polypeptide | Vasoactive intestinal polypeptide |
| outlier | P41587 | Vasoactive intestinal polypeptide | Vasoactive intestinal polypeptide |

|         |        |                                   |                                   |
|---------|--------|-----------------------------------|-----------------------------------|
| outlier | P35000 | Vasoactive intestinal polypeptide | Vasoactive intestinal polypeptide |
| outlier | P09703 | Viral                             | US27                              |
| outlier | Q6TAC4 | Vomeronasal                       | Vomeronasal 9                     |
| outlier | Q5J3F6 | Vomeronasal receptors other       | Vomeronasal receptors other       |
| outlier | Q7Z5H4 | Vomeronasal receptors other       | Vomeronasal receptors other       |
| outlier | Q7YRP1 | Vomeronasal receptors other       | Vomeronasal receptors other       |
| outlier | Q9EQ48 | Vomeronasal receptors V1RA        | Vomeronasal receptors V1RA        |
| outlier | Q9EP79 | Vomeronasal receptors V1RA        | Vomeronasal receptors V1RA        |
| outlier | Q5J3G9 | Vomeronasal receptors V1RA        | Vomeronasal receptors V1RA        |
| outlier | Q5J3E5 | Vomeronasal receptors V1RA        | Vomeronasal receptors V1RA        |
| outlier | Q5J3M4 | Vomeronasal receptors V1RA        | Vomeronasal receptors V1RA        |
| outlier | Q5J3L6 | Vomeronasal receptors V1RA        | Vomeronasal receptors V1RA        |
| outlier | Q9EPB8 | Vomeronasal receptors V1RA        | Vomeronasal receptors V1RA        |
| outlier | Q9EQ51 | Vomeronasal receptors V1RA        | Vomeronasal receptors V1RA        |
| outlier | Q9EQ52 | Vomeronasal receptors V1RA        | Vomeronasal receptors V1RA        |
| outlier | Q5J3K9 | Vomeronasal receptors V1RA        | Vomeronasal receptors V1RA        |
| outlier | Q5J3K5 | Vomeronasal receptors V1RA        | Vomeronasal receptors V1RA        |
| outlier | Q62850 | Vomeronasal receptors V1RA        | Vomeronasal receptors V1RA        |
| outlier | Q8VIC7 | Vomeronasal receptors V1RA        | Vomeronasal receptors V1RA        |
| outlier | Q8R2E6 | Vomeronasal receptors V1RA        | Vomeronasal receptors V1RA        |
| outlier | Q8VIC6 | Vomeronasal receptors V1RA        | Vomeronasal receptors V1RA        |
| outlier | Q8VIC9 | Vomeronasal receptors V1RA        | Vomeronasal receptors V1RA        |
| outlier | Q8VBS7 | Vomeronasal receptors V1RA        | Vomeronasal receptors V1RA        |
| outlier | Q9WUF1 | Vomeronasal receptors V1RB        | Vomeronasal receptors V1RB        |
| outlier | Q9EQ45 | Vomeronasal receptors V1RB        | Vomeronasal receptors V1RB        |
| outlier | Q9EP51 | Vomeronasal receptors V1RB        | Vomeronasal receptors V1RB        |
| outlier | Q9EQ47 | Vomeronasal receptors V1RB        | Vomeronasal receptors V1RB        |
| outlier | Q9EP93 | Vomeronasal receptors V1RB        | Vomeronasal receptors V1RB        |
| outlier | Q9EQ46 | Vomeronasal receptors V1RB        | Vomeronasal receptors V1RB        |
| outlier | Q9EQ44 | Vomeronasal receptors V1RB        | Vomeronasal receptors V1RB        |
| outlier | Q5J3M9 | Vomeronasal receptors V1RB        | Vomeronasal receptors V1RB        |
| outlier | Q5J3L7 | Vomeronasal receptors V1RB        | Vomeronasal receptors V1RB        |
| outlier | Q5J3N1 | Vomeronasal receptors V1RB        | Vomeronasal receptors V1RB        |
| outlier | Q5J3M3 | Vomeronasal receptors V1RB        | Vomeronasal receptors V1RB        |
| outlier | Q5J3L4 | Vomeronasal receptors V1RB        | Vomeronasal receptors V1RB        |
| outlier | Q7Z5H5 | Vomeronasal receptors V1RF        | Vomeronasal receptors V1RF        |
| outlier | Q7YRP2 | Vomeronasal receptors V1RF        | Vomeronasal receptors V1RF        |
| outlier | Q8NFZ6 | Vomeronasal receptors V1RL        | Vomeronasal receptors V1RL        |
| outlier | Q9GZP7 | Vomeronasal receptors V1RL        | Vomeronasal receptors V1RL        |
| outlier | Q8WN92 | Vomeronasal receptors V1RL        | Vomeronasal receptors V1RL        |
| outlier | Q7YRP3 | Vomeronasal receptors V1RL        | Vomeronasal receptors V1RL        |
| outlier | Q9BXE9 | Vomeronasal receptors V1RL        | Vomeronasal receptors V1RL        |

Table S2. GPCR detection of 54 membrane protein sequences in the test dataset. The three sequences in red are falsely predicted to be non-GPCRs, due to incomplete information in the target dataset.

| Uniprot ID    | Entry name         | Minimum distance to the target dataset | GPCR annotation |
|---------------|--------------------|----------------------------------------|-----------------|
| Q8ITC9        | PK1R_DROME         | 1.00E-53                               | GPCR            |
| Q6IF36        | O8G2P_HUMAN        | 8.00E-148                              | GPCR            |
| P0DN80        | OR5H8_HUMAN        | 1.00E-149                              | GPCR            |
| P0DN82        | O12D1_HUMAN        | 2.00E-152                              | GPCR            |
| P0DMU2        | OR83P_HUMAN        | 0                                      | GPCR            |
| P0DN81        | O13C7_HUMAN        | 1.00E-154                              | GPCR            |
| P0DMS8        | AA3R_HUMAN         | 0                                      | GPCR            |
| <b>O45767</b> | <b>SRX43_CAEEL</b> | <b>0.002</b>                           | <b>GPCR</b>     |
| G5ECD9        | AEX2_CAEEL         | 4.00E-08                               | GPCR            |
| P0DN77        | OPSG2_HUMAN        | 0                                      | GPCR            |
| P0DN78        | OPSG3_HUMAN        | 0                                      | GPCR            |
| G4WMX4        | RYAR_TRICA         | 1.00E-94                               | GPCR            |
| E9QJ73        | CXR32_DANRE        | 9.00E-61                               | GPCR            |
| O02300        | NTR1_CAEEL         | 4.00E-35                               | GPCR            |
| O62169        | NTR2_CAEEL         | 2.00E-31                               | GPCR            |
| Q9U320        | DAF38_CAEEL        | 2.00E-23                               | GPCR            |
| Q8SWR3        | SPR_DROME          | 6.00E-20                               | GPCR            |
| Q23497        | NPR9_CAEEL         | 7.00E-59                               | GPCR            |
| Q18321        | DAF37_CAEEL        | 3.00E-35                               | GPCR            |
| Q4V622        | CCH2R_DROME        | 4.00E-57                               | GPCR            |
| A1ZAX0        | CCH1R_DROME        | 5.00E-55                               | GPCR            |
| <b>G5ECQ2</b> | <b>FRIZ2_CAEEL</b> | <b>0.022</b>                           | <b>GPCR</b>     |
| Q8C4G9        | AGRA1_MOUSE        | 0                                      | GPCR            |
| <b>Q8K4C8</b> | <b>FZD9_RAT</b>    | <b>0.015</b>                           | <b>GPCR</b>     |
| D4A3T6        | AGRF2_RAT          | 0                                      | GPCR            |
| E9Q4J9        | AGRF2_MOUSE        | 0                                      | GPCR            |
| Q7JQF1        | OAMB_DROME         | 3.00E-65                               | GPCR            |
| Q8BGT1        | FLRT3_MOUSE        | 5.00E-21                               | GPCR            |
| Q9VML9        | TRISR_DROME        | 6.00E-27                               | GPCR            |
| Q7SY09        | AGRL4_DANRE        | 0                                      | GPCR            |
| Q8IN35        | SIFAR_DROME        | 2.00E-54                               | GPCR            |
| S4X0Q8        | AGRA3_DANRE        | 0                                      | GPCR            |
| G5E8Q8        | AGRF5_MOUSE        | 0                                      | GPCR            |
| E7FBY6        | AGRA2_DANRE        | 0                                      | GPCR            |
| Q6ZIV7        | HIR1_ORYSJ         | 12                                     | Non-GPCR        |
| P0DOE6        | MATRX_HRSS2        | 8.2                                    | Non-GPCR        |
| P0DOE7        | MATRX_HRSVA        | 8.2                                    | Non-GPCR        |
| Q5QNI2        | NCL1_ORYSJ         | 1                                      | Non-GPCR        |

|        |             |       |          |
|--------|-------------|-------|----------|
| Q8L636 | NCL_ARATH   | 0.48  | Non-GPCR |
| Q8LD98 | NHL6_ARATH  | 0.025 | Non-GPCR |
| Q6K3R5 | NCL2_ORYSJ  | 1.8   | Non-GPCR |
| G3V7W1 | PDCD6_RAT   | 2     | Non-GPCR |
| A3PDP9 | PHND2_PROM0 | 3.6   | Non-GPCR |
| Q9AYU1 | QR1_TRIVS   | 1.4   | Non-GPCR |
| F1PCT7 | RPN2_CANLF  | 0.83  | Non-GPCR |
| E2RQ08 | RPN1_CANLF  | 0.22  | Non-GPCR |
| F4I3V6 | SHW1_ARATH  | 0.91  | Non-GPCR |
| Q9V3J4 | SEC13_DROME | 0.054 | Non-GPCR |
| Q9FJ04 | SPH26_ARATH | 1.9   | Non-GPCR |
| F1PJP5 | STT3A_CANLF | 1.6   | Non-GPCR |
| B3H7A6 | SPH19_ARATH | 10    | Non-GPCR |
| F2Q9V4 | SPH6_ARATH  | 1.6   | Non-GPCR |
| Q9FI83 | SPH28_ARATH | 1.2   | Non-GPCR |
| Q8GUJ1 | UXT2_ARATH  | 0.75  | Non-GPCR |
